# Supplementary material for: Enantiopure synthesis of dihydrobenzo[1,4]-oxazine-3-carboxylic acids and a route to benzoxazinyl oxazolidinones
Source: Royal Society of Chemistry journal article supplement (doi:10.1039/c4ob02475c), 2015-01-01

## **Electronic Supplementary Information**

### **Enantio-pure synthesis of dihydrobenzo[1,4]-oxazine-3-carboxylic acids and approach to benzoxazinyl oxazolidinones**

**Rajesh Malhotra,<sup>a</sup> Tushar K. Dey,<sup>a,b</sup> Sourav Basu<sup>\*b</sup> and Saumen Hajra<sup>\*c,d</sup>**

<sup>a</sup> *Guru Jambheshwar University of Science and Technology, Hisar, Haryana 125001, India.*

<sup>b</sup> *TCG Life Sciences Ltd, Saltlake, Kolkata 700091, India, and Department of Chemistry,*

<sup>c</sup> *Centre of Biomedical Research, SGPGIMS Campus, Lucknow 226014, India.*

<sup>d</sup> *Department of Chemistry, Indian Institute of Technology Kharagpur, Kharagpur 721302, India;*

*sourav@chembiotek.com; saumen.hajra@cbmr.res.in and shajra@chem.iitkgp.ernet.in*

#### **Contents**

#### **NMR Spectra, LC-MS and HPLC Chromatogram**

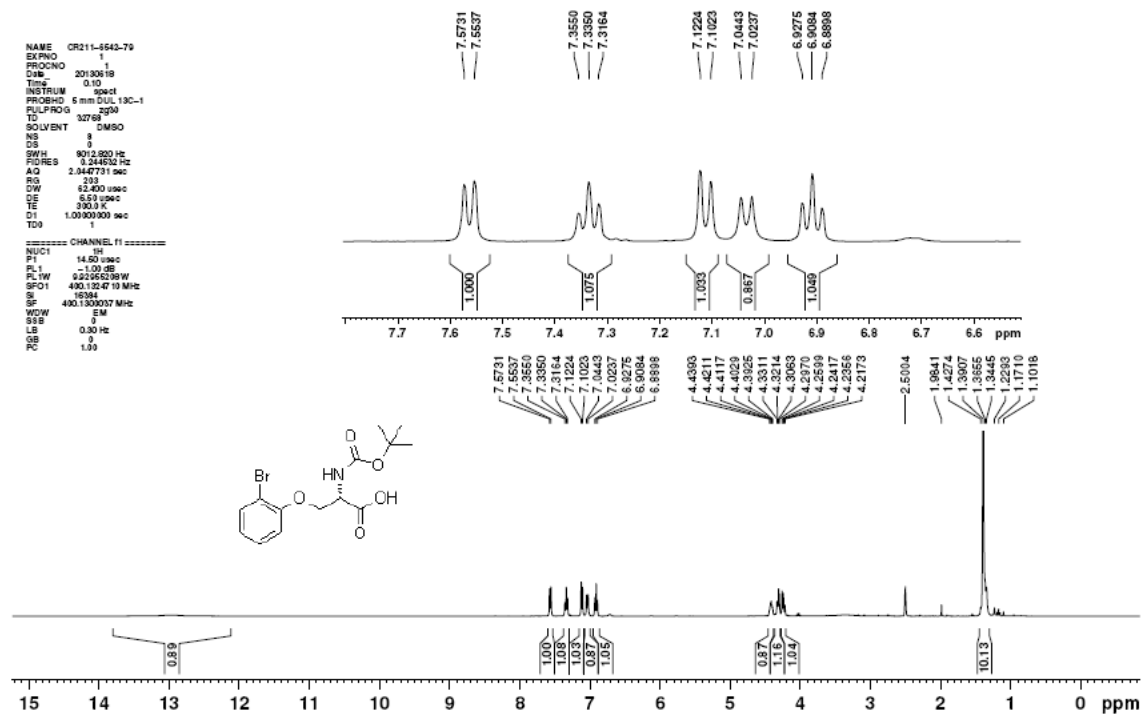

<sup>1</sup>H NMR spectrum (400MHz, DMSO-d<sub>6</sub>) of compound 3a

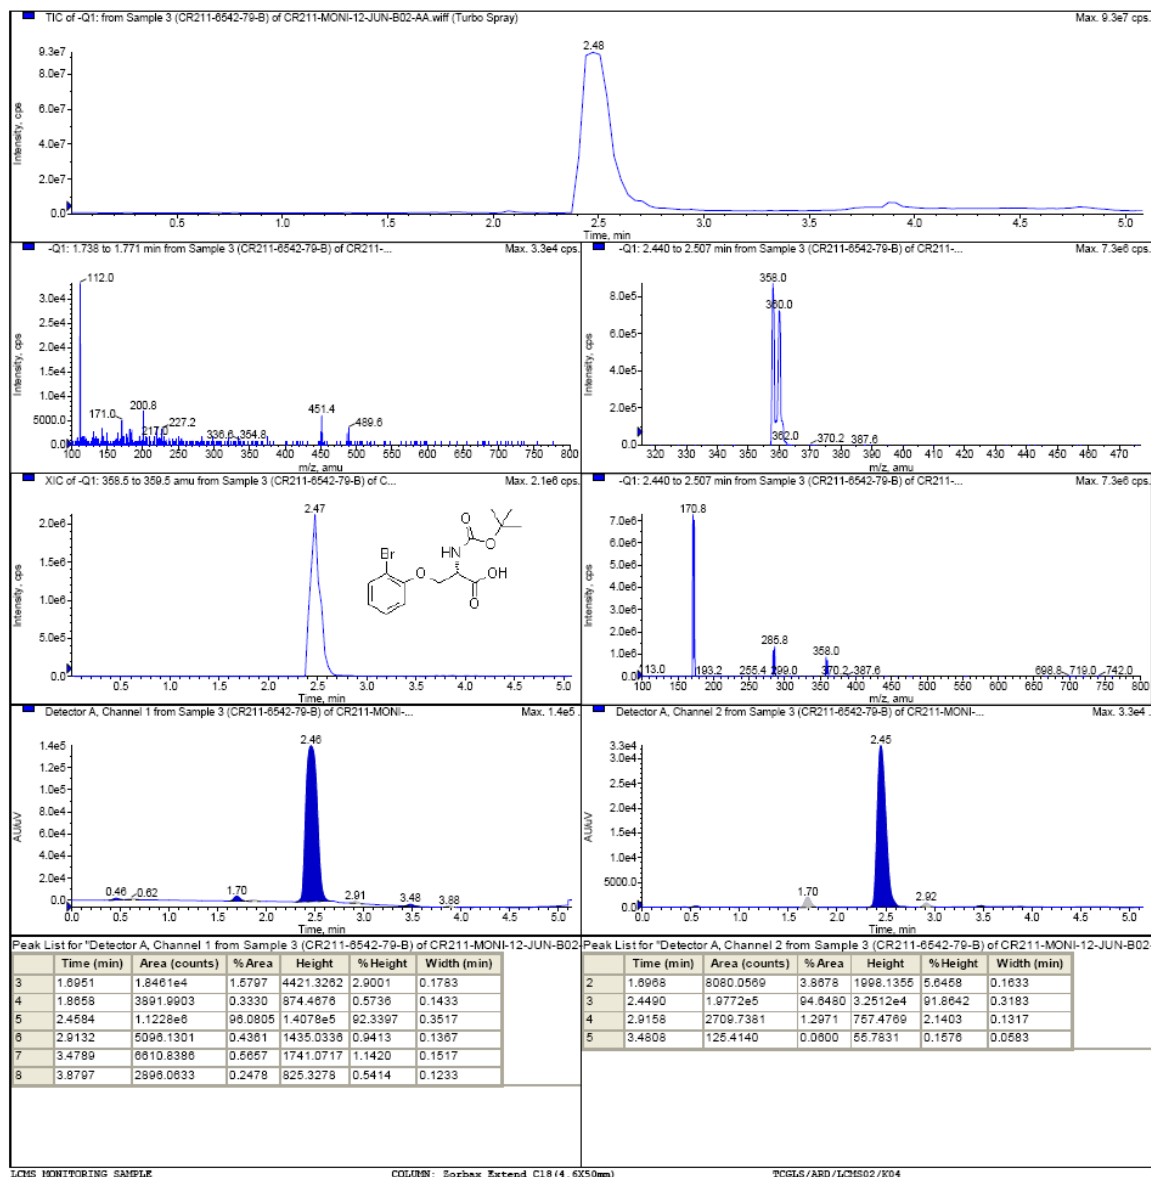

Channel 1 at wavelength 220 nm,  
Channel 2 at wavelength 260 nm

NE40Ac:ACN

Analysed by

## LCMS spectrum of compound 3a

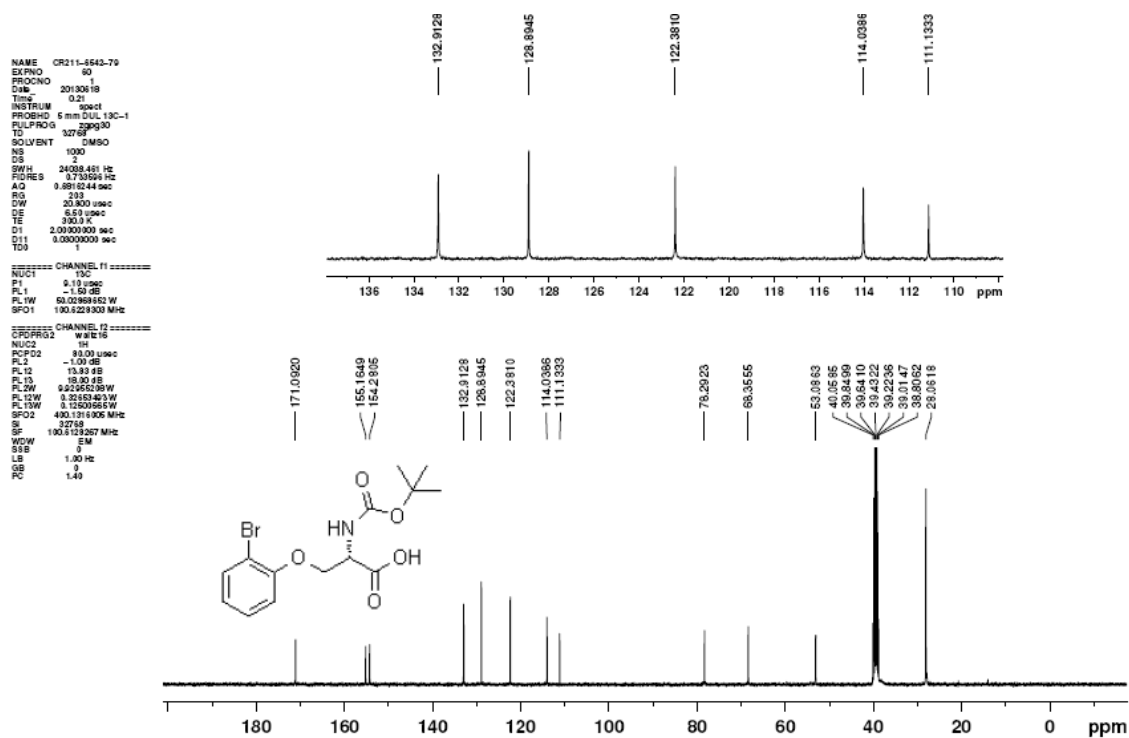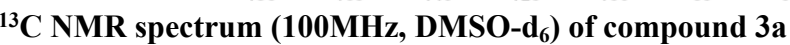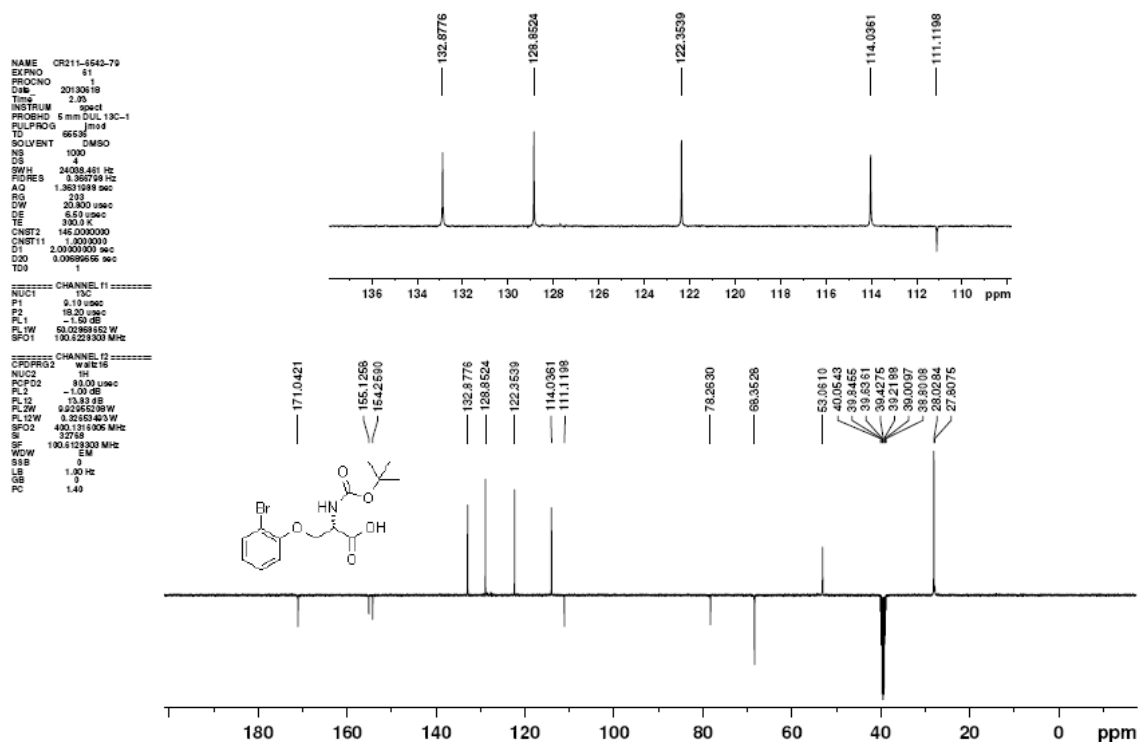

**APT NMR spectrum (100MHz, DMSO-d<sub>6</sub>) of compound 3a**

Acq Operator : KONDABABU  
 Injection Date : 1/8/2015 2:44:23 PM  
 Acq. Method : C:\Chem32\1\DATA\JAN-2015\080115 2015-01-08 09-48-05->  
 Analysis Method : C:\CHEM32\1\METHODS\A1.M  
 Last Changed : Wed, 7. Jan. 2015, 06:20:38 pm

Location : Vial 3/  
 Inj. No. : 1  
 Inj. Vol. : 5 µl

Sample ID:CR211-8259-67 (D1+L1)

Column Name:Chiralpak IA(250x4.6mm)5µ  
 ARD/K/7804  
 Mobile phase:Hexane/EtOH/TFA:90/10/0.1  
 Flow Rate:1.0 ml/min  
 Solubility:MeOH

Ref :KD/08.01.15/370

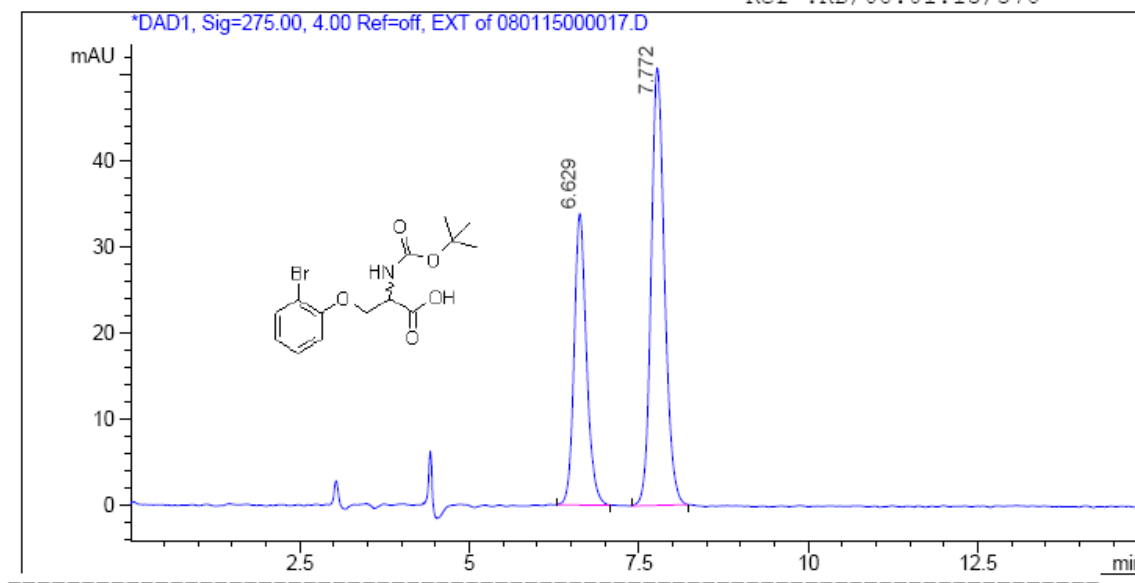

Signal 1: DAD1, Sig=275.00, 4.00 Ref=off, EXT

| Peak # | RT [min] | Area   | Area % |
|--------|----------|--------|--------|
| 1      | 6.63     | 429.50 | 38.00  |
| 2      | 7.77     | 700.67 | 62.00  |

**Chiral HPLC of a mixture of D- and L-isomer of compound 3a prepared by external mixing (not racemic mixture)**

Acq Operator : KONDABABU  
 Injection Date : 1/8/2015 3:16:47 PM  
 Acq. Method : C:\Chem32\1\DATA\JAN-2015\080115 2015-01-08 09-48-05->  
 Analysis Method : C:\CHEM32\1\METHODS\A1.M  
 Last Changed : Wed, 7. Jan. 2015, 06:20:38 pm

Location : Vial 39  
 Inj. No. : 1  
 Inj. Vol. : 5 µl

Sample ID:CR211-8259-67L1

Column Name:Chiralpak IA(250x4.6mm)5µ  
 ARD/K/7804  
 Mobile phase:Hexane/EtOH/TFA:90/10/0.1  
 Flow Rate:1.0 ml/min  
 Solubility:MeOH

Ref :KD/08.01.15/371

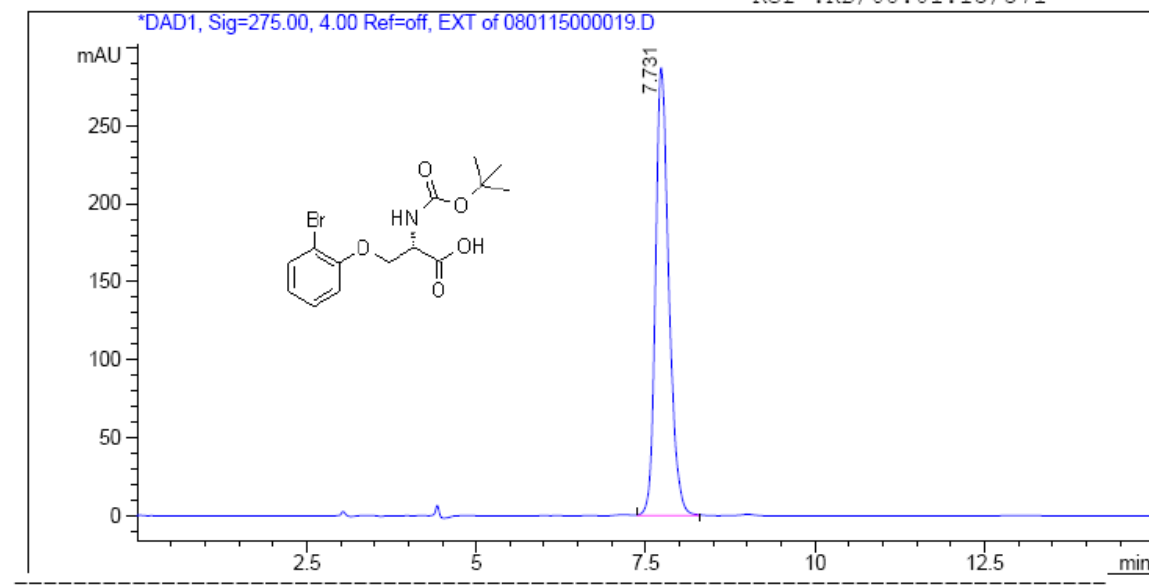

Signal 1: DAD1, Sig=275.00, 4.00 Ref=off, EXT

| Peak # | RT [min] | Area    | Area % |
|--------|----------|---------|--------|
| 1      | 7.73     | 3937.79 | 100.00 |

### Chiral HPLC of L-isomer of compound 3a

Acq Operator : KONDABABU  
 Injection Date : 1/8/2015 3:00:35 PM  
 Acq. Method : C:\Chem32\1\DATA\JAN-2015\080115 2015-01-08 09-48-05->  
 Analysis Method : C:\CHEM32\1\METHODS\A1.M  
 Last Changed : Wed, 7. Jan. 2015, 06:20:38 pm

Location : Vial 38  
 Inj. No. : 1  
 Inj. Vol. : 5 µl

Sample ID:CR211-8259-67D1

Column Name:Chiralpak IA(250x4.6mm) 5µ  
 ARD/K/7804  
 Mobile phase:Hexane/EtOH/TFA:90/10/0.1  
 Flow Rate:1.0 ml/min  
 Solubility:MeOH

Ref :KD/08.01.15/372

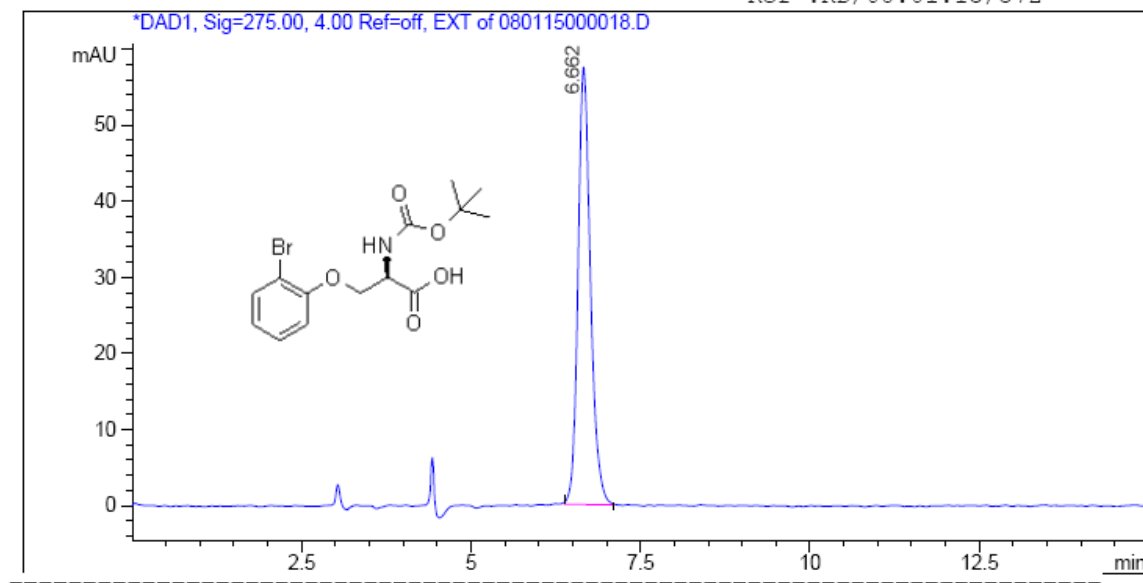

Signal 1: DAD1, Sig=275.00, 4.00 Ref=off, EXT

| Peak # | RT [min] | Area   | Area % |
|--------|----------|--------|--------|
| 1      | 6.66     | 735.45 | 100.00 |

### Chiral HPLC of D-isomer of compound 3a

NAME CR211-0846-010  
 EXPNO 1  
 PROCNO 1  
 F2 20191101  
 Time 2.10  
 INSTRUM spect  
 PROBHD 5 mm QNP 13C-1  
 PULPROG zgpg30  
 TD 32768  
 SOLVENT DMSO  
 NS 8  
 DS 8  
 SWH 8012.820 Hz  
 F2RES 3.124632 Hz  
 AQ 2.0447731 sec  
 RG 201  
 DW 62.490 usec  
 DE 6.50 usec  
 TE 300.0 K  
 D1 1.00000000 sec  
 T00 1

===== CHANNEL f1 =====  
 NUC1 13C  
 P1 14.50 usec  
 PL1 -1.50 dB  
 PL1W 0.2250228 W  
 SFO1 400.152019 MHz  
 SF 400.152020 MHz  
 WDW EM  
 SSB 0  
 LB 0.30 Hz  
 GB 0  
 PC 1.00

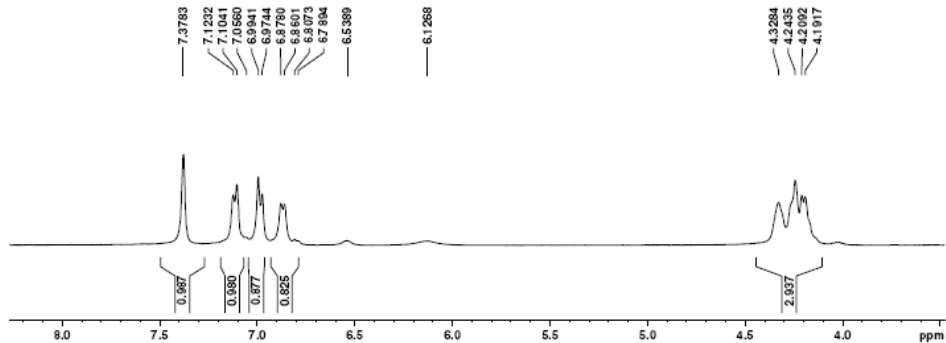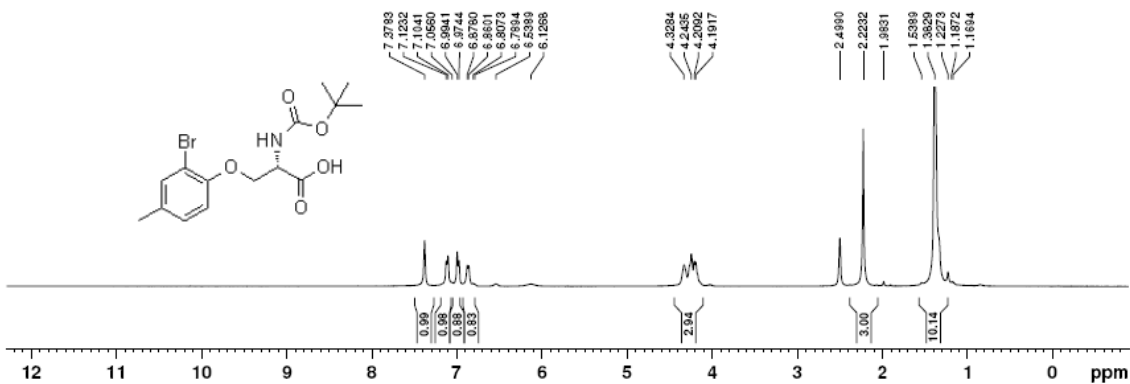

<sup>1</sup>H NMR spectrum (400MHz, DMSO-d<sub>6</sub>) of compound 3b



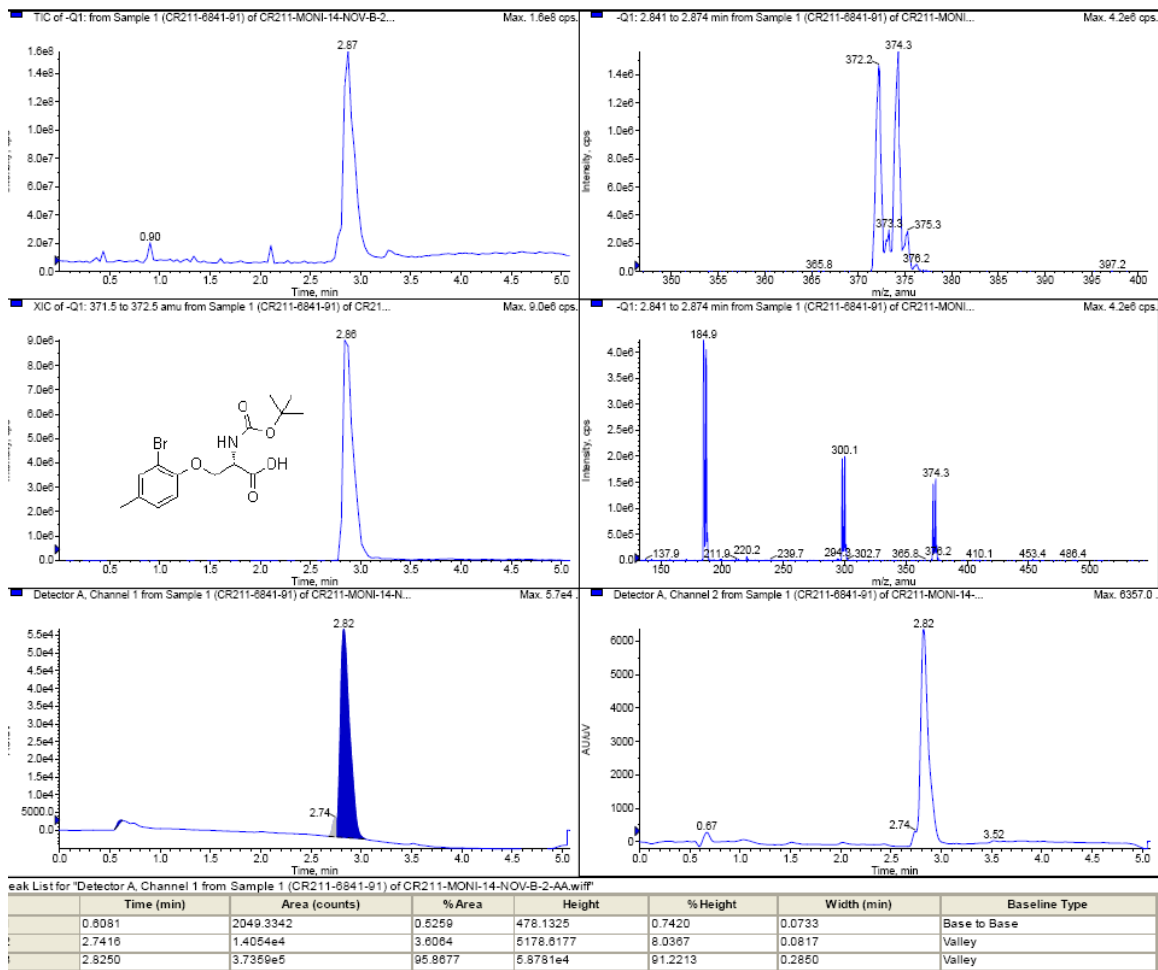

MS MONITORING SAMPLE

\*COLUMN- X-BRIDGE  
ACN: NH4OAc

TCGLS/ARD/LCMS03/K05

channel 1 at wavelength 220 nm  
channel 2 at wavelength 260 nm

Analysed By

Checked By

## LCMS spectrum of compound 3b



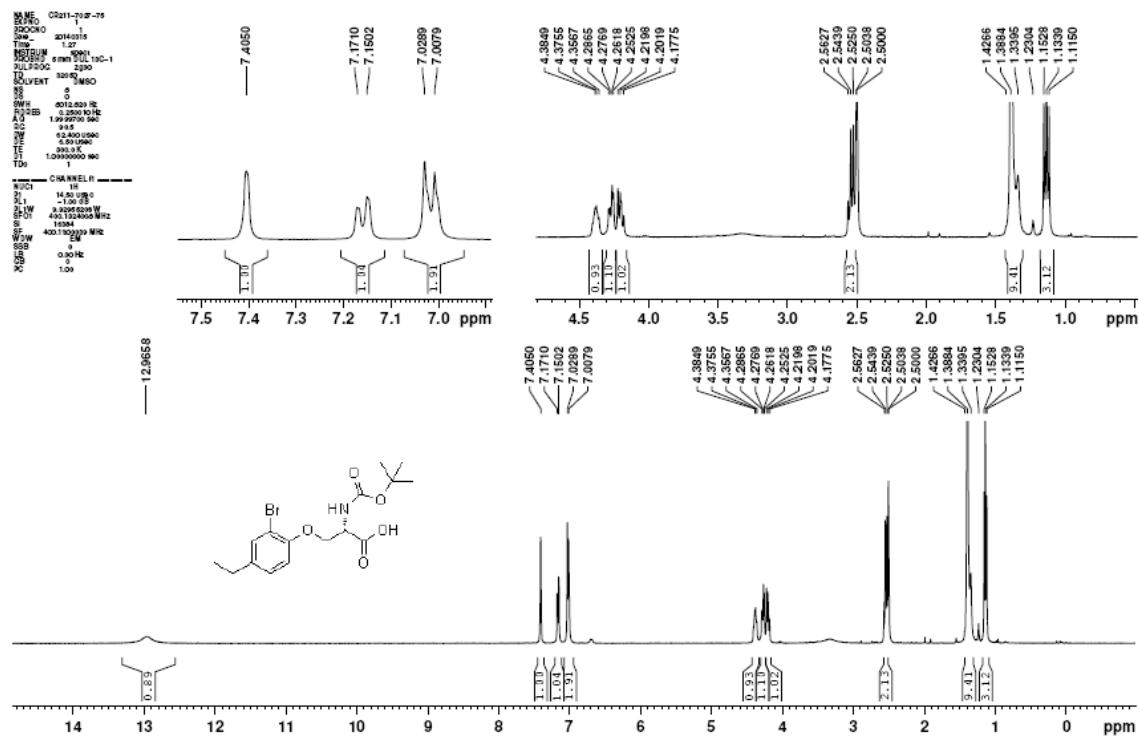

**<sup>1</sup>H NMR spectrum (400MHz, DMSO-d<sub>6</sub>) of compound 3c**

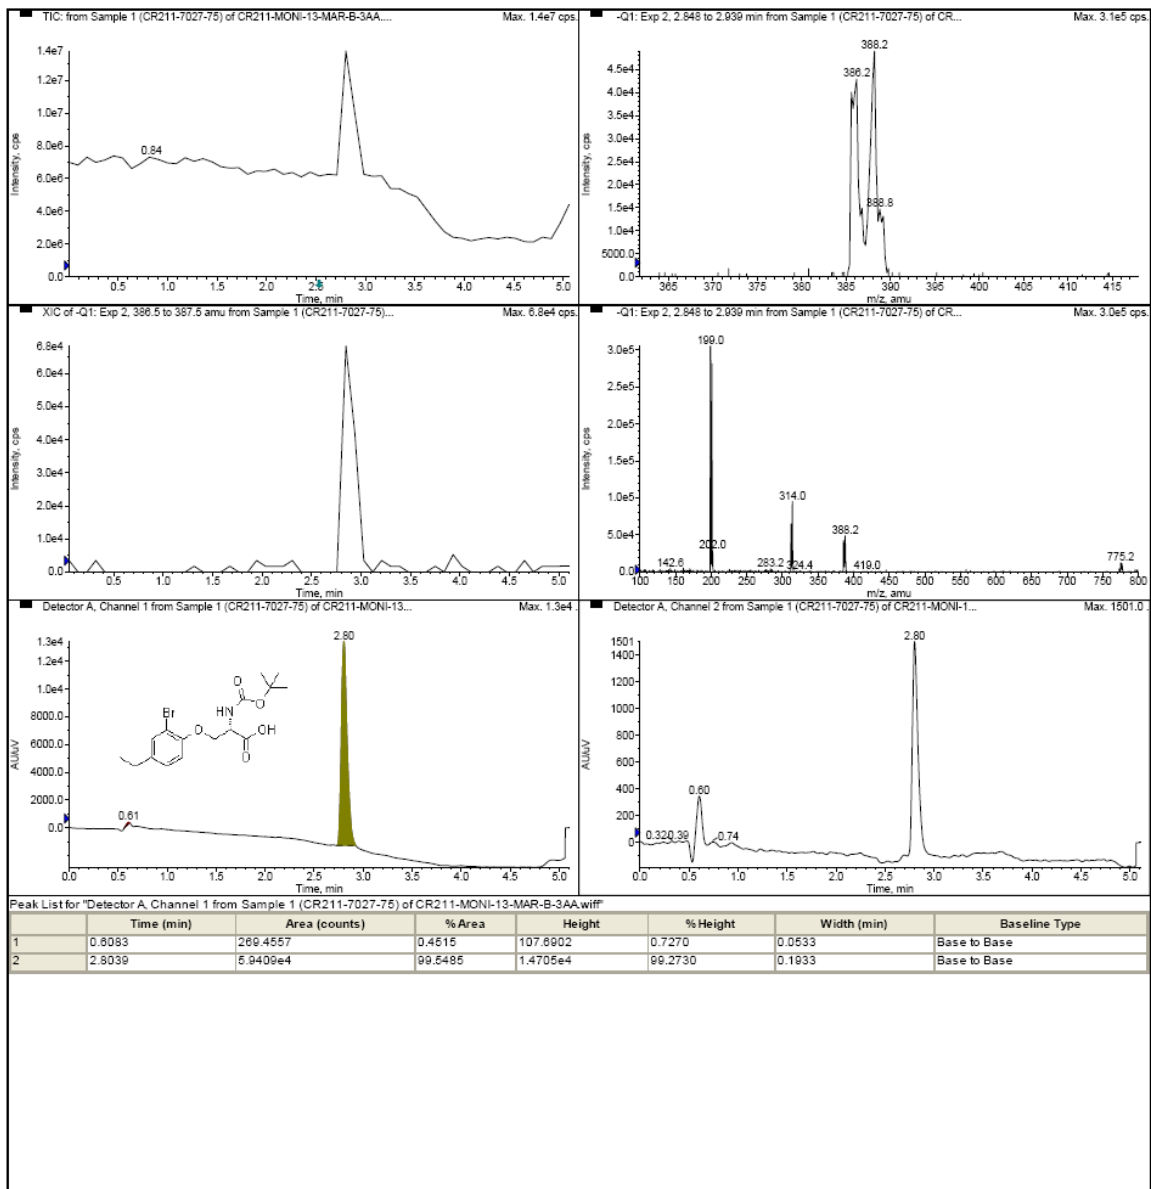

LCMS REACTION MONITORING SAMPLE

COLORIN: Xbridge

TCGLS/ARD/LCIS01/R03

Channel 1 at wavelength 220 nm,  
Channel 2 at wavelength 260 nm

NE40Ac:ACN

Analysed by

## LCMS spectrum of compound 3c

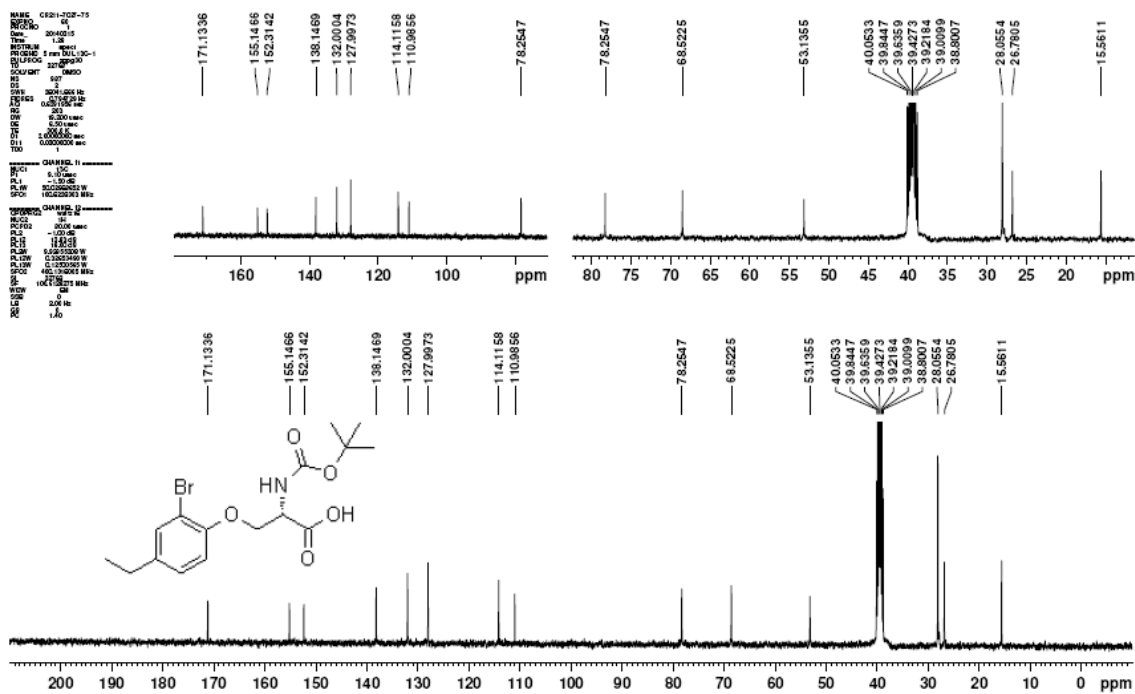

**<sup>13</sup>C NMR spectrum (100MHz, DMSO-d<sub>6</sub>) of compound 3c**

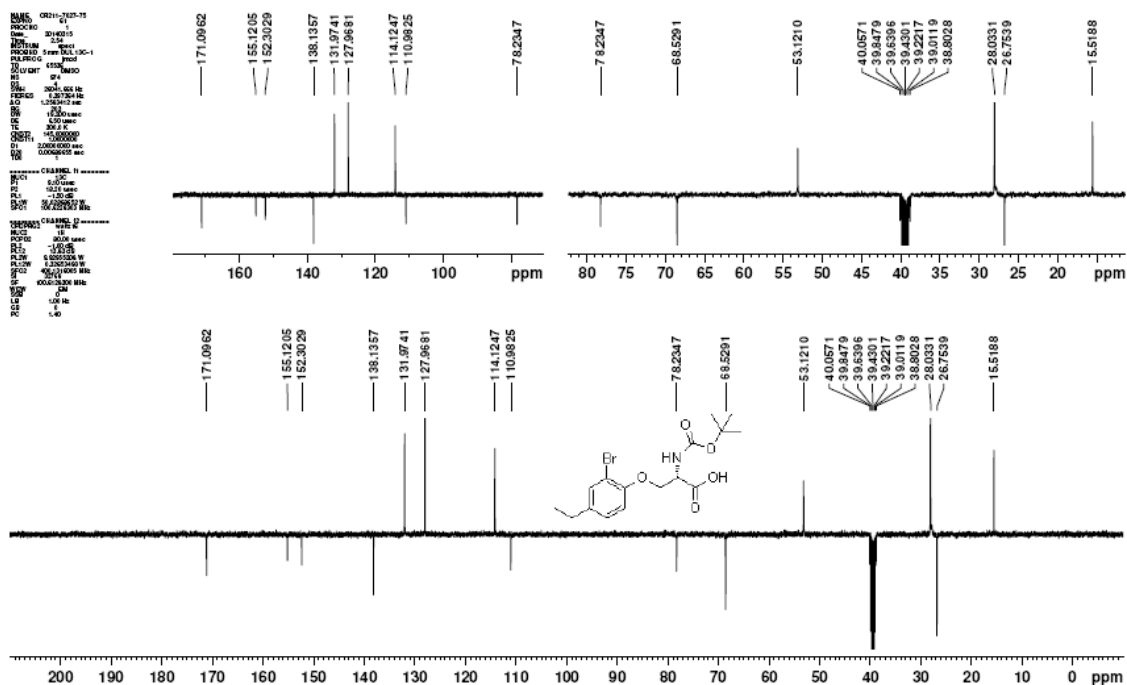

**APT NMR spectrum (100MHz, DMSO-d<sub>6</sub>) of compound 3c**

Acq Operator : KONDABABU Inj. No. : 1  
Injection Date : 12/31/2014 4:33:54 PM Inj. Vol. : 5 µl  
Acq. Method : C:\Chem32\1\DATA\DEC-2014\311214 2014-12-31 10-01-35->  
Analysis Method : C:\CHEM32\1\METHODS\B2.M  
Last Changed : Wed, 31. Dec. 2014, 11:42:13 am  
(modified after loading)  
Sample ID : CR211-7027-75(D+L)

Column Name : Chiralpak IA(250x4.6mm)5µ  
ARD/K/7804  
Flow Rate : 1.0ml/min  
Mobile Phase : Hexane/ETOH/TFA : 90/10/0.1  
Solubility : MeOH

Ref :KD/31.12.14/1668

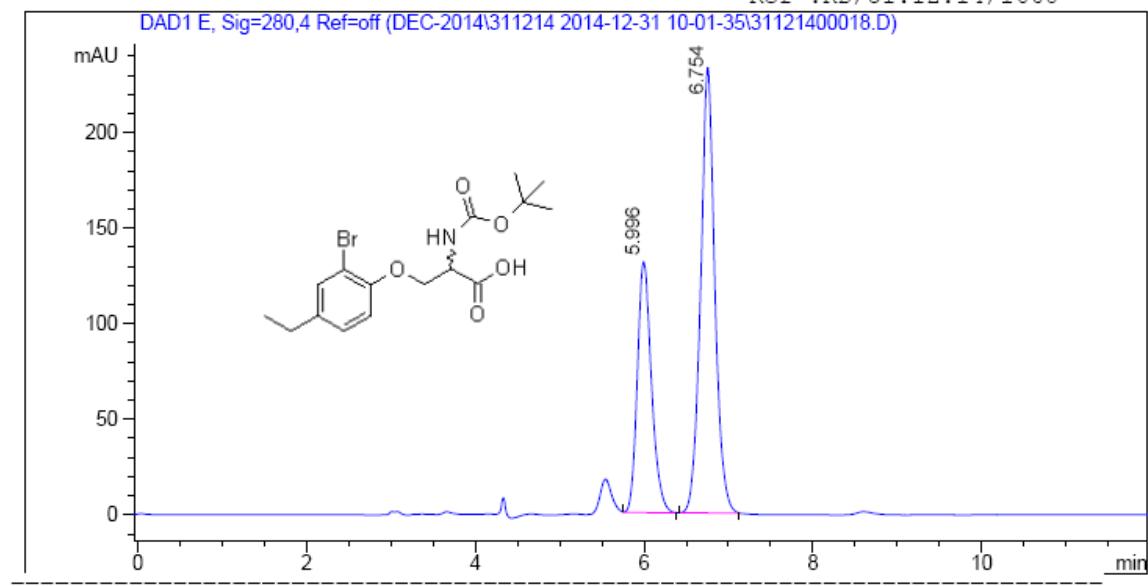

Signal 1: DAD1 E, Sig=280,4 Ref=off

| Peak # | RT [min] | Area    | Area % |
|--------|----------|---------|--------|
| 1      | 6.00     | 1525.69 | 35.89  |
| 2      | 6.75     | 2724.89 | 64.11  |

**Chiral HPLC of a mixture of D- and L-isomer of compound 3c prepared by external mixing (not racemic mixture)**

Acq Operator : KONDABABU  
 Injection Date : 12/31/2014 5:00:06 PM  
 Acq. Method : C:\Chem32\1\DATA\DEC-2014\311214 2014-12-31 10-01-35->  
 Analysis Method : C:\CHEM32\1\METHODS\B2.M  
 Last Changed : Wed, 31. Dec. 2014, 05:12:43 pm  
 (modified after loading)  
 Sample ID : CR211-7027-75L

Location : Vial 9  
 Inj. No. : 1  
 Inj. Vol. : 5 µl

Column Name : Chioralpak IA(250x4.6mm) 5µ  
 ARD/K/7804  
 Flow Rate : 1.0ml/min  
 Mobile Phase : Hexane/ETOH/TFA : 90/10/0.1  
 Solubility : MeOH

Ref :KD/31.12.14/1671

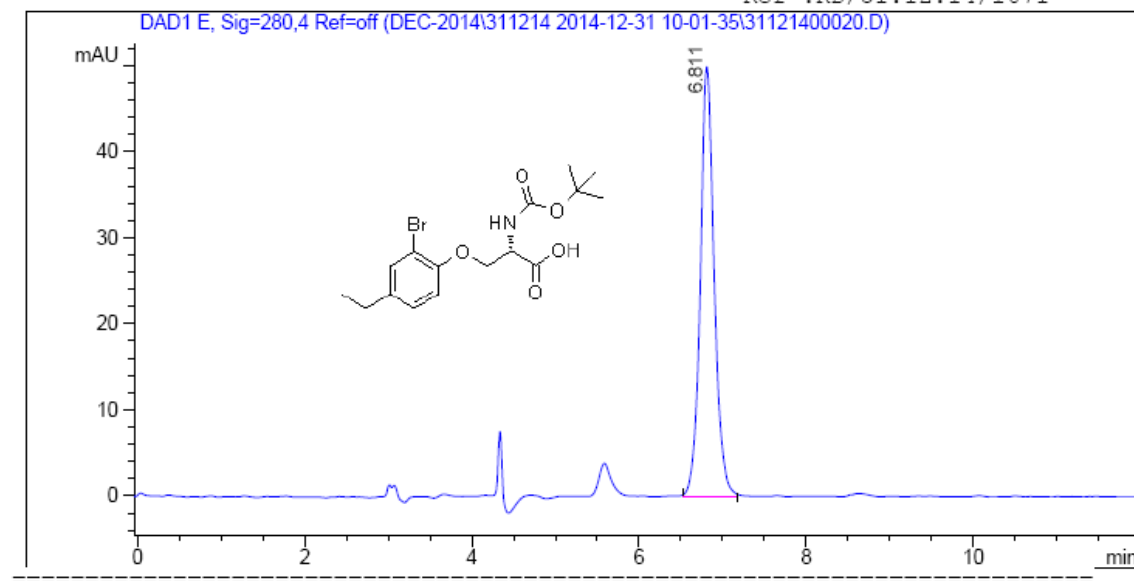

Signal 1: DAD1 E, Sig=280,4 Ref=off

| Peak # | RT [min] | Area   | Area % |
|--------|----------|--------|--------|
| 1      | 6.81     | 573.96 | 100.00 |

**Chiral HPLC of L-isomer of compound 3c**

Acq Operator : KONDABABU  
 Injection Date : 12/31/2014 4:47:00 PM  
 Acq. Method : C:\Chem32\1\DATA\DEC-2014\311214 2014-12-31 10-01-35->  
 Analysis Method : C:\CHEM32\1\METHODS\B2.M  
 Last Changed : Wed, 31. Dec. 2014, 11:42:13 am  
 (modified after loading)  
 Sample ID : CR211-7027-75D

Location : Vial 8  
 Inj. No. : 1  
 Inj. Vol. : 5 µl

Column Name : Chioralpak IA(250x4.6mm)5µ  
 ARD/K/7804  
 Flow Rate : 1.0ml/min  
 Mobile Phase : Hexane/ETOH/TFA : 90/10/0.1  
 Solubility : MeOH

Ref :KD/31.12.14/1670

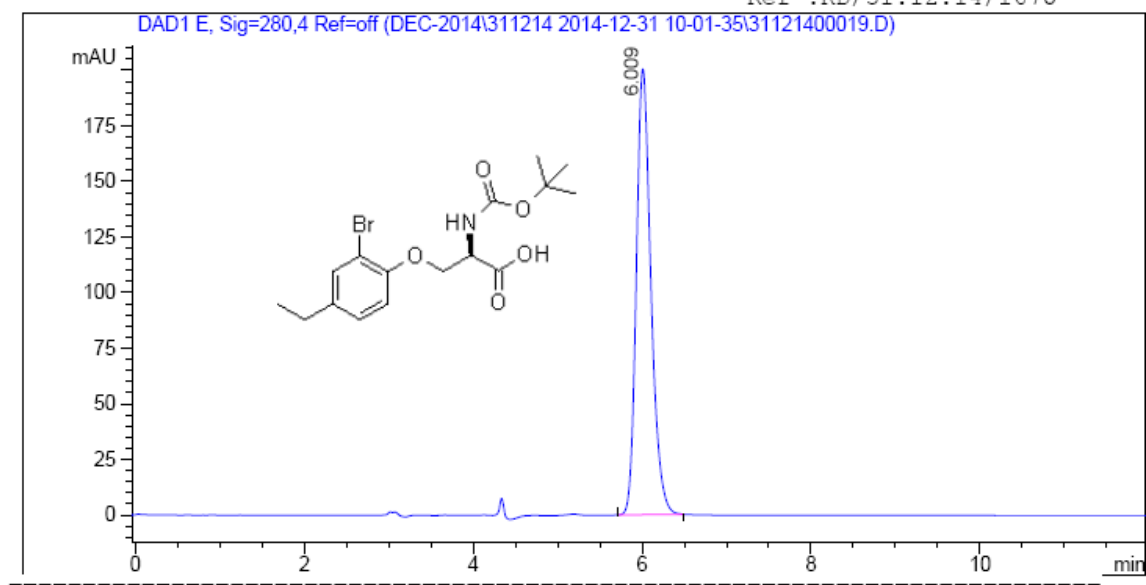

Signal 1: DAD1 E, Sig=280,4 Ref=off

| Peak # | RT [min] | Area    | Area % |
|--------|----------|---------|--------|
| 1      | 6.01     | 2404.71 | 100.00 |

### Chiral HPLC of D-isomer of compound 3c



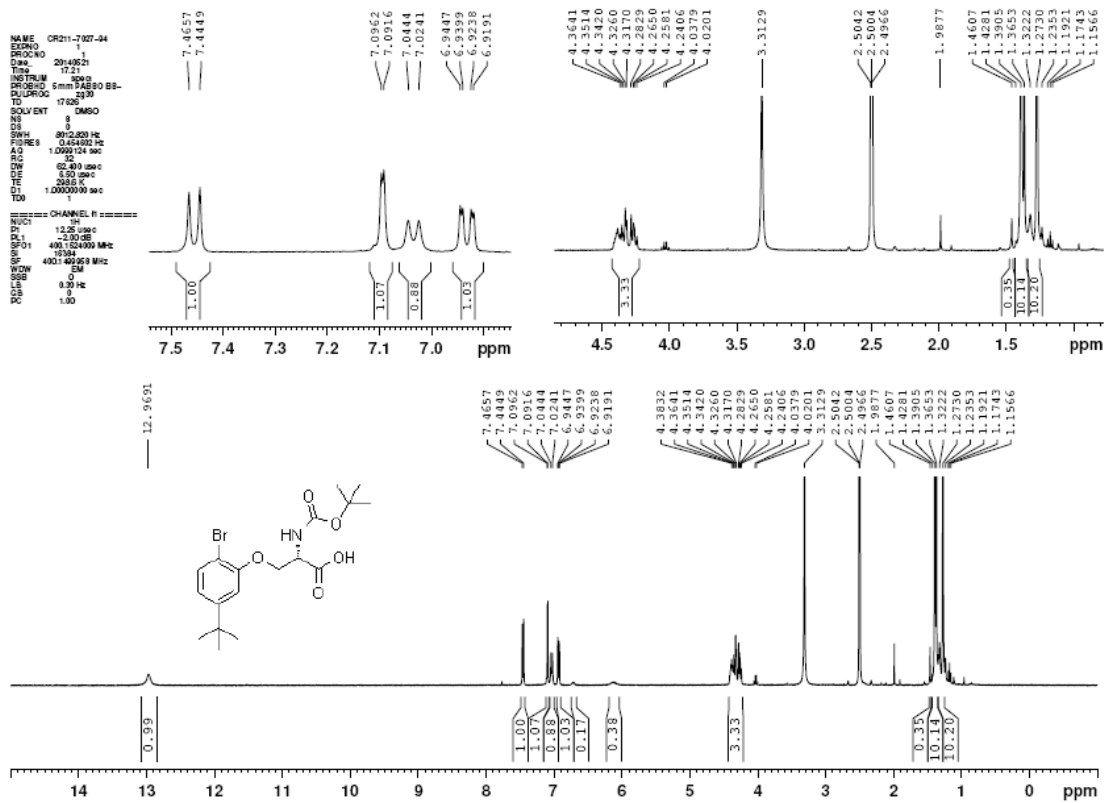

<sup>1</sup>H NMR spectrum (400MHz, DMSO-d<sub>6</sub>) of compound 3d

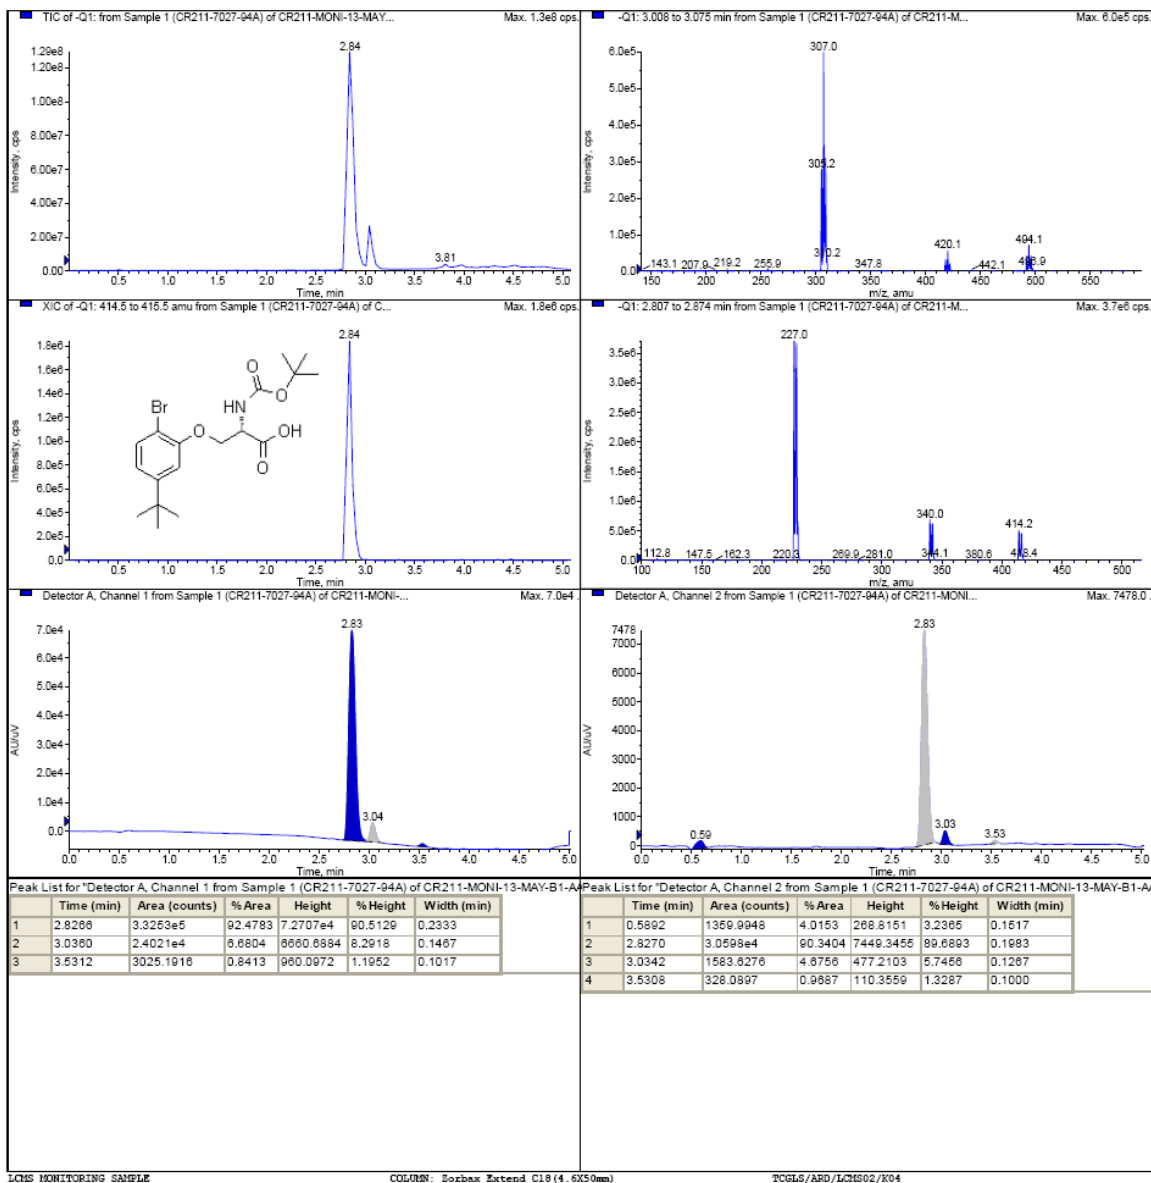

Channel 1 at wavelength 220 nm,  
Channel 2 at wavelength 260 nm

NB40Ac:ACN

Analysed by

## LCMS spectrum of compound 3d

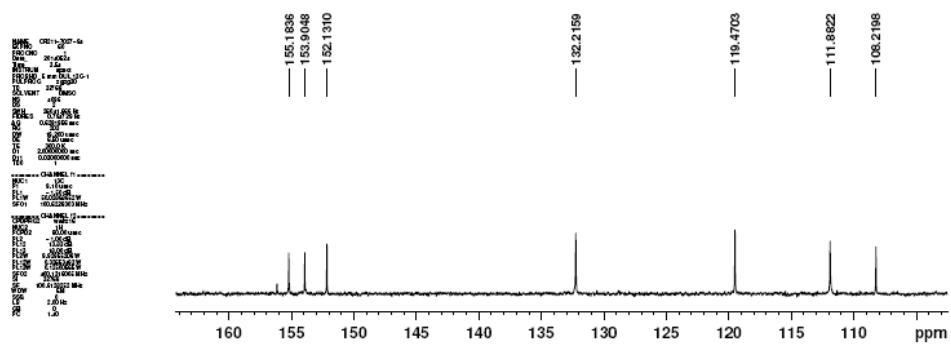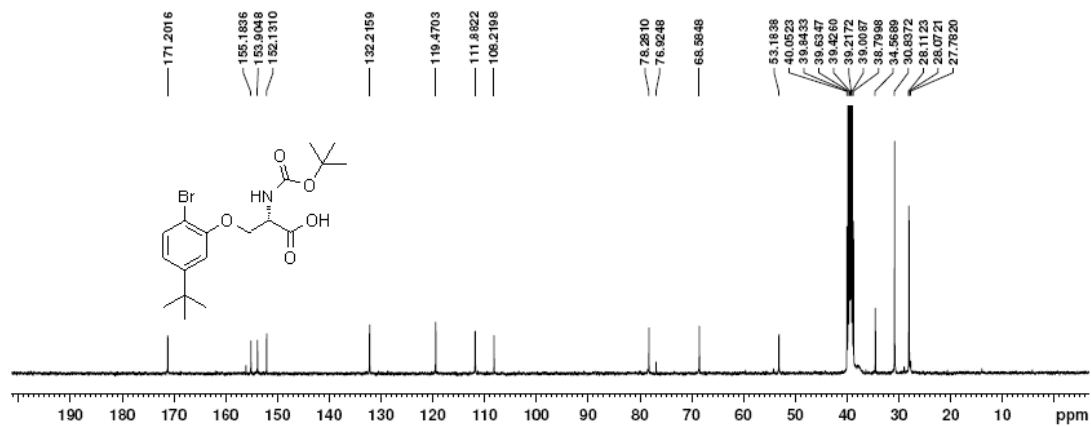

<sup>13</sup>C NMR spectrum (100MHz, DMSO-d<sub>6</sub>) of compound 3d

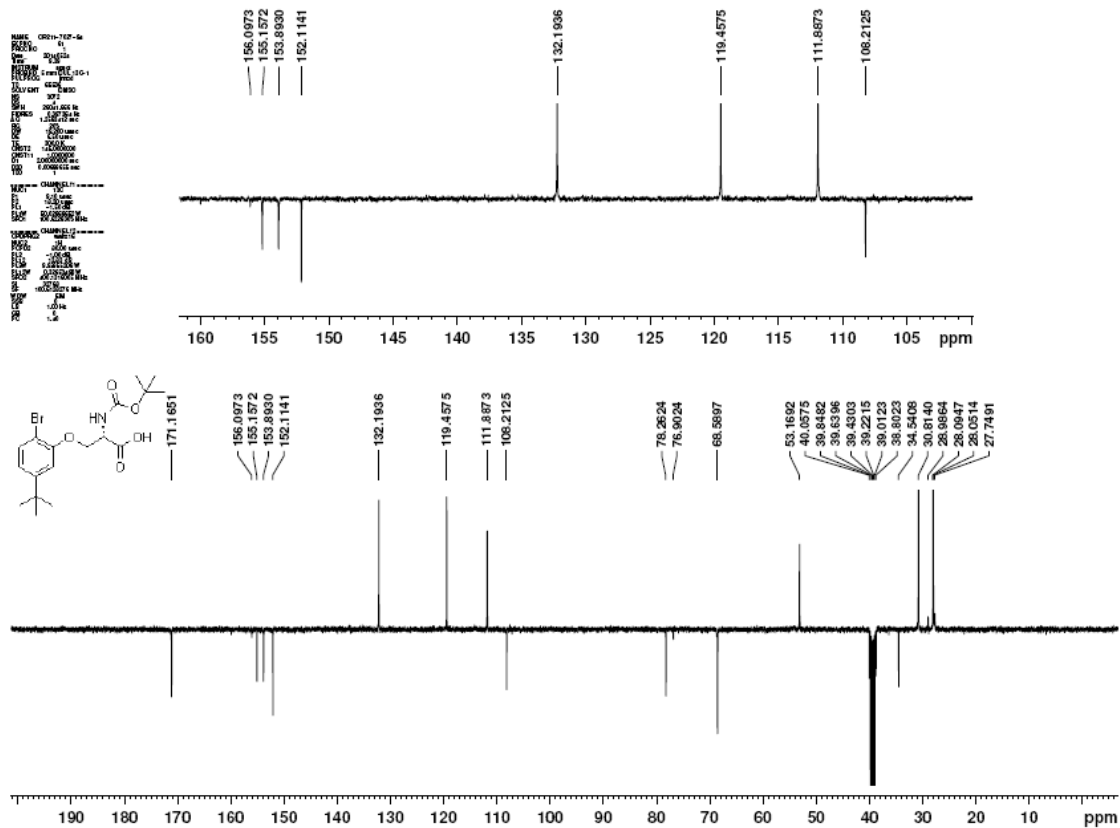

APT NMR spectrum (100MHz, DMSO-d<sub>6</sub>) of compound 3d

NAME CR215-6841-87  
EXPNO 1  
PROCNO 1  
Date\_ 20140220  
Time 13.24  
INSTRUM spect  
PROBHD 5 mm PABBO BB-  
PULPROG zg30  
TD 24996  
SOLVENT DMSO  
NS 8  
DS 0  
SWH 10001.000 Hz  
FIDRES 0.415943 Hz  
AQ 1.2016601 sec  
RG 328  
DQ 0.0000000  
DE 6.50 umc  
TE 300.4 K  
DS 1.9330000 sec  
TD0 1

===== CHANNEL f1 =====  
NUC1 1H  
P1 12.25 umc  
PL1 -2.00 dB  
SFO1 400.1524000 MHz  
F 16384  
SF 400.1462658 MHz  
WDW EM  
SSB 0  
LB 0.30 Hz  
GB 0  
PC 1.00

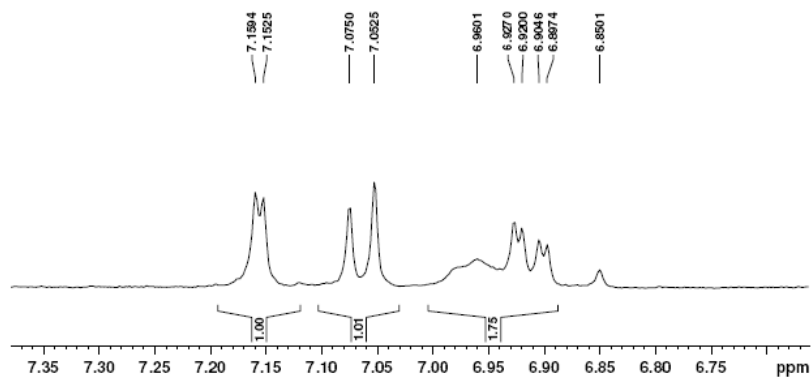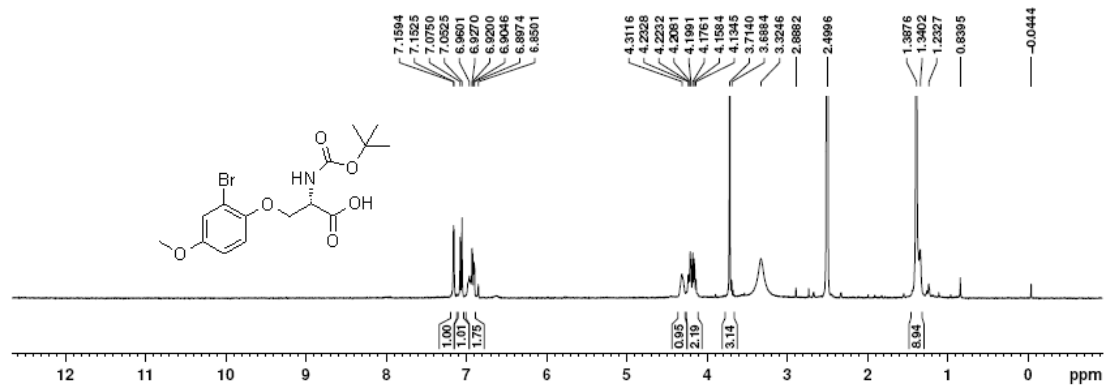

<sup>1</sup>H NMR spectrum (400MHz, DMSO-d<sub>6</sub>) of compound 3e

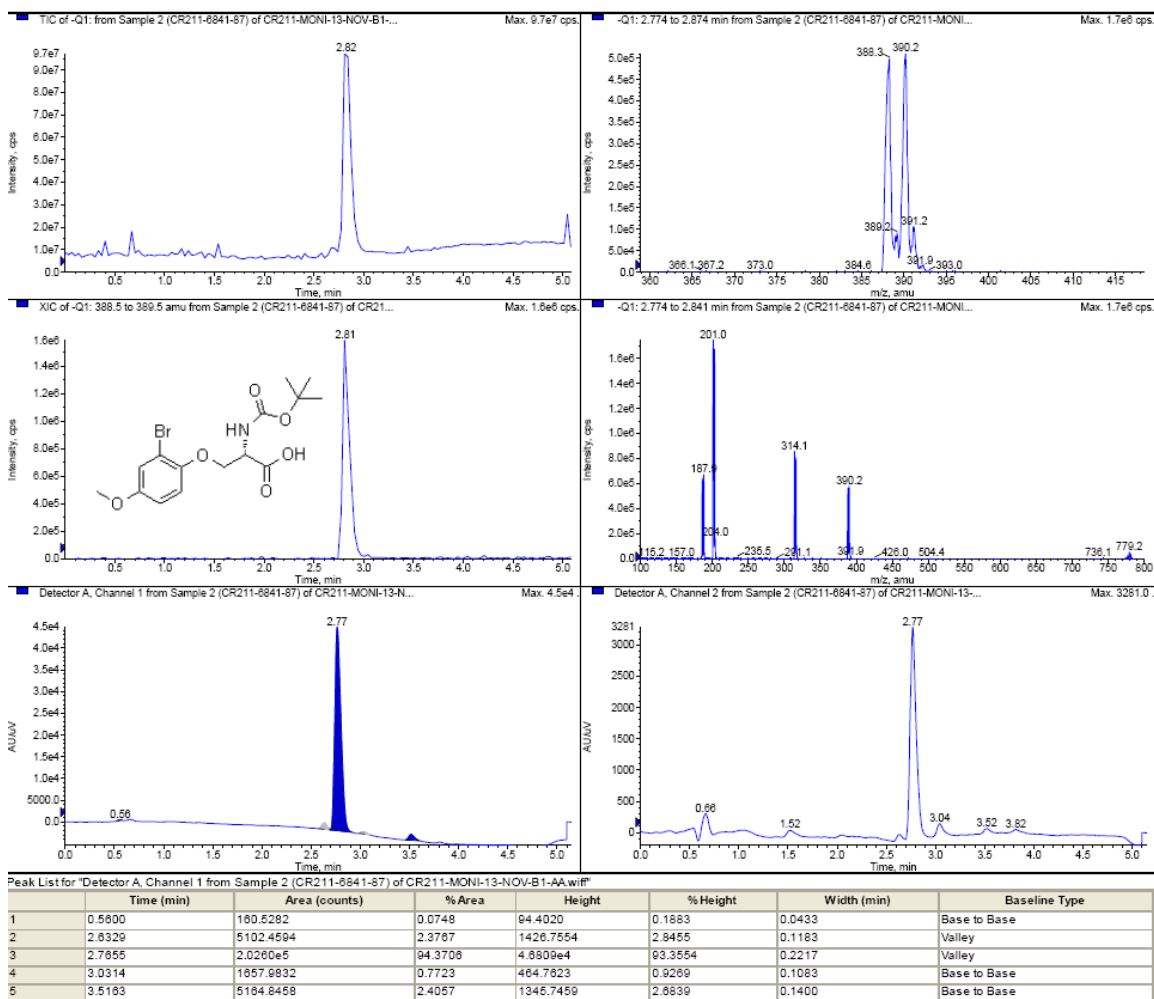

LCMS MONITORING SAMPLE

\*COLUMN- X-BRIDGE  
ACN: 98:02

TCGLS/ARD/LCMS03/K05

Channel 1 at wavelength 220 nm  
Channel 2 at wavelength 260 nm

Analyzed By

Checked By

## LCMS spectrum of compound 3e

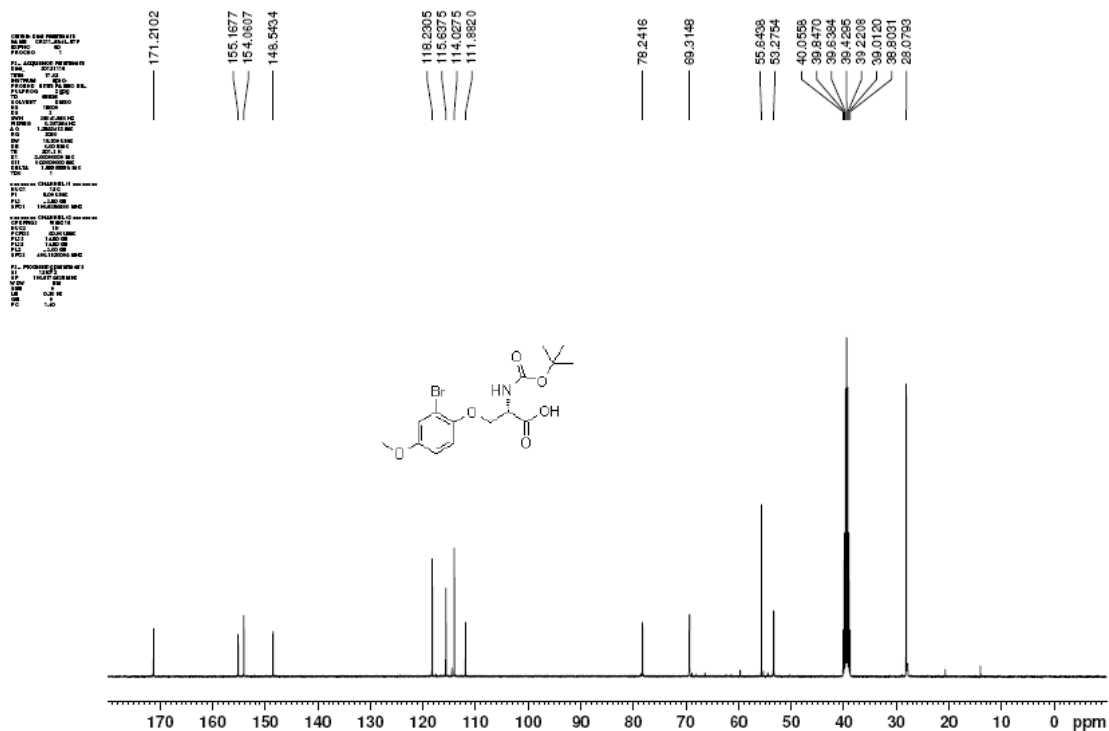

<sup>13</sup>C NMR spectrum (100MHz, DMSO-d<sub>6</sub>) of compound 3e

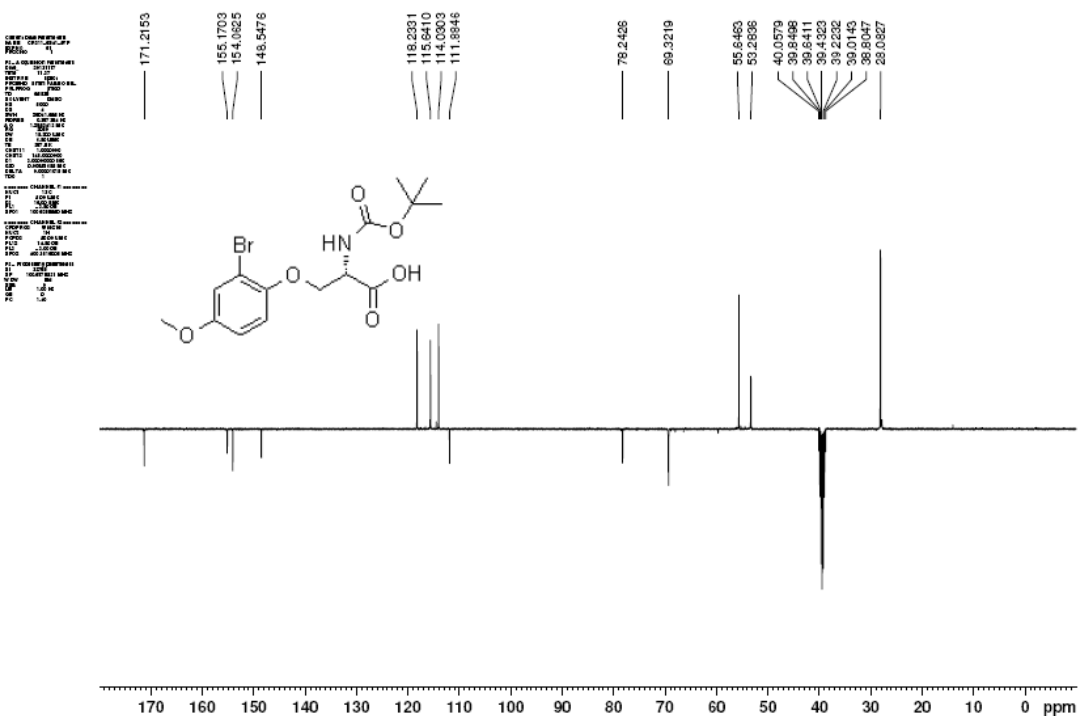

APT NMR spectrum (100MHz, DMSO-d<sub>6</sub>) of compound 3e

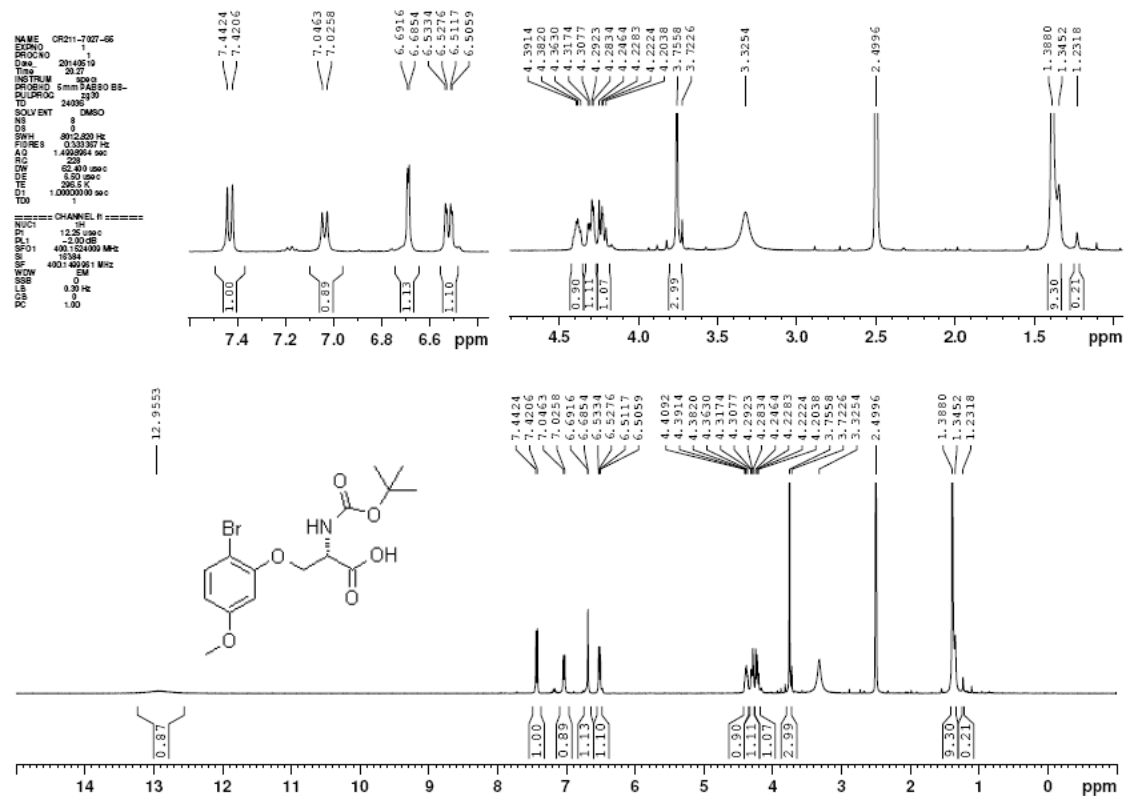

<sup>1</sup>H NMR spectrum (400MHz, DMSO-d<sub>6</sub>) of compound 3f



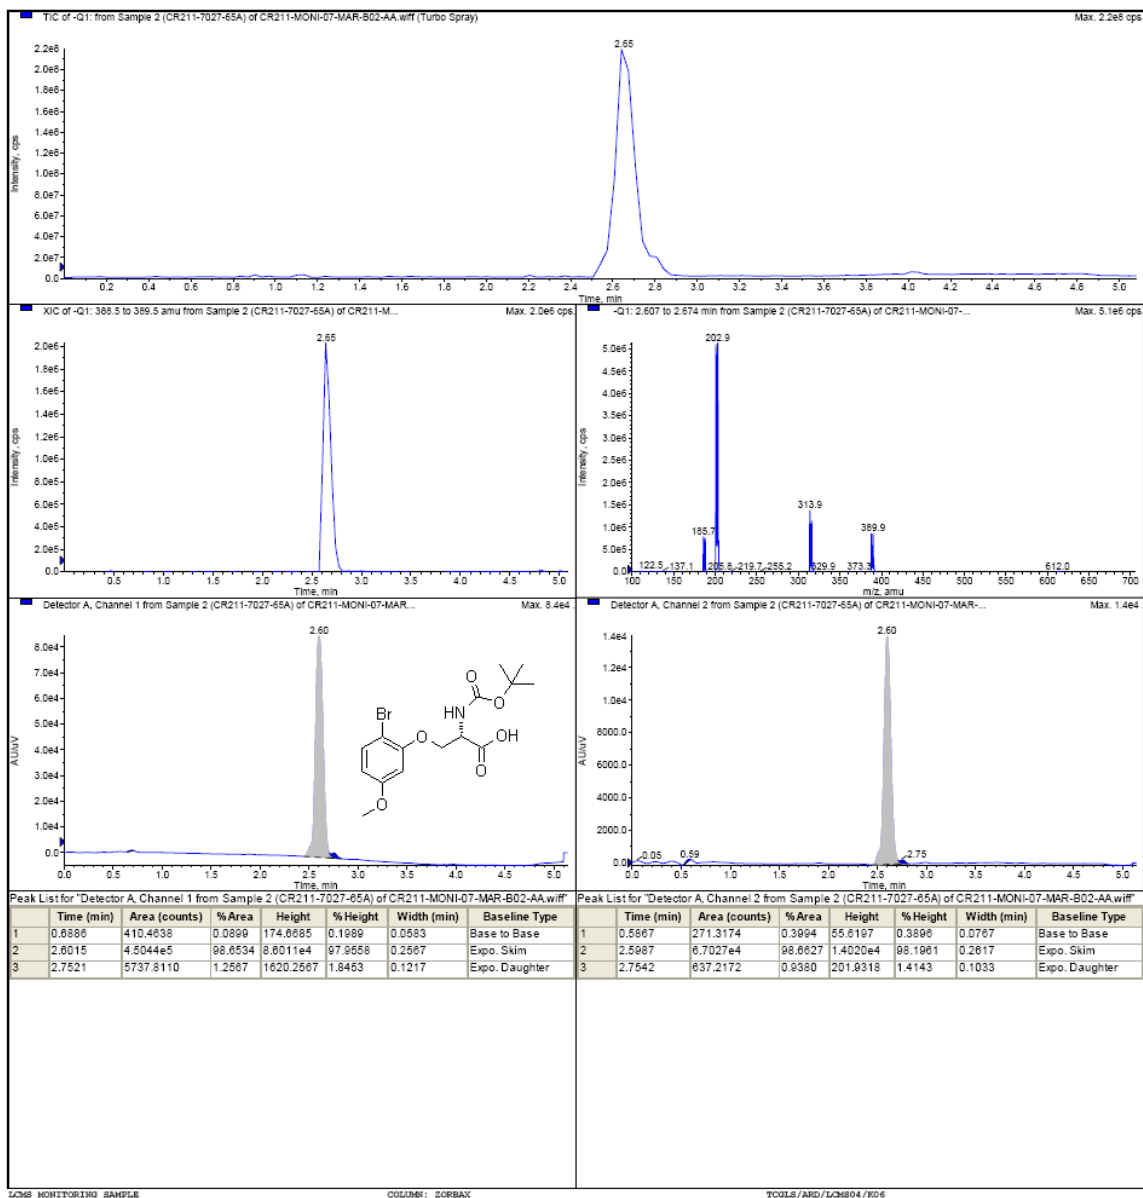

Channel 1 at wavelength 220 nm,  
Channel 2 at wavelength 260 nm

HH40A0:ACH

Analyzed by

## LCMS spectrum of compound 3f

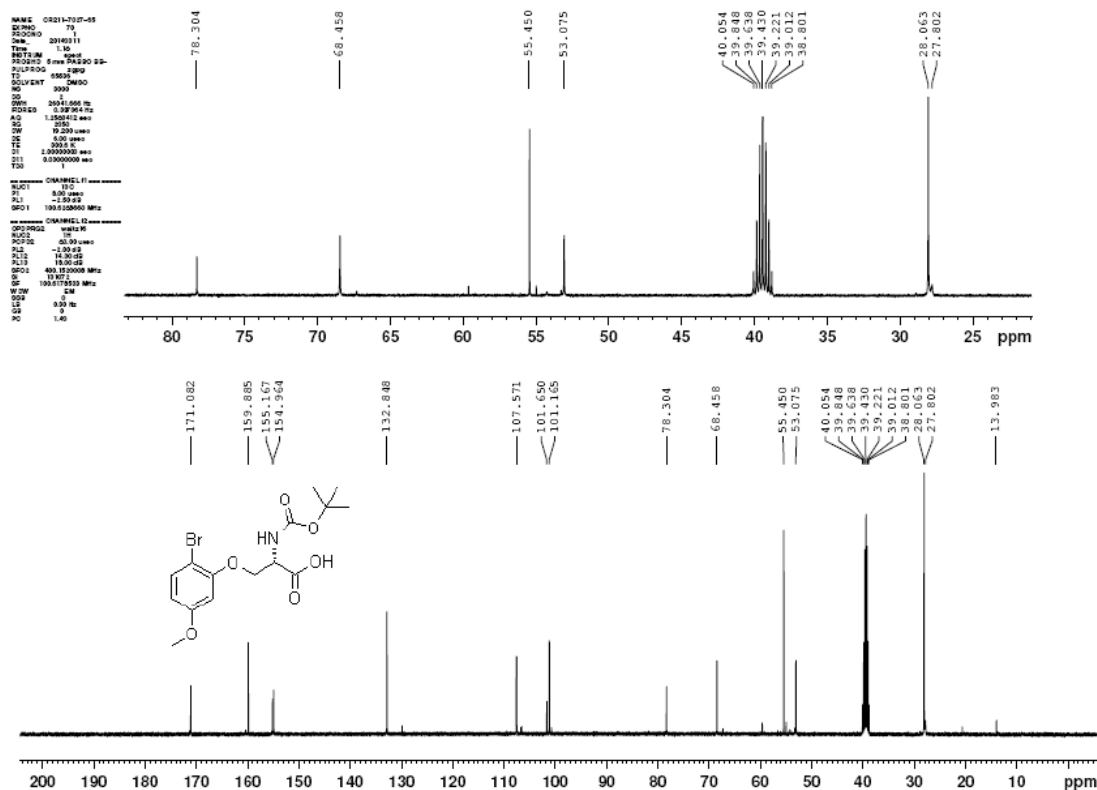

**<sup>13</sup>C NMR spectrum (100MHz, DMSO-d<sub>6</sub>) of compound 3f**

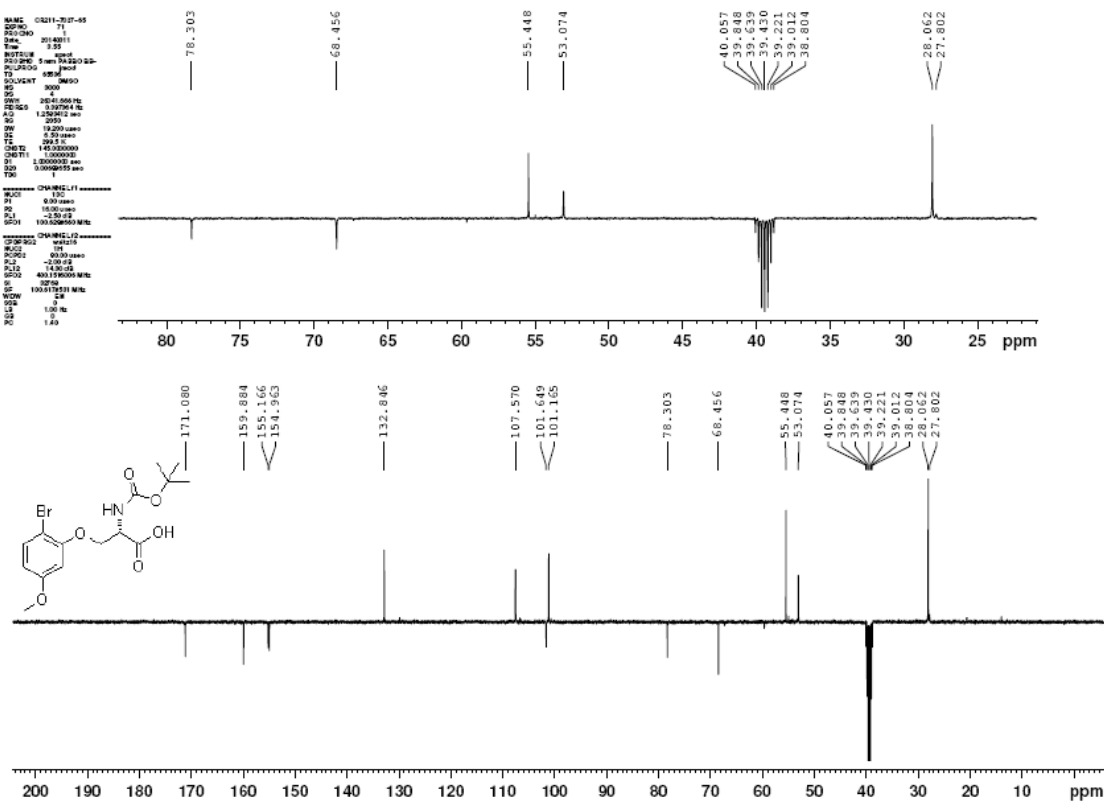

**APT NMR spectrum (100MHz, DMSO-d<sub>6</sub>) of compound 3f**

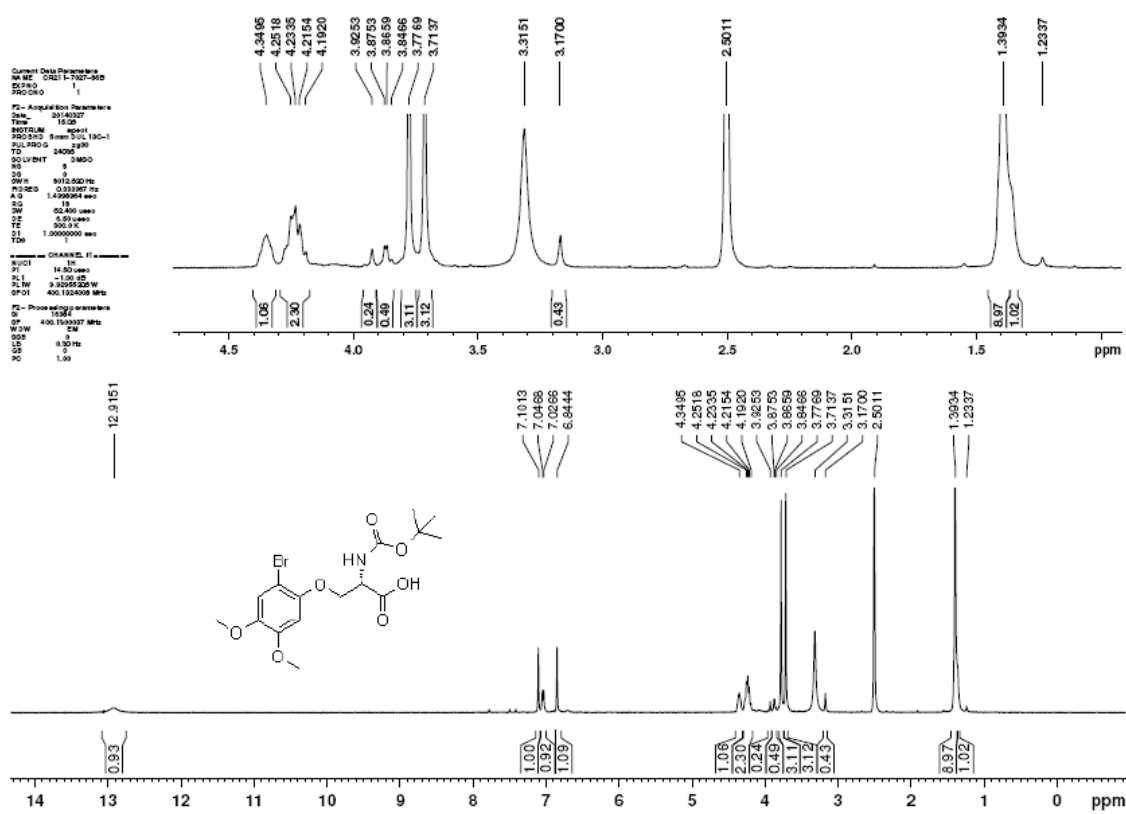

<sup>1</sup>H NMR spectrum (400MHz, DMSO-d<sub>6</sub>) of compound 3g

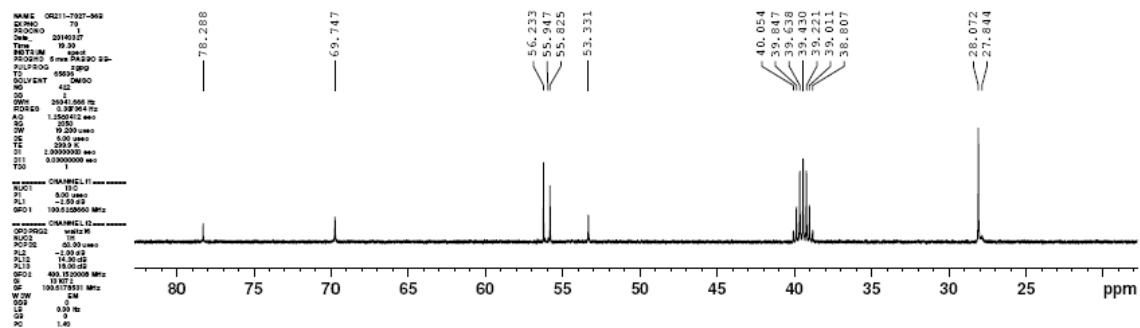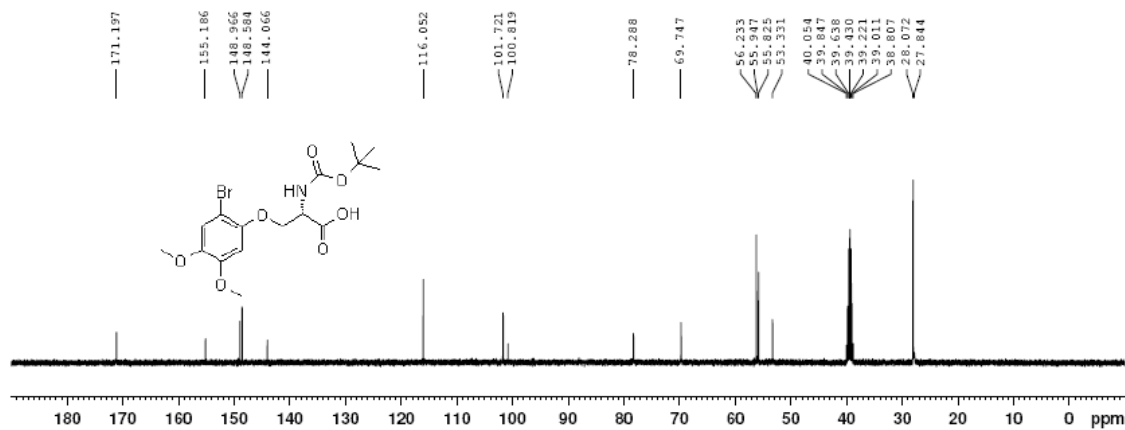

**<sup>13</sup>C NMR spectrum (100MHz, DMSO-d<sub>6</sub>) of compound 3g**

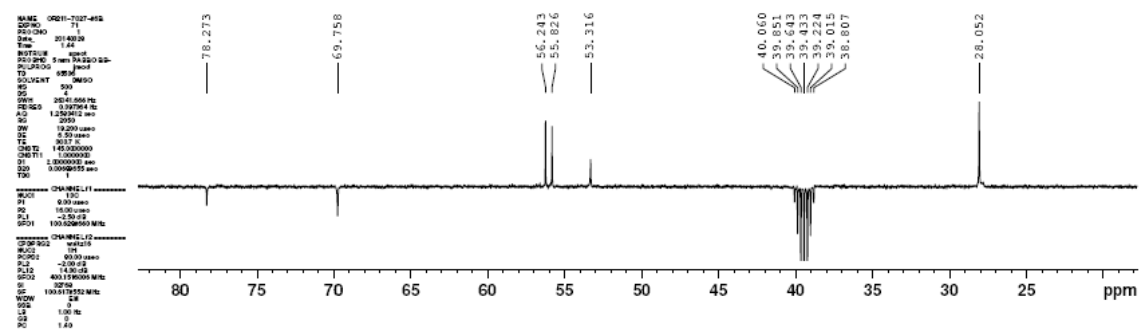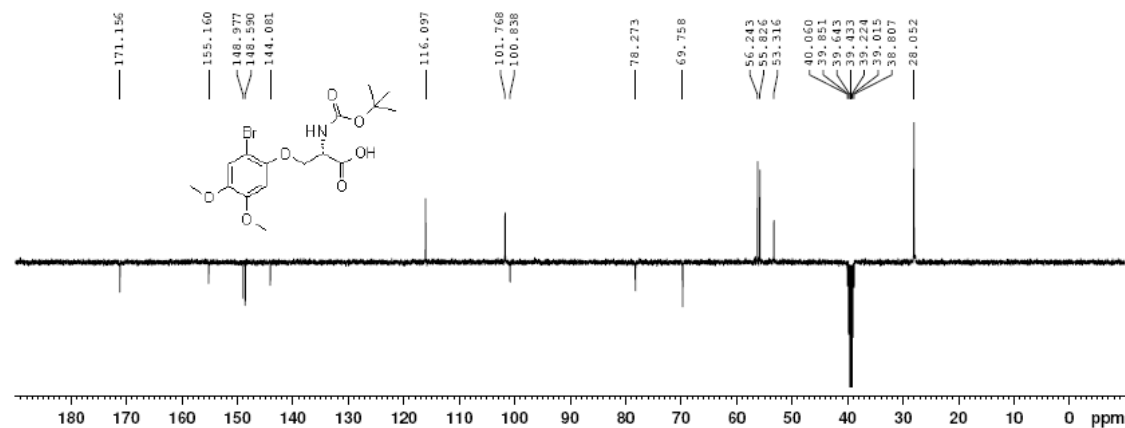

**APT NMR spectrum (100MHz, DMSO-d<sub>6</sub>) of compound 3g**

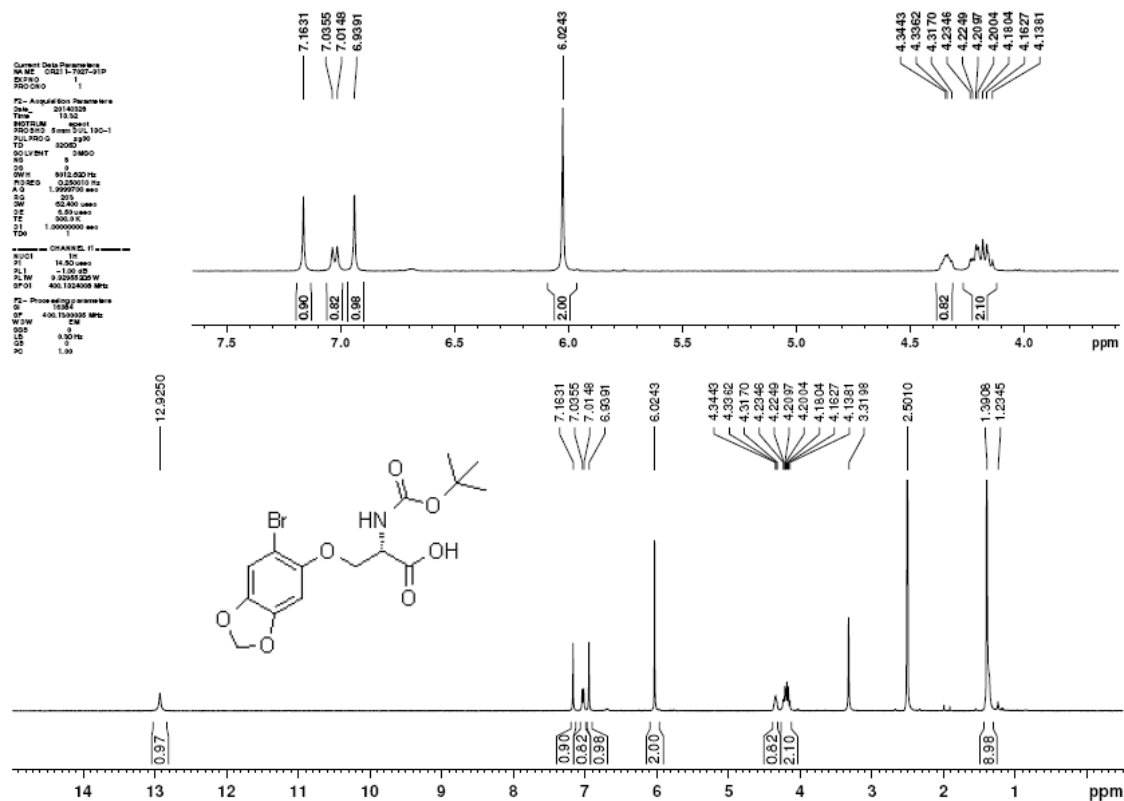

$^1\text{H}$  NMR spectrum (400MHz,  $\text{DMSO-d}_6$ ) of compound 3h

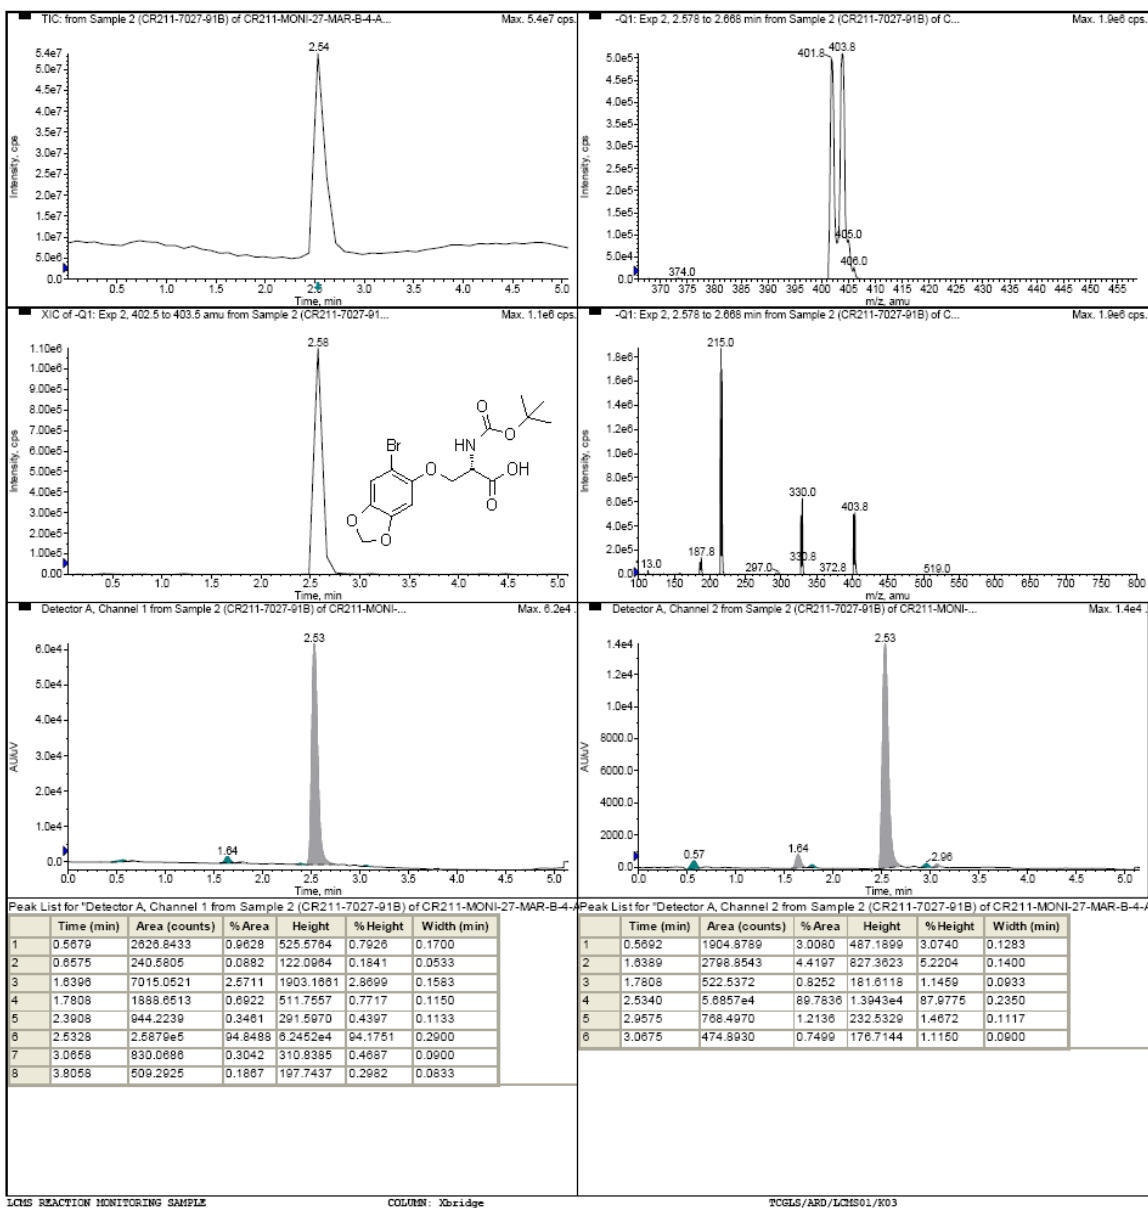

Channel 1 at wavelength 220 nm,  
Channel 2 at wavelength 260 nm

MS40Ac:ACN

Analysed by

## LCMS spectrum of compound 3h

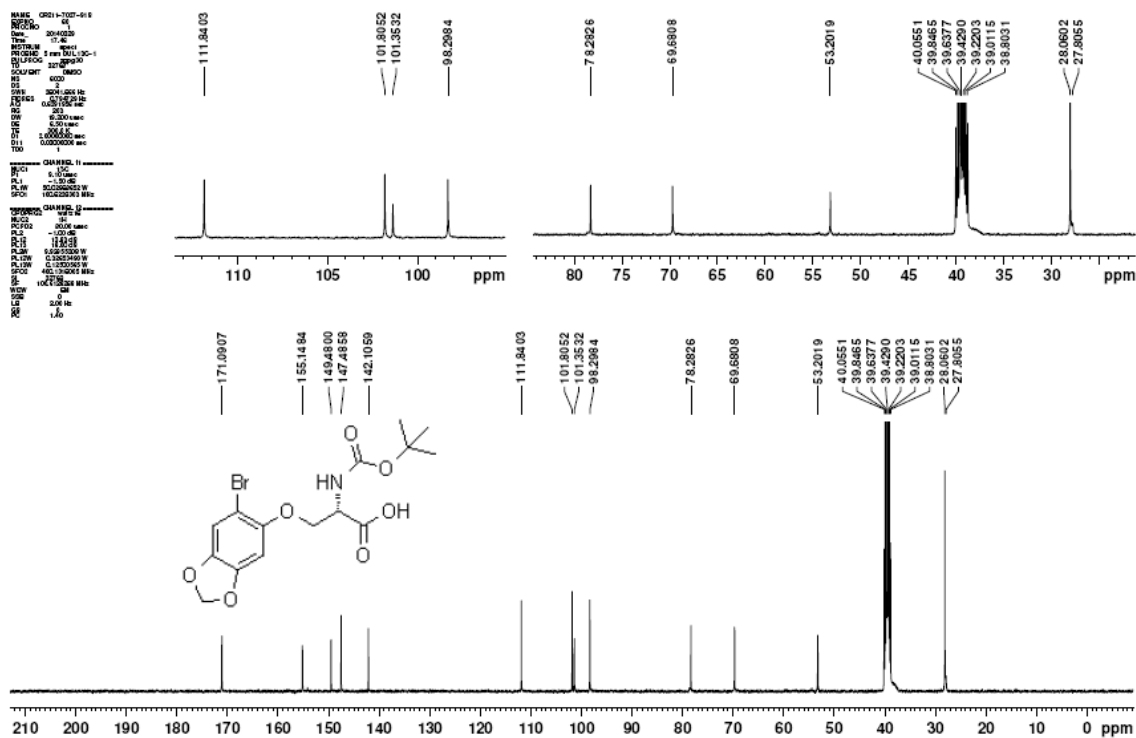

**<sup>13</sup>C NMR spectrum (100MHz, DMSO-d<sub>6</sub>) of compound 3h**

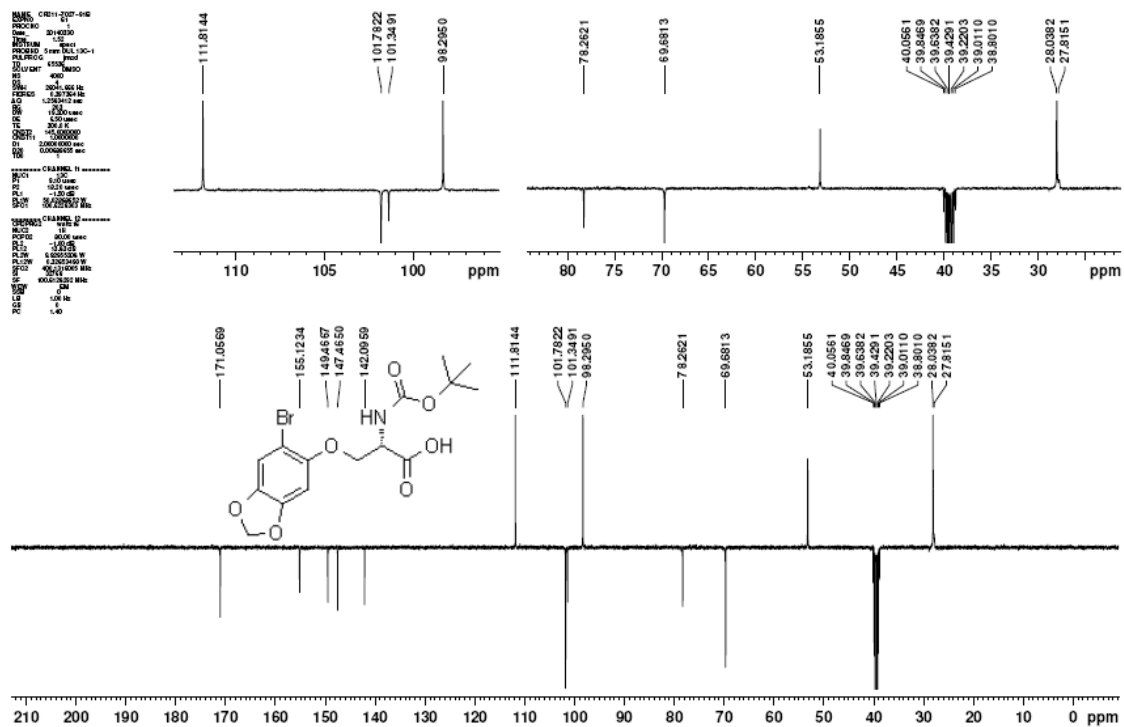

**APT NMR spectrum (100MHz, DMSO-d<sub>6</sub>) of compound 3h**

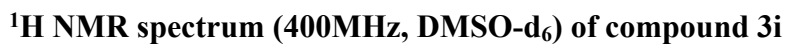



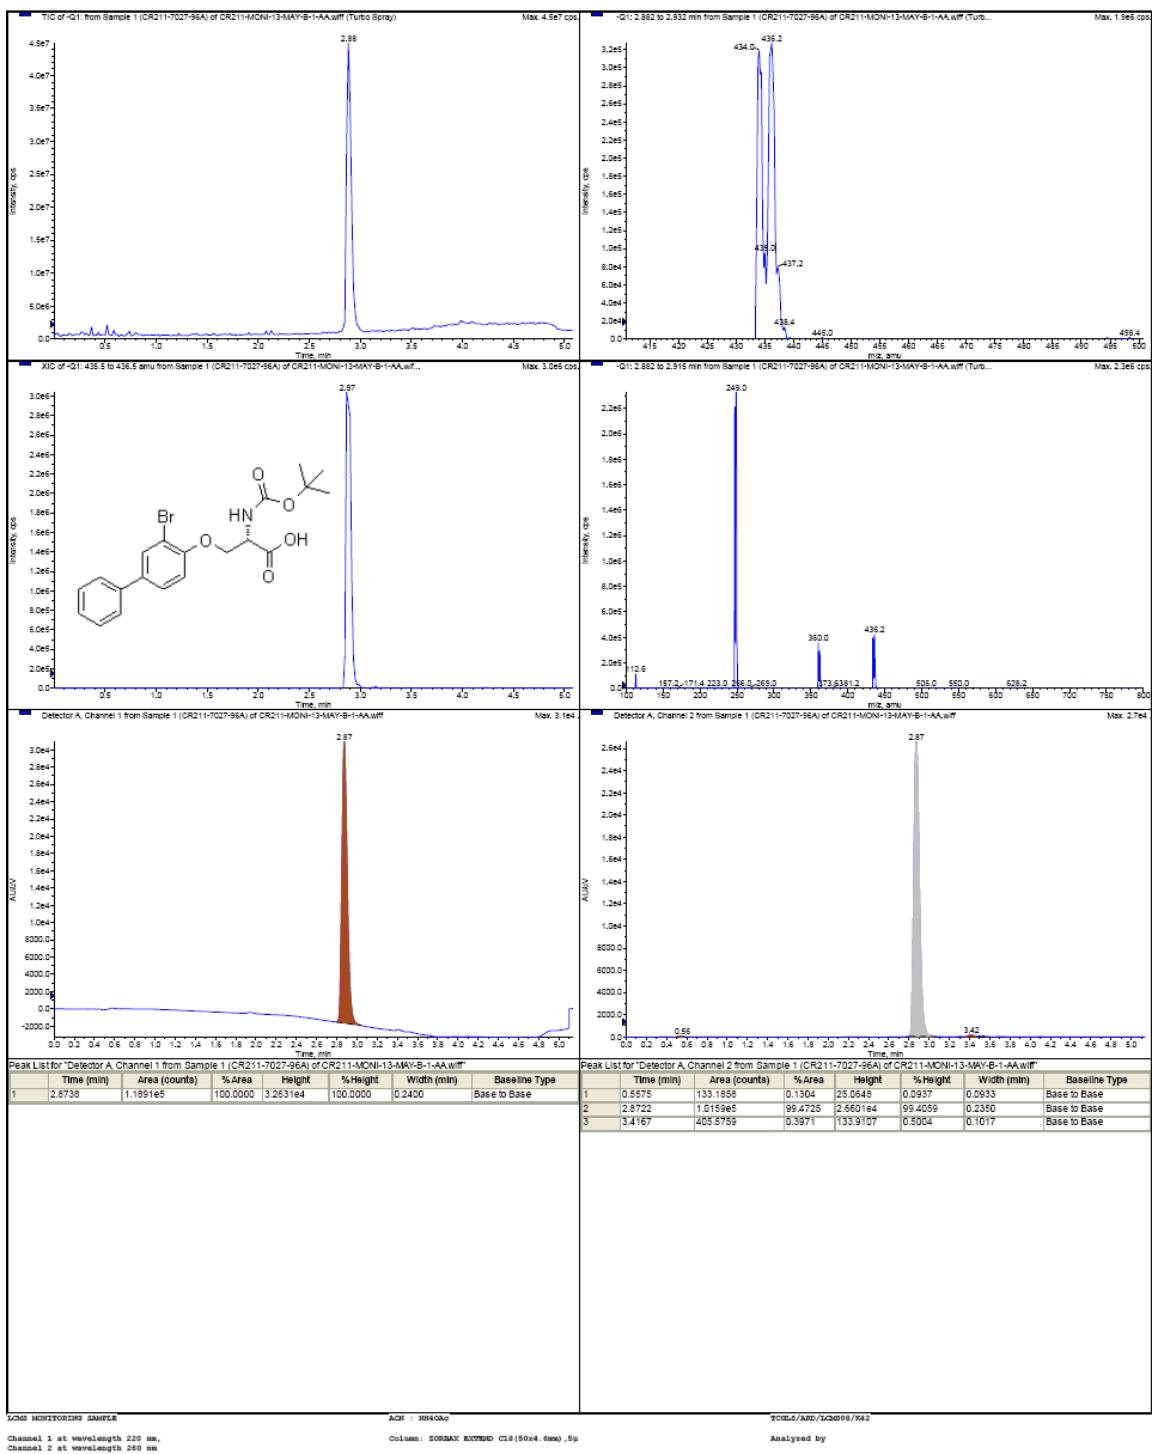

LCMS spectrum of compound 3i

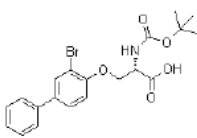

NAME ORZ-1-TCO-SEA  
EXPNO 4  
PROCNO 1  
F2 201.4715  
SOLVENT DMSO  
INSTRUM spect  
PROBHD 5mm QNP-1  
PULPROG zgpg30  
TD 65536  
F2AQ 100  
AQ 100  
RG 327.5  
R1 0.00000000  
R2 0.00000000  
R3 0.00000000  
R4 0.00000000  
R5 0.00000000  
R6 0.00000000  
R7 0.00000000  
R8 0.00000000  
R9 0.00000000  
R10 0.00000000  
R11 0.00000000  
R12 0.00000000  
R13 0.00000000  
R14 0.00000000  
R15 0.00000000  
R16 0.00000000  
R17 0.00000000  
R18 0.00000000  
R19 0.00000000  
R20 0.00000000  
R21 0.00000000  
R22 0.00000000  
R23 0.00000000  
R24 0.00000000  
R25 0.00000000  
R26 0.00000000  
R27 0.00000000  
R28 0.00000000  
R29 0.00000000  
R30 0.00000000  
R31 0.00000000  
R32 0.00000000  
R33 0.00000000  
R34 0.00000000  
R35 0.00000000  
R36 0.00000000  
R37 0.00000000  
R38 0.00000000  
R39 0.00000000  
R40 0.00000000  
R41 0.00000000  
R42 0.00000000  
R43 0.00000000  
R44 0.00000000  
R45 0.00000000  
R46 0.00000000  
R47 0.00000000  
R48 0.00000000  
R49 0.00000000  
R50 0.00000000  
R51 0.00000000  
R52 0.00000000  
R53 0.00000000  
R54 0.00000000  
R55 0.00000000  
R56 0.00000000  
R57 0.00000000  
R58 0.00000000  
R59 0.00000000  
R60 0.00000000  
R61 0.00000000  
R62 0.00000000  
R63 0.00000000  
R64 0.00000000  
R65 0.00000000  
R66 0.00000000  
R67 0.00000000  
R68 0.00000000  
R69 0.00000000  
R70 0.00000000  
R71 0.00000000  
R72 0.00000000  
R73 0.00000000  
R74 0.00000000  
R75 0.00000000  
R76 0.00000000  
R77 0.00000000  
R78 0.00000000  
R79 0.00000000  
R80 0.00000000  
R81 0.00000000  
R82 0.00000000  
R83 0.00000000  
R84 0.00000000  
R85 0.00000000  
R86 0.00000000  
R87 0.00000000  
R88 0.00000000  
R89 0.00000000  
R90 0.00000000  
R91 0.00000000  
R92 0.00000000  
R93 0.00000000  
R94 0.00000000  
R95 0.00000000  
R96 0.00000000  
R97 0.00000000  
R98 0.00000000  
R99 0.00000000  
R100 0.00000000  
R101 0.00000000  
R102 0.00000000  
R103 0.00000000  
R104 0.00000000  
R105 0.00000000  
R106 0.00000000  
R107 0.00000000  
R108 0.00000000  
R109 0.00000000  
R110 0.00000000  
R111 0.00000000  
R112 0.00000000  
R113 0.00000000  
R114 0.00000000  
R115 0.00000000  
R116 0.00000000  
R117 0.00000000  
R118 0.00000000  
R119 0.00000000  
R120 0.00000000  
R121 0.00000000  
R122 0.00000000  
R123 0.00000000  
R124 0.00000000  
R125 0.00000000  
R126 0.00000000  
R127 0.00000000  
R128 0.00000000  
R129 0.00000000  
R130 0.00000000  
R131 0.00000000  
R132 0.00000000  
R133 0.00000000  
R134 0.00000000  
R135 0.00000000  
R136 0.00000000  
R137 0.00000000  
R138 0.00000000  
R139 0.00000000  
R140 0.00000000  
R141 0.00000000  
R142 0.00000000  
R143 0.00000000  
R144 0.00000000  
R145 0.00000000  
R146 0.00000000  
R147 0.00000000  
R148 0.00000000  
R149 0.00000000  
R150 0.00000000  
R151 0.00000000  
R152 0.00000000  
R153 0.00000000  
R154 0.00000000  
R155 0.00000000  
R156 0.00000000  
R157 0.00000000  
R158 0.00000000  
R159 0.00000000  
R160 0.00000000  
R161 0.00000000  
R162 0.00000000  
R163 0.00000000  
R164 0.00000000  
R165 0.00000000  
R166 0.00000000  
R167 0.00000000  
R168 0.00000000  
R169 0.00000000  
R170 0.00000000  
R171 0.00000000  
R172 0.00000000  
R173 0.00000000  
R174 0.00000000  
R175 0.00000000  
R176 0.00000000  
R177 0.00000000  
R178 0.00000000  
R179 0.00000000  
R180 0.00000000  
R181 0.00000000  
R182 0.00000000  
R183 0.00000000  
R184 0.00000000  
R185 0.00000000  
R186 0.00000000  
R187 0.00000000  
R188 0.00000000  
R189 0.00000000  
R190 0.00000000  
R191 0.00000000  
R192 0.00000000  
R193 0.00000000  
R194 0.00000000  
R195 0.00000000  
R196 0.00000000  
R197 0.00000000  
R198 0.00000000  
R199 0.00000000  
R200 0.00000000  
R201 0.00000000  
R202 0.00000000  
R203 0.00000000  
R204 0.00000000  
R205 0.00000000  
R206 0.00000000  
R207 0.00000000  
R208 0.00000000  
R209 0.00000000  
R210 0.00000000  
R211 0.00000000  
R212 0.00000000  
R213 0.00000000  
R214 0.00000000  
R215 0.00000000  
R216 0.00000000  
R217 0.00000000  
R218 0.00000000  
R219 0.00000000  
R220 0.00000000  
R221 0.00000000  
R222 0.00000000  
R223 0.00000000  
R224 0.00000000  
R225 0.00000000  
R226 0.00000000  
R227 0.00000000  
R228 0.00000000  
R229 0.00000000  
R230 0.00000000  
R231 0.00000000  
R232 0.00000000  
R233 0.00000000  
R234 0.00000000  
R235 0.00000000  
R236 0.00000000  
R237 0.00000000  
R238 0.00000000  
R239 0.00000000  
R240 0.00000000  
R241 0.00000000

**APT NMR spectrum (100MHz, DMSO-d<sub>6</sub>) of compound 3i**

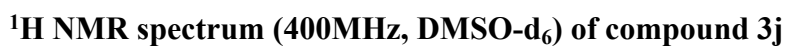

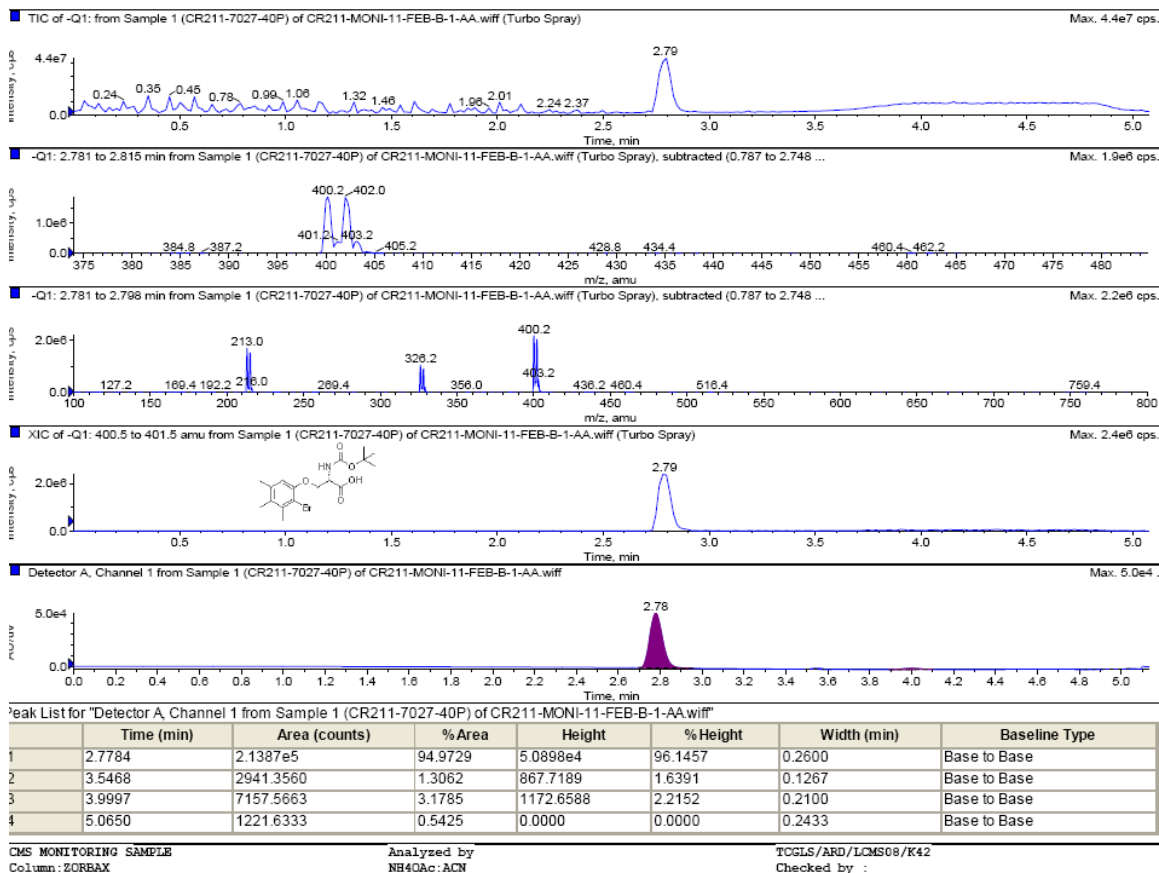

## LCMS spectrum of compound 3j

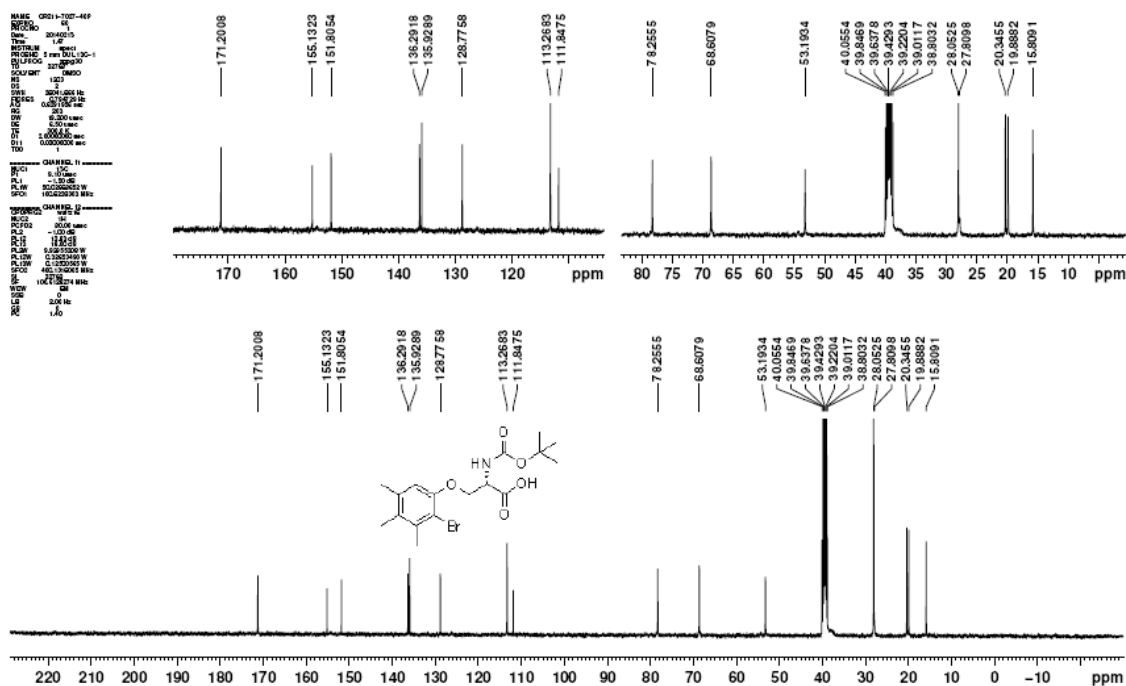



NAME CR211-7027-88  
EXPNO 1  
PROCNO 1  
Date\_ 20140311  
Time 14.53  
INSTRUM spect  
PROBHD 5 mm PABBO BB-  
PULPROG zgpg30  
TD 65536  
SOLVENT DMSO  
NS 0  
DS 0  
SWH 4012.320 MHz  
FIDRES 0.244521 Hz  
AQ 2.0447731 sec  
RG 0.05  
SQ 0.05  
DE 6.50 umC  
DM 0.00  
TE 300.2 K  
TD 65536  
F2 1.0000000 sec  
TD0 1

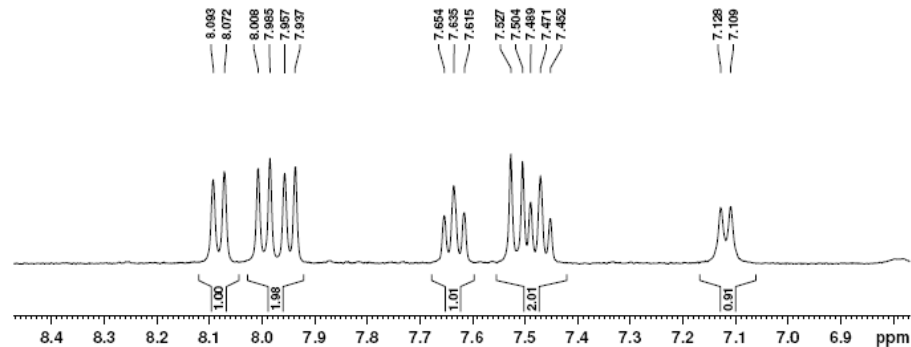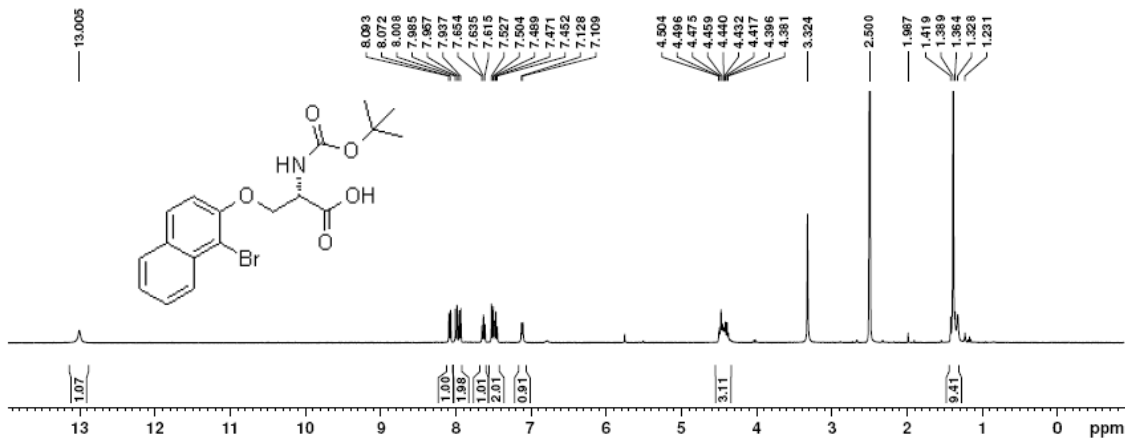

<sup>1</sup>H NMR spectrum (400MHz, DMSO-d<sub>6</sub>) of compound 3k

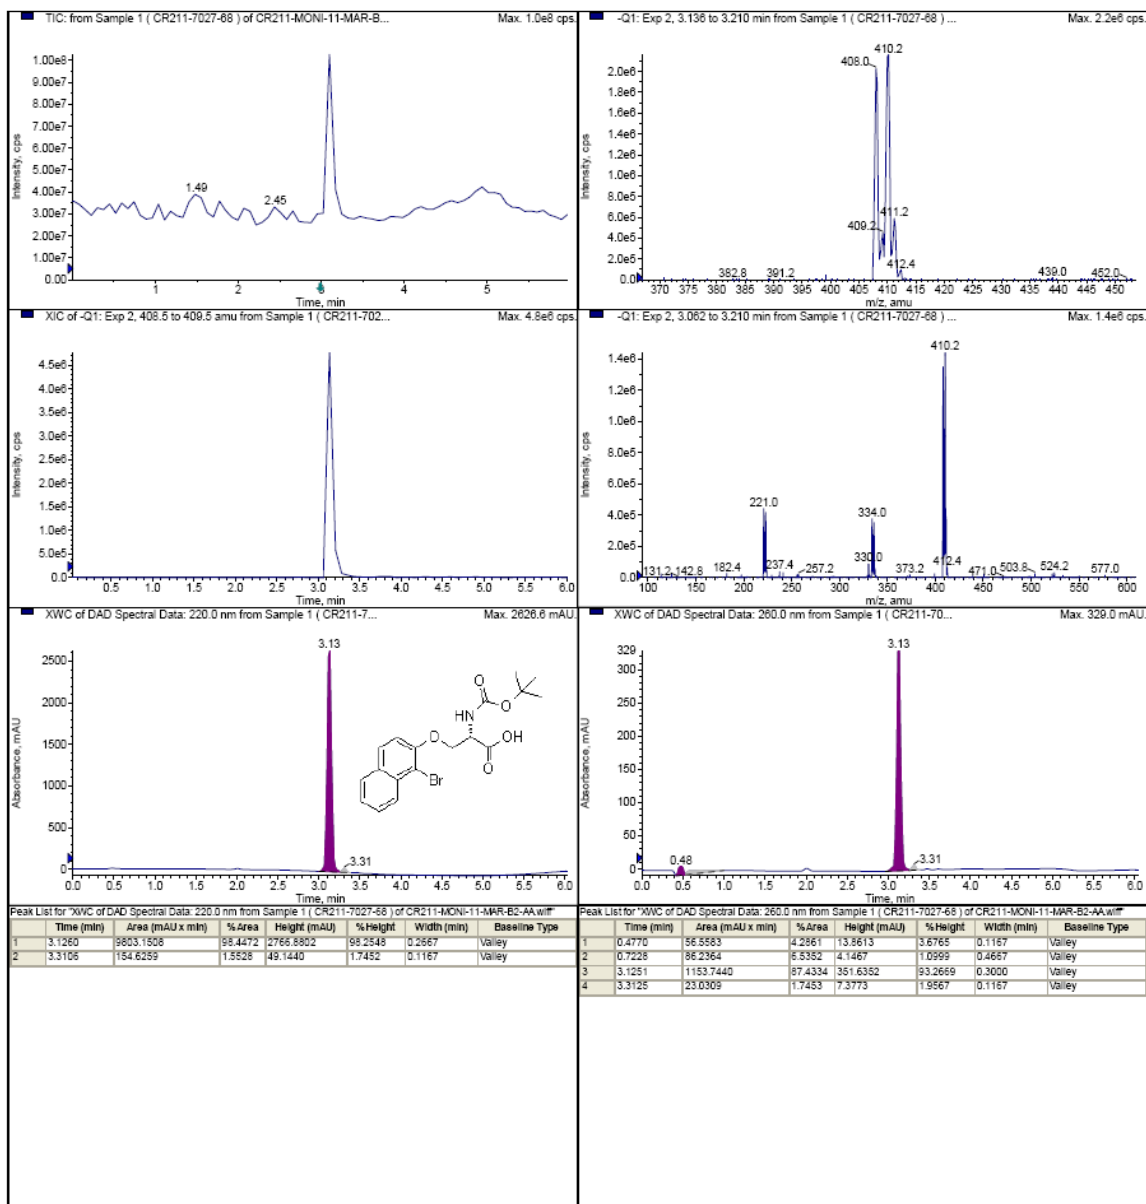

Channel 1 at wavelength 220 nm,  
Channel 2 at wavelength 260 nm

Column : SORBAX C18

Analysed by

## LCMS spectrum of compound 3k

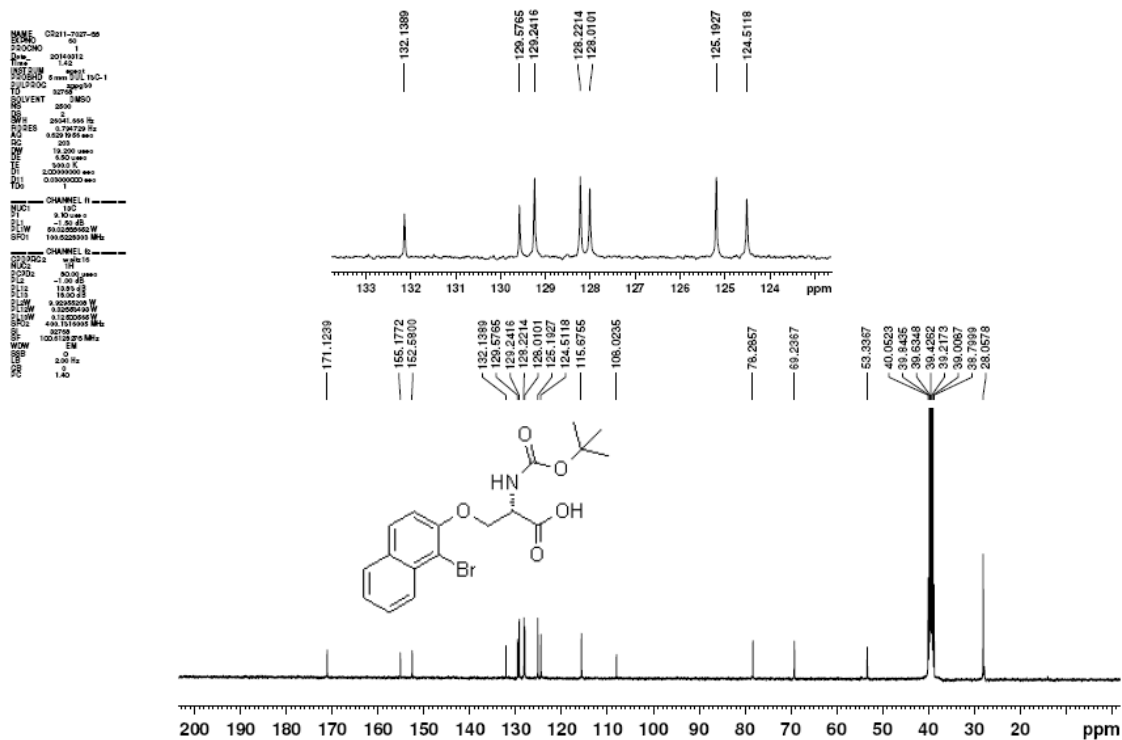

**13C NMR spectrum (100MHz, DMSO-d<sub>6</sub>) of compound 3k**

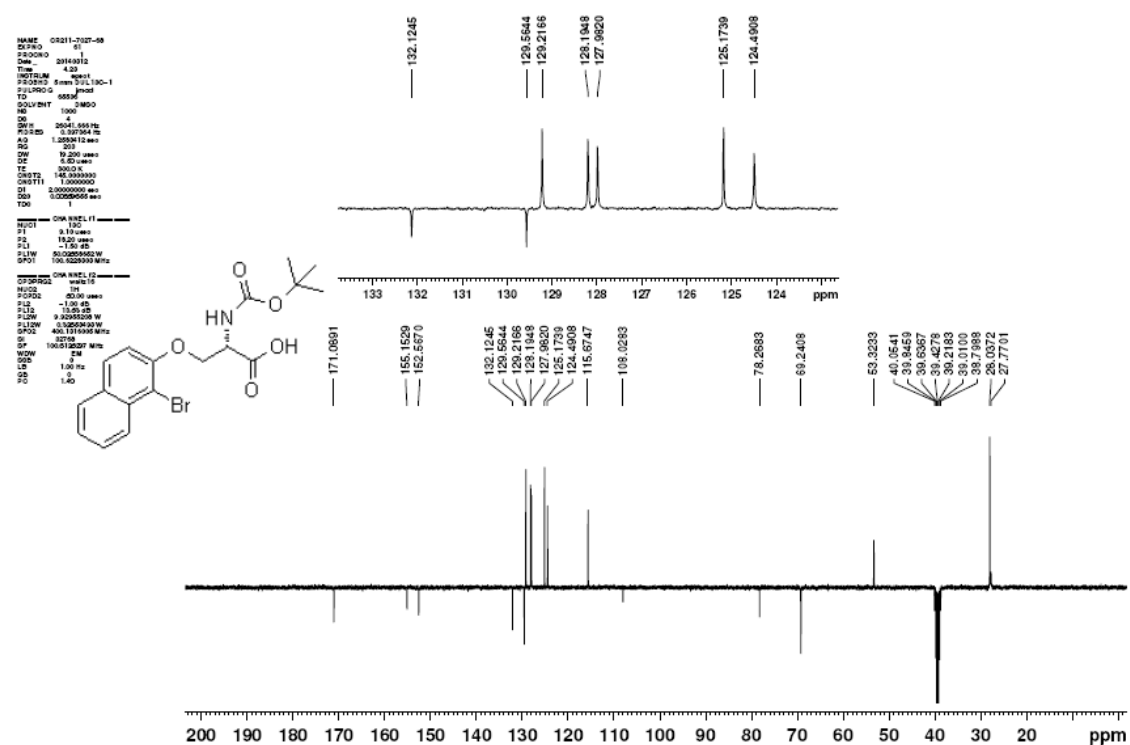

**APT NMR spectrum (100MHz, DMSO-d<sub>6</sub>) of compound 3k**



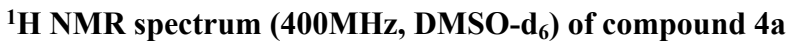

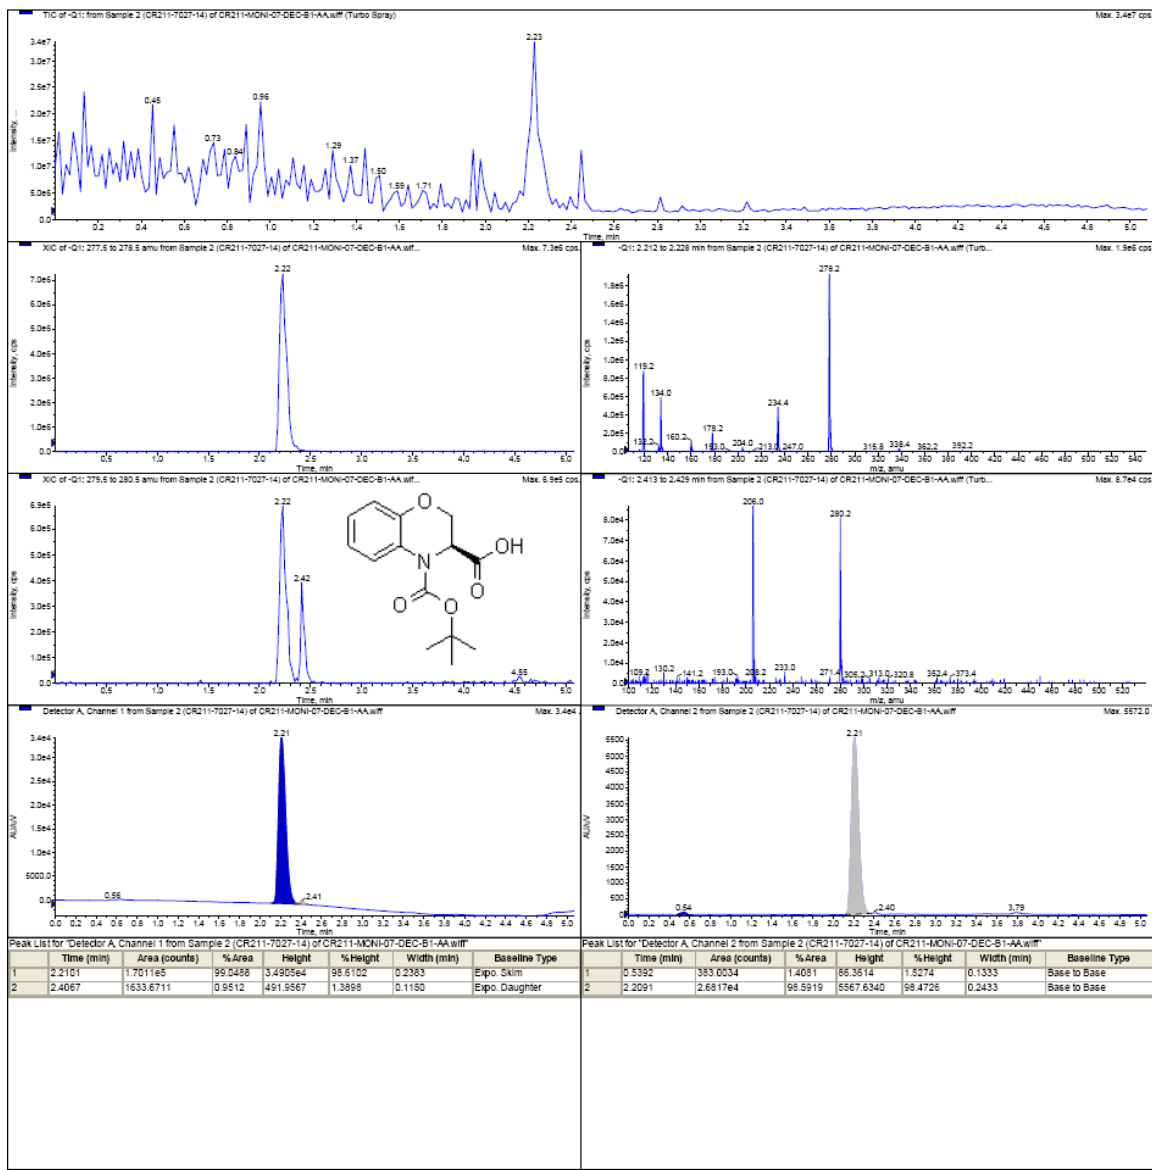

Channel 1 at wavelength 220 nm.  
Channel 2 at wavelength 260 nm

Column: SORBAX EXTEND C18 (50x4.6mm), 5µ

Analysed by

## LCMS spectrum of compound 4a

Analysis Method : C:\CHEM32\1\DATA\2014\JAN-14\140114D 2014-01-14 12-47-->  
 Last Changed : Tue, 24. Dec. 2013, 00:26:54 pm

Acq. Method : C:\CHEM32\1\DATA\2014\JAN-14\160114A 2014-01-16 09-36-  
 29\TCGLSKL.M

Ref: MVP/16.01.14/840

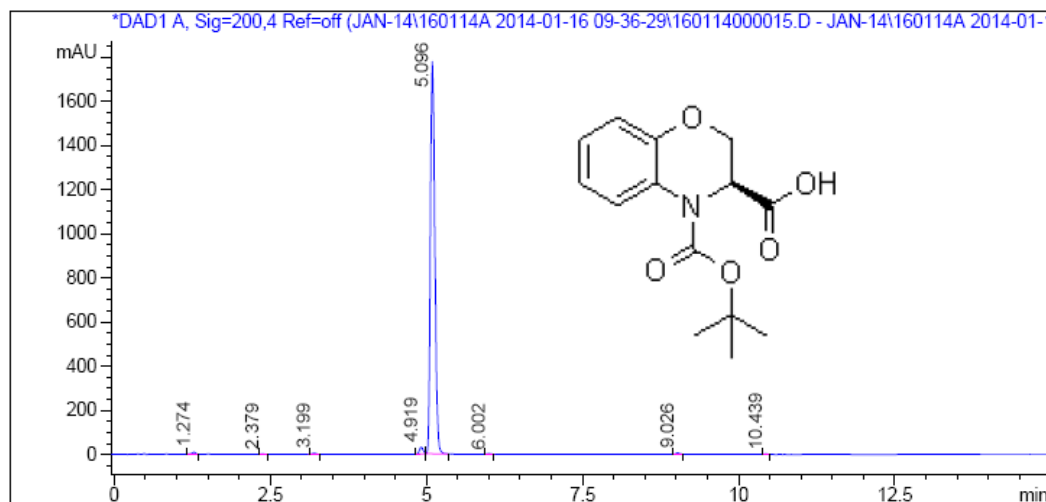

| Signal 1:DAD1 A, Sig=200,4 Ref=off |          |         |        |
|------------------------------------|----------|---------|--------|
| Peak #                             | RT [min] | Area    | Area % |
| 1                                  | 1.27     | 43.92   | 0.48   |
| 2                                  | 2.38     | 8.95    | 0.10   |
| 3                                  | 3.20     | 25.19   | 0.28   |
| 4                                  | 4.92     | 126.88  | 1.40   |
| 5                                  | 5.10     | 8834.74 | 97.17  |
| 6                                  | 6.00     | 14.52   | 0.16   |
| 7                                  | 9.03     | 28.36   | 0.31   |
| 8                                  | 10.44    | 9.83    | 0.11   |

**HPLC purity of compound 4a**

Acq Operator : KONDABABU  
 Injection Date : 12/30/2014 4:45:45 PM  
 Acq. Method : C:\Chem32\1\DATA\DEC-2014\301214 2014-12-30 09-49-44->  
 Analysis Method : C:\CHEM32\1\METHODS\A-1.M  
 Last Changed : Tue, 30. Dec. 2014, 04:46:47 pm  
 (modified after loading)  
 Samole ID CR211-7027-84 (D+L)

Location : Vial 77

Inj. No. : 1

Inj. Vol. : 2 µl

Column Name : Chiralpak IA(250x4.6mm)5µ

ARD/K/7804

Mobile Phase:Hexane/EtOH/TFA:90/10/0.1

Flow Rate:1.0 ml/min

Solubility:MEOH

->

Ref :KD/30.12.14/1578

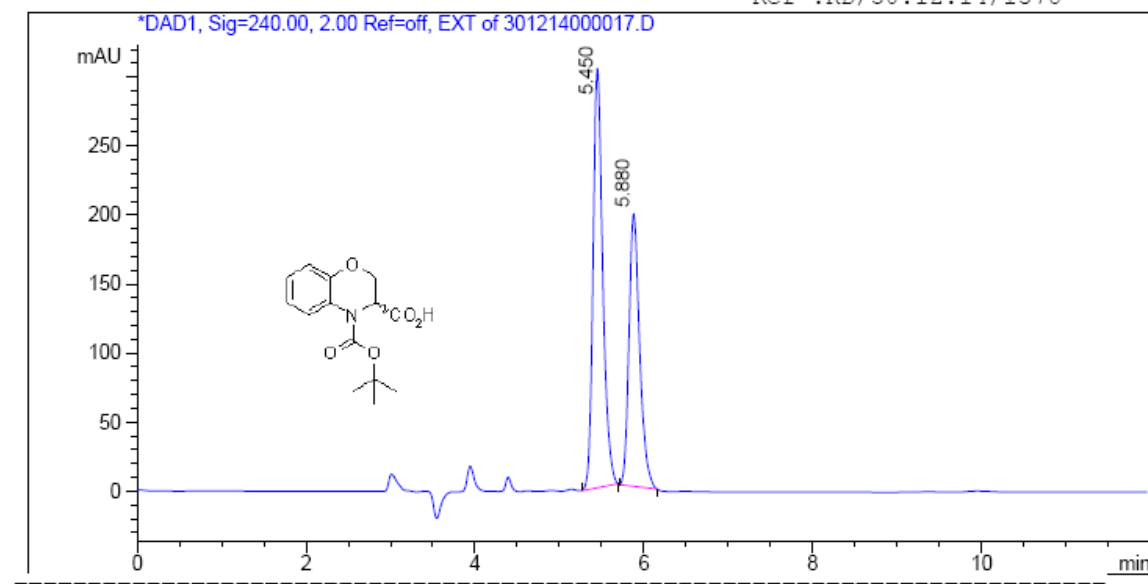

Signal 1: DAD1, Sig=240.00, 2.00 Ref=off, EXT

| Peak # | RT [min] | Area    | Area % |
|--------|----------|---------|--------|
| 1      | 5.45     | 2421.20 | 58.26  |
| 2      | 5.88     | 1734.52 | 41.74  |

**Chiral HPLC of a mixture of D- and L-isomer of compound 4a prepared by external mixing (not racemic mixture)**

Acq Operator : KONDABABU  
 Injection Date : 12/30/2014 4:59:44 PM  
 Acq. Method : C:\Chem32\1\DATA\DEC-2014\301214 2014-12-30 09-49-44->  
 Analysis Method : C:\CHEM32\1\METHODS\A-1.M  
 Last Changed : Tue, 30. Dec. 2014, 04:46:47 pm  
 (modified after loading)  
 Samole ID CR211-7027-84L

Column Name : Chiralpak IA(250x4.6mm)5μ  
 ARD/K/7804  
 Mobile Phase:Hexane/EtOH/TFA:90/10/0.1  
 Flow Rate:1.0 ml/min  
 Solubility:MEOH

Ref :KD/30.12.14/1579 ->

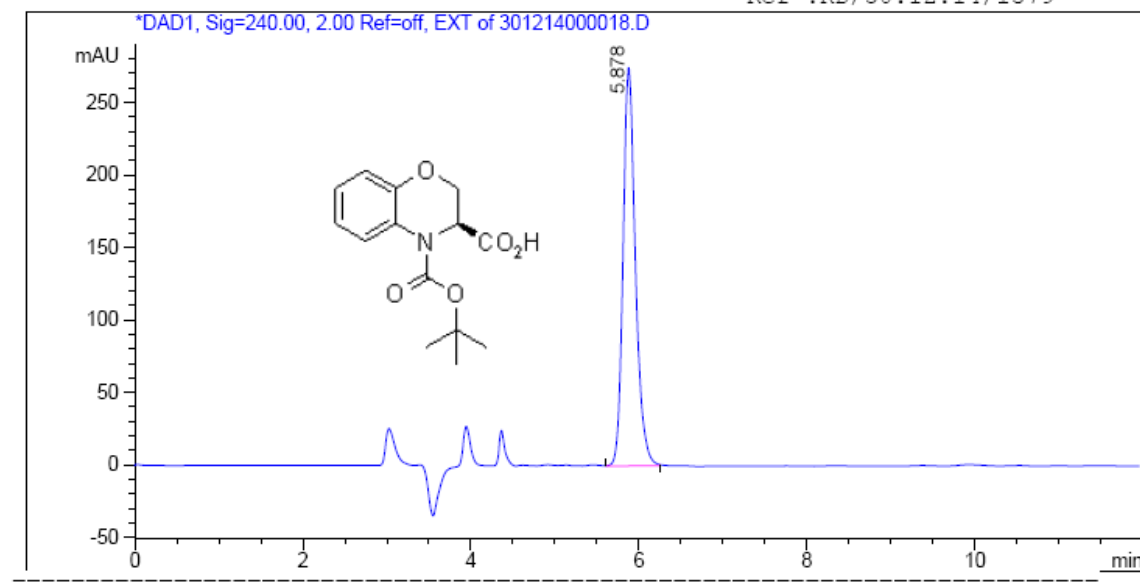

Signal 1: DAD1, Sig=240.00, 2.00 Ref=off, EXT

| Peak # | RT [min] | Area    | Area % |
|--------|----------|---------|--------|
| 1      | 5.88     | 2817.12 | 100.00 |

**Chiral HPLC of L-isomer of compound 4a**

Acq Operator : KONDABABU  
 Injection Date : 12/30/2014 4:31:43 PM  
 Acq. Method : C:\Chem32\1\DATA\DEC-2014\301214 2014-12-30 09-49-44->  
 Analysis Method : C:\CHEM32\1\METHODS\A-1.M  
 Last Changed : Tue, 30. Dec. 2014, 04:46:47 pm  
 (modified after loading)  
 Samole ID CR211-7027-84D

Location : Vial 79  
 Inj. No. : 1  
 Inj. Vol. : 2 µl

Column Name : Chiralpak IA(250x4.6mm)5µ  
 ARD/K/7804  
 Mobile Phase:Hexane/EtOH/TFA:90/10/0.1  
 Flow Rate:1.0 ml/min  
 Solubility:MEOH

Ref :KD/30.12.14/1580

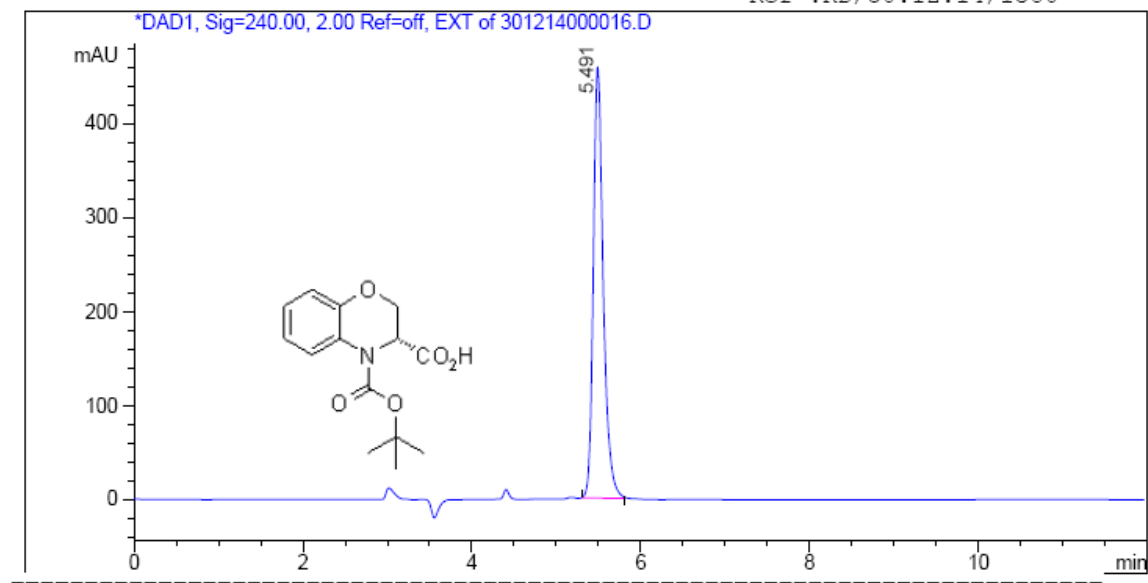

Signal 1: DAD1, Sig=240.00, 2.00 Ref=off, EXT

| Peak # | RT [min] | Area    | Area % |
|--------|----------|---------|--------|
| 1      | 5.49     | 3759.34 | 100.00 |

**Chiral HPLC of D-isomer of compound 4a**

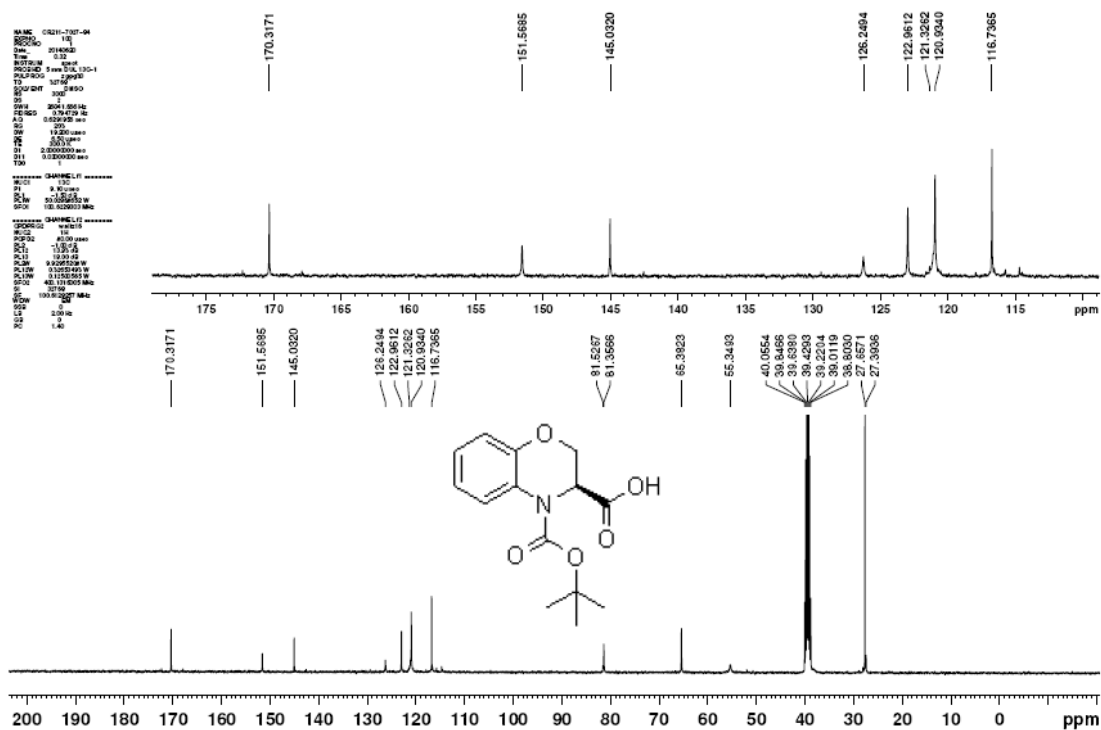

<sup>13</sup>C NMR spectrum (100MHz, DMSO-d<sub>6</sub>) of compound 4a

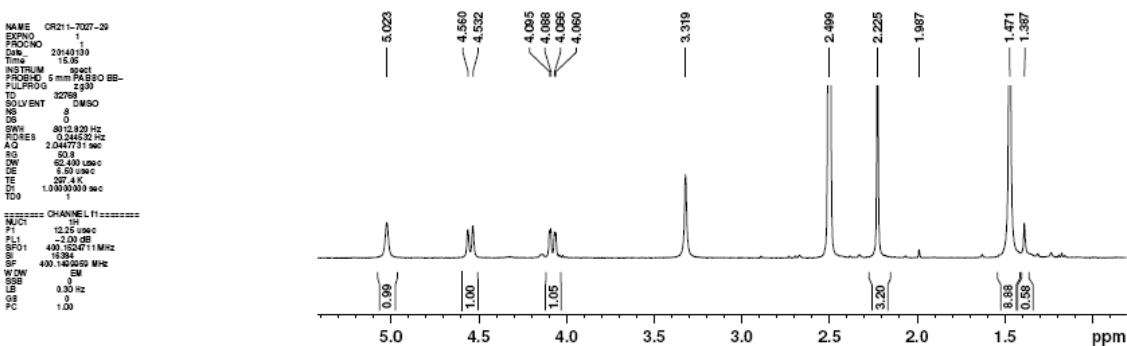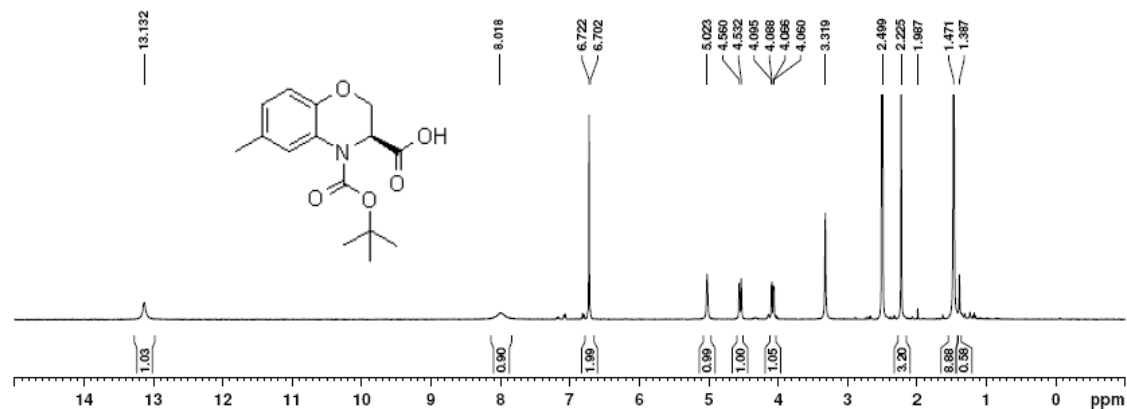

<sup>1</sup>H NMR spectrum (400MHz, DMSO-d<sub>6</sub>) of compound 4b





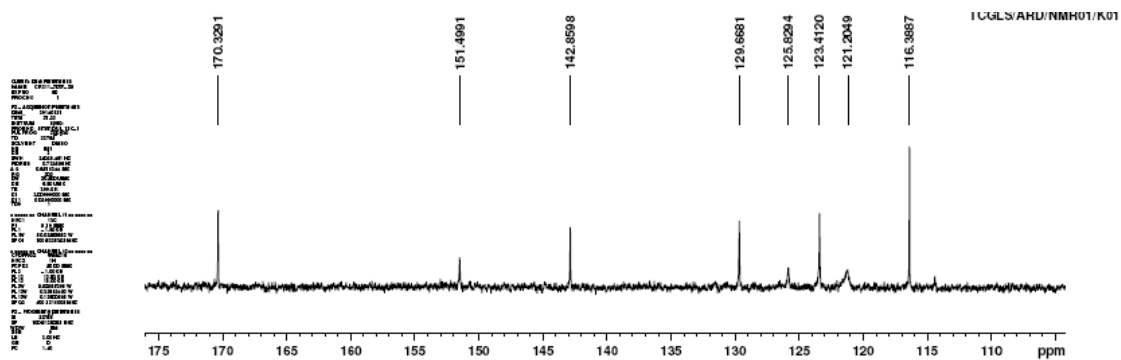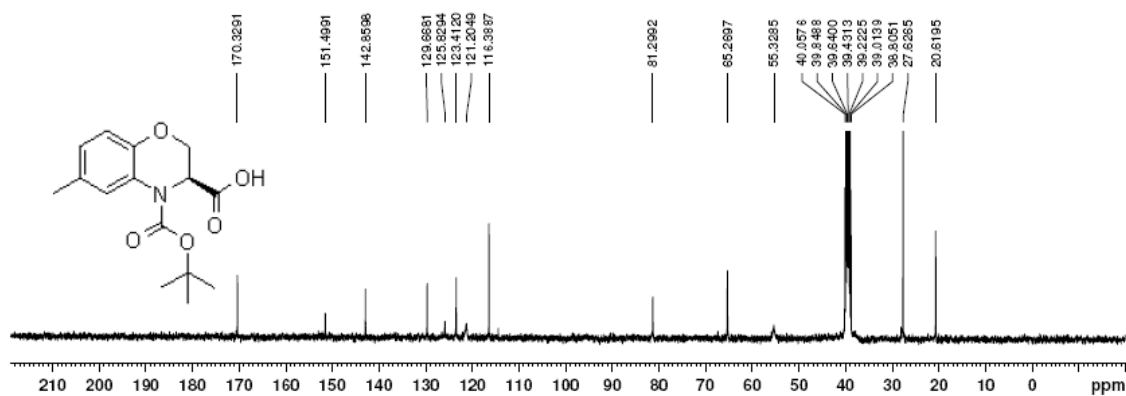

**<sup>13</sup>C NMR spectrum (100MHz, DMSO-d<sub>6</sub>) of compound 4b**

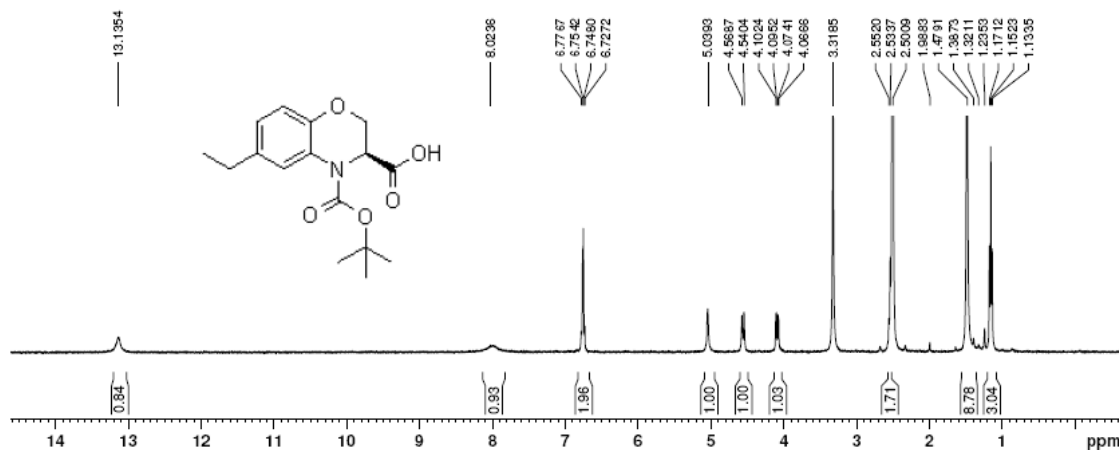

**<sup>1</sup>H NMR spectrum (400MHz, DMSO-d<sub>6</sub>) of compound 4c**

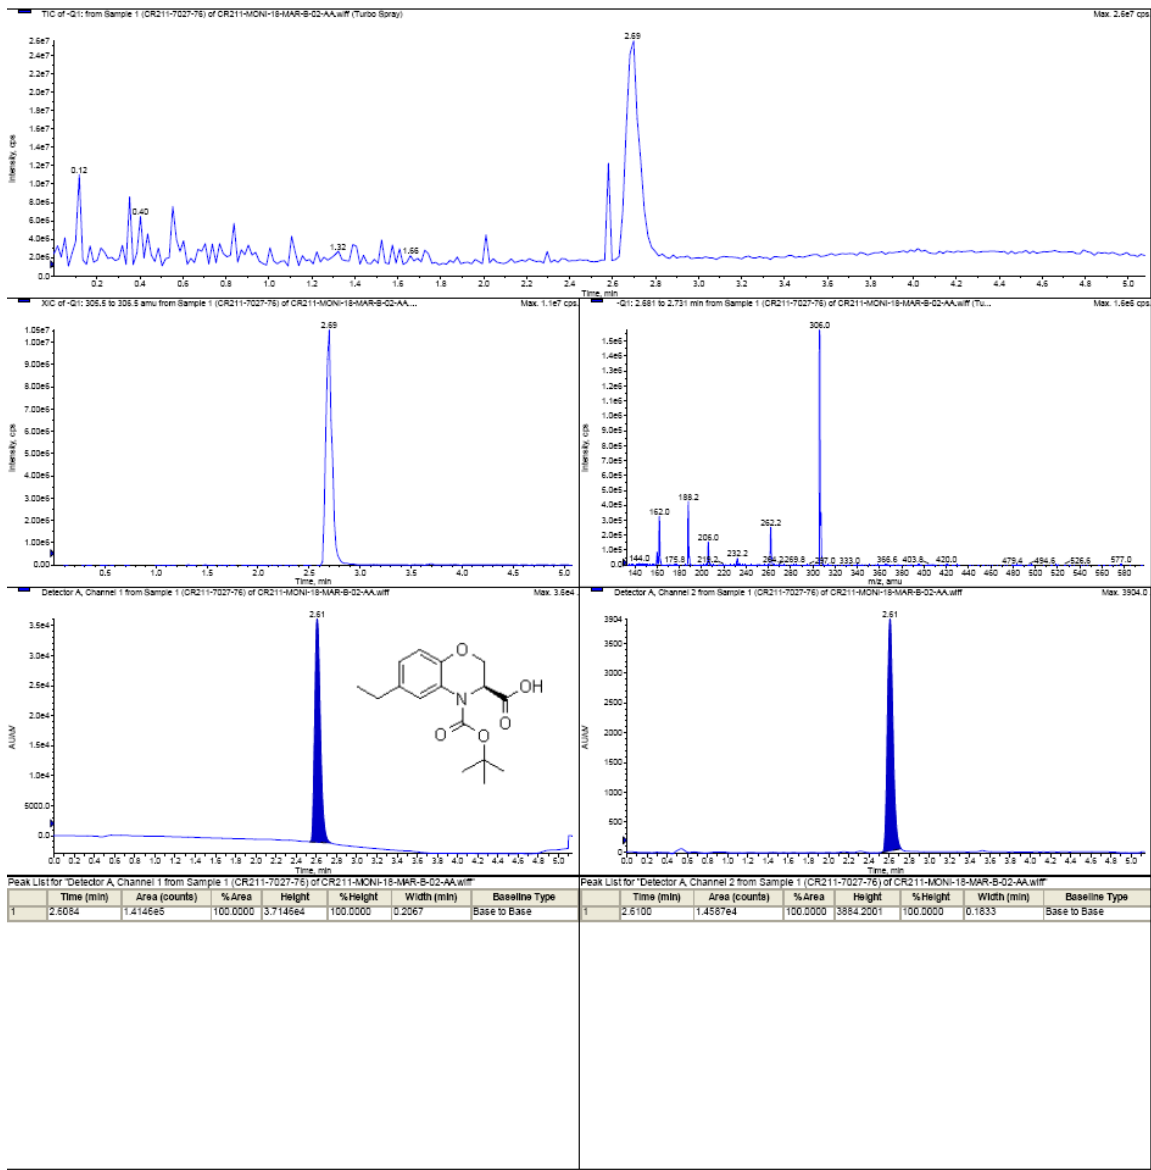

Channel 1 at wavelength 220 nm.  
Channel 2 at wavelength 260 nm

Column: SORBAC EXTEND C18 (50x4.6mm), 5µ

Analysed by

## LCMS spectrum of compound 4c

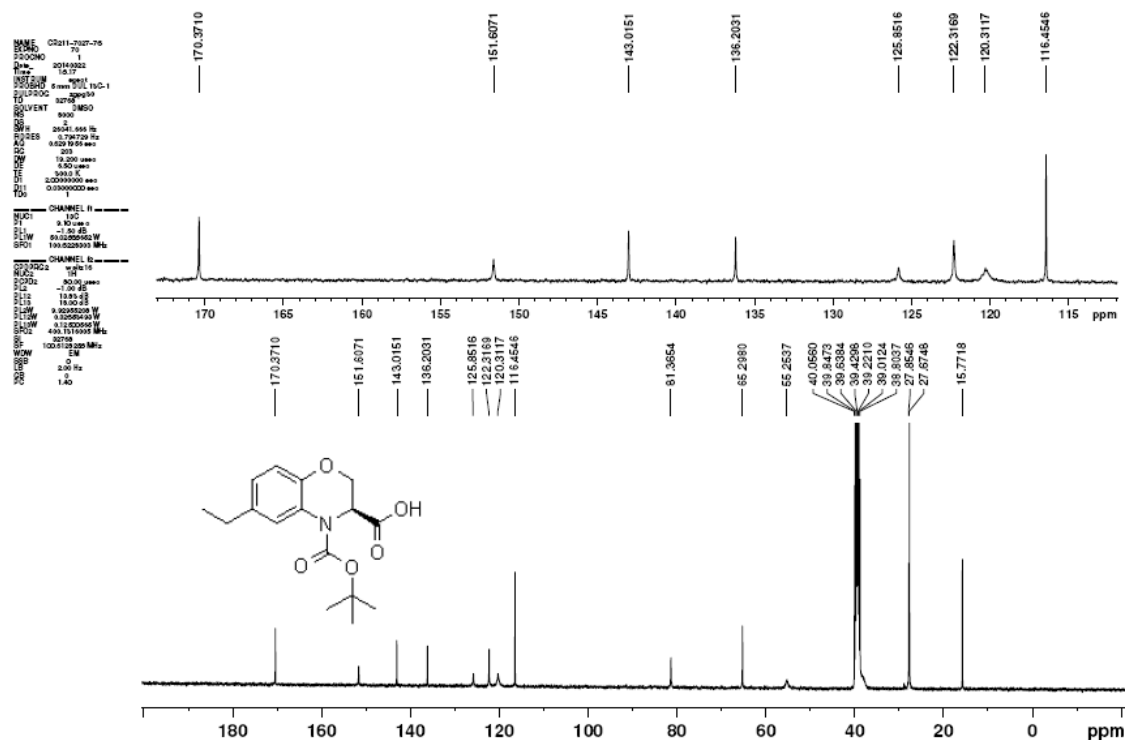

**<sup>13</sup>C NMR spectrum (100MHz, DMSO-d<sub>6</sub>) of compound 4c**

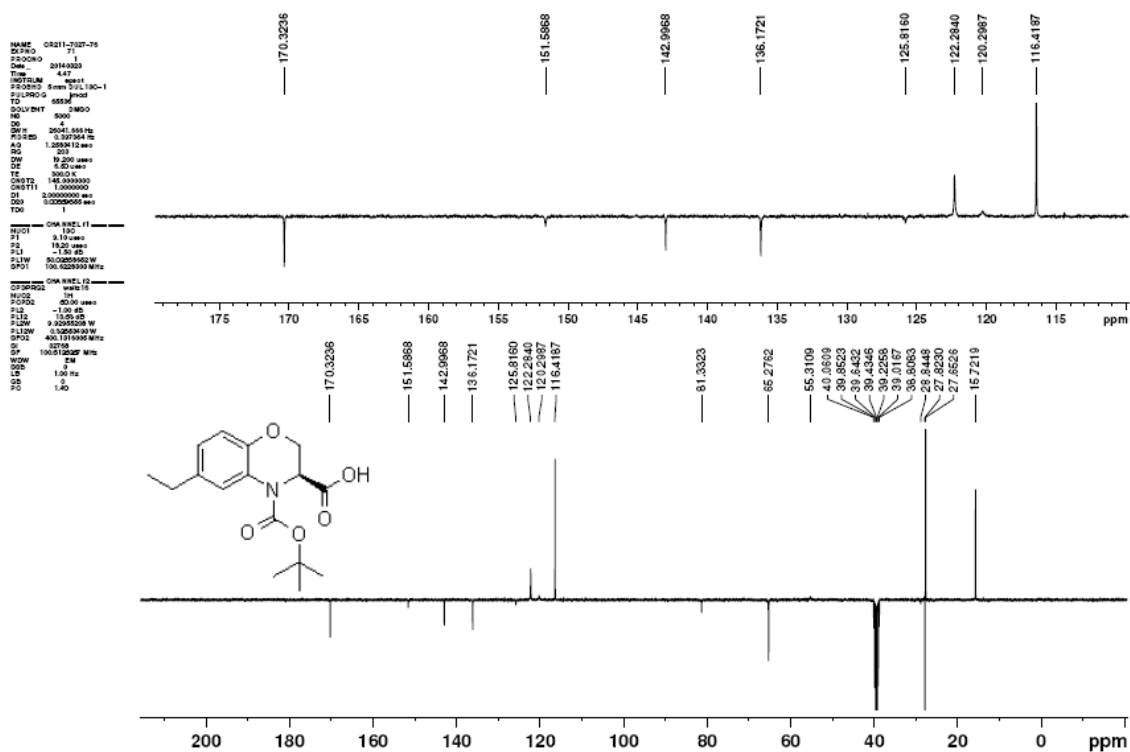

**APT NMR spectrum (100MHz, DMSO-d<sub>6</sub>) of compound 4c**

Acq Operator : KONDABABU  
 Injection Date : 12/31/2014 2:49:30 PM  
 Acq. Method : C:\Chem32\1\DATA\DEC-2014\311214 2014-12-31 10-01-35->  
 Analysis Method : C:\CHEM32\1\METHODS\B2.M  
 Last Changed : Wed, 31. Dec. 2014, 11:42:13 am  
 (modified after loading)  
 Sample ID:CR211-8259-96 (D+L)

Column Name:Chiralpak IA(250x4.6mm)5μ  
 ARD/K/7804  
 Mobile Phaes:Hexane/EtOH/TFA:90/10/0.1  
 Flow Rate:1.0 ml/min  
 Solubility:MeOH

Location : Vial 16  
 Inj. No. : 1  
 Inj. Vol. : 2 μl  
 Ref :KD/31.12.14/1663

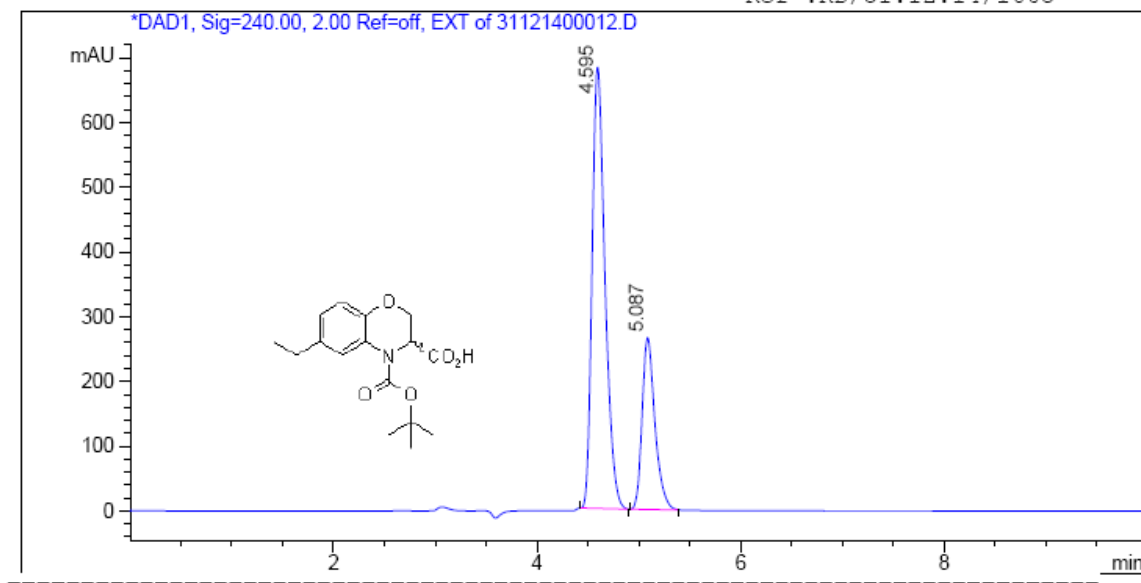

Signal 1: DAD1, Sig=240.00, 2.00 Ref=off, EXT

| Peak # | RT [min] | Area    | Area % |
|--------|----------|---------|--------|
| 1      | 4.60     | 5991.55 | 72.08  |
| 2      | 5.09     | 2320.53 | 27.92  |

**Chiral HPLC of a mixture of D- and L-isomer of compound 4a prepared by external mixing (not racemic mixture)**

Acq Operator : KONDABABU  
 Injection Date : 12/31/2014 2:27:12 PM  
 Acq. Method : C:\Chem32\1\DATA\DEC-2014\311214 2014-12-31 10-01-35->  
 Analysis Method : C:\CHEM32\1\METHODS\B2.M  
 Last Changed : Wed, 31. Dec. 2014, 11:42:13 am  
 (modified after loading)  
 Sample ID:CR211-8259-96L

Column Name:Chiralpak IA(250x4.6mm)5µ  
 ARD/K/7804  
 Mobile Phase:Hexane/EtOH/TFA:90/10/0.1  
 Flow Rate:1.0 ml/min  
 Solubility:MeOH

Ref :KD/31.12.14/1664

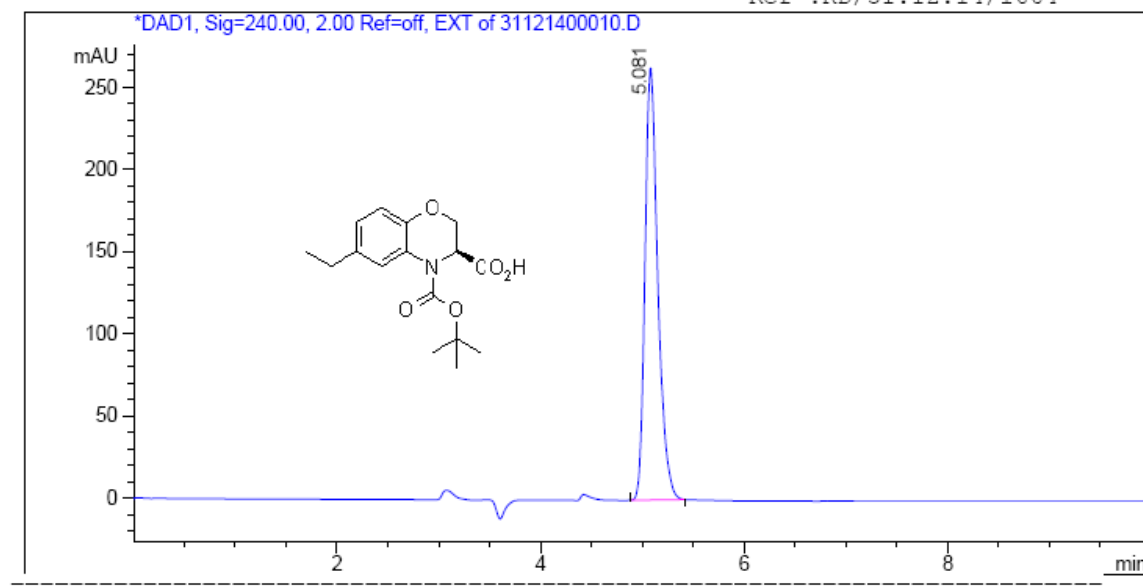

Signal 1: DAD1, Sig=240.00, 2.00 Ref=off, EXT

| Peak # | RT [min] | Area    | Area % |
|--------|----------|---------|--------|
| 1      | 5.08     | 2311.14 | 100.00 |

**Chiral HPLC of L-isomer of compound 4c**

Acq Operator : KONDABABU  
 Injection Date : 12/31/2014 2:38:21 PM  
 Acq. Method : C:\Chem32\1\DATA\DEC-2014\311214 2014-12-31 10-01-35->  
 Analysis Method : C:\CHEM32\1\METHODS\B2.M  
 Last Changed : Wed, 31. Dec. 2014, 11:42:13 am  
 (modified after loading)  
 Sample ID:CR211-8259-96D

Location : Vial 18  
 Inj. No. : 1  
 Inj. Vol. : 2 µl

Column Name:Chiralpak IA(250x4.6mm)5µ  
 ARD/K/7804  
 Mobile Phaes:Hexane/EtOH/TFA:90/10/0.1  
 Flow Rate:1.0 ml/min  
 Solubility:MeOH

Ref :KD/31.12.14/1665

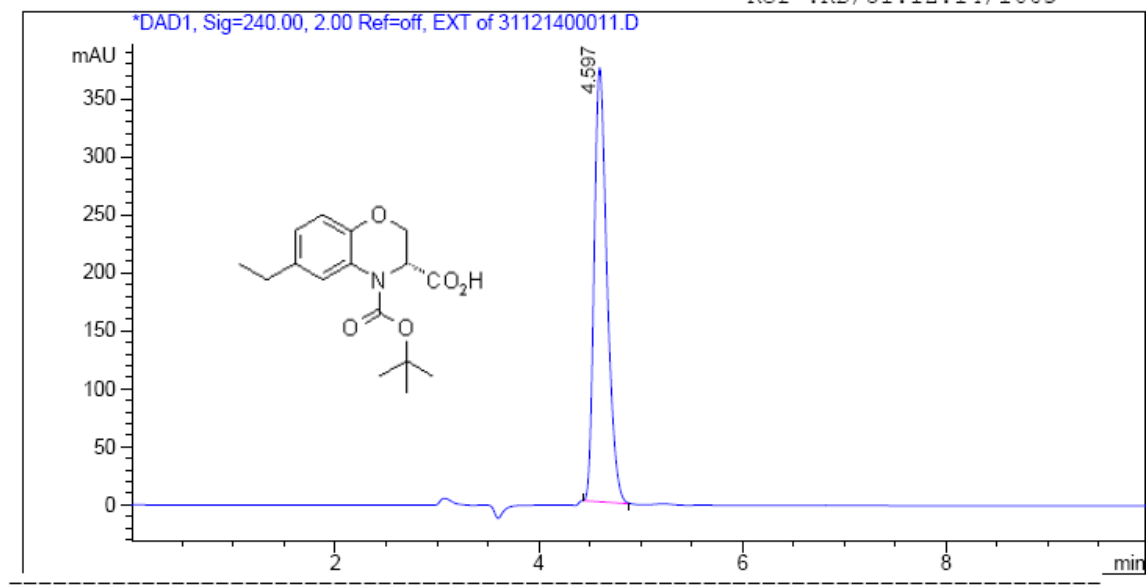

Signal 1: DAD1, Sig=240.00, 2.00 Ref=off, EXT

| Peak # | RT [min] | Area    | Area % |
|--------|----------|---------|--------|
| 1      | 4.60     | 3280.72 | 100.00 |

### Chiral HPLC of D-isomer of compound 4c

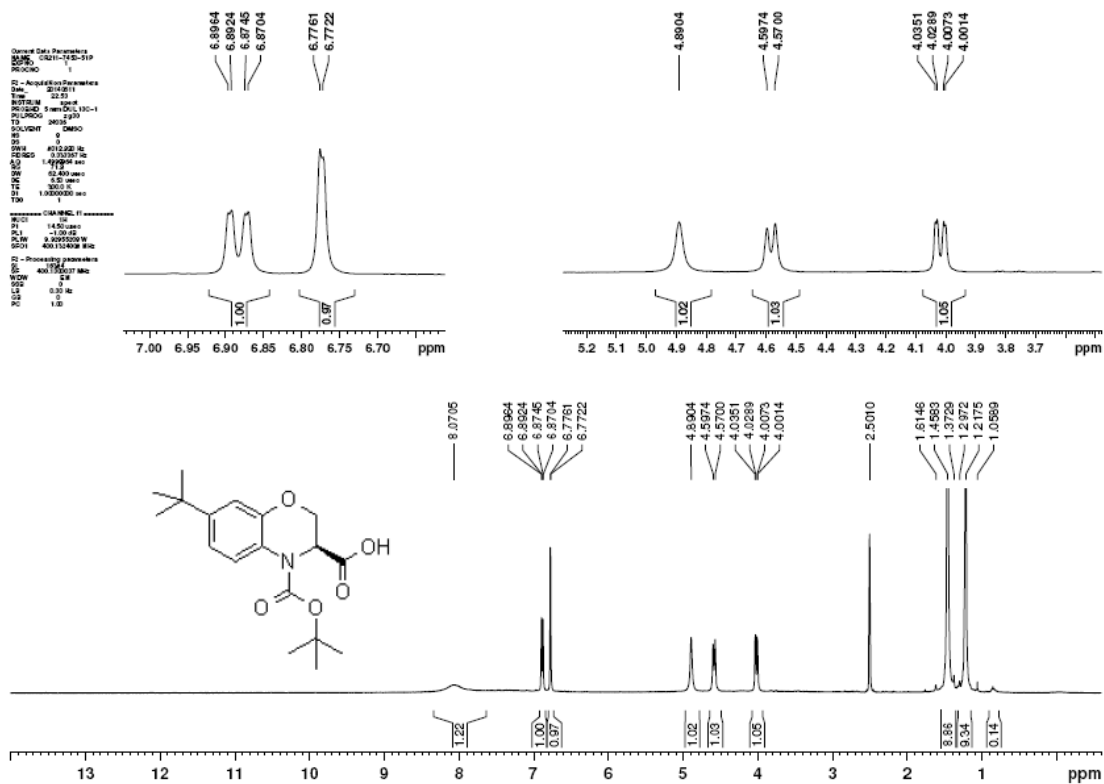

<sup>1</sup>H NMR spectrum (400MHz, DMSO-d<sub>6</sub>) of compound 4d



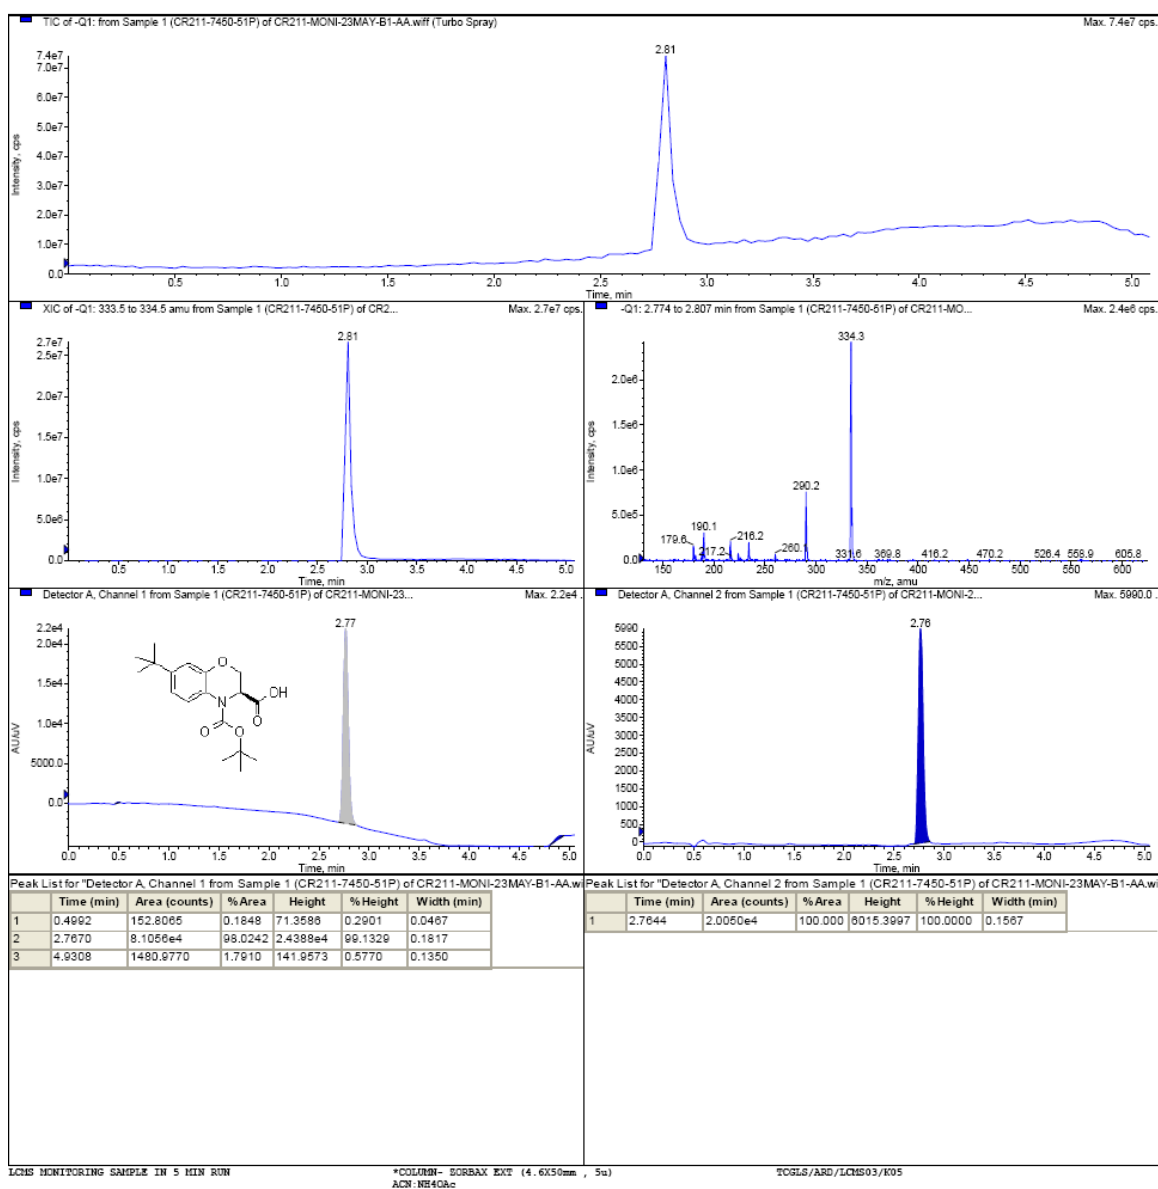

Channel 1 at wavelength 220 nm  
Channel 2 at wavelength 260 nm

Analysed By

Checked By

## LCMS spectrum of compound 4d

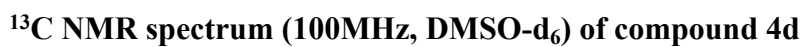

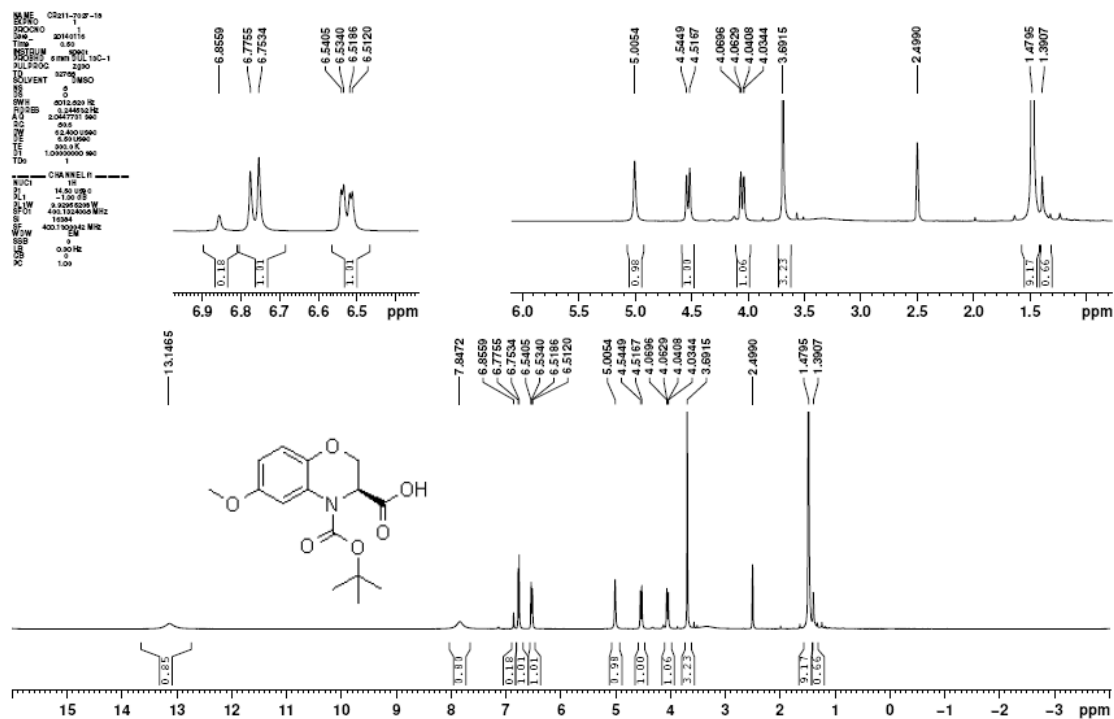

**<sup>1</sup>H NMR spectrum (400MHz, DMSO-d<sub>6</sub>) of compound 4e**

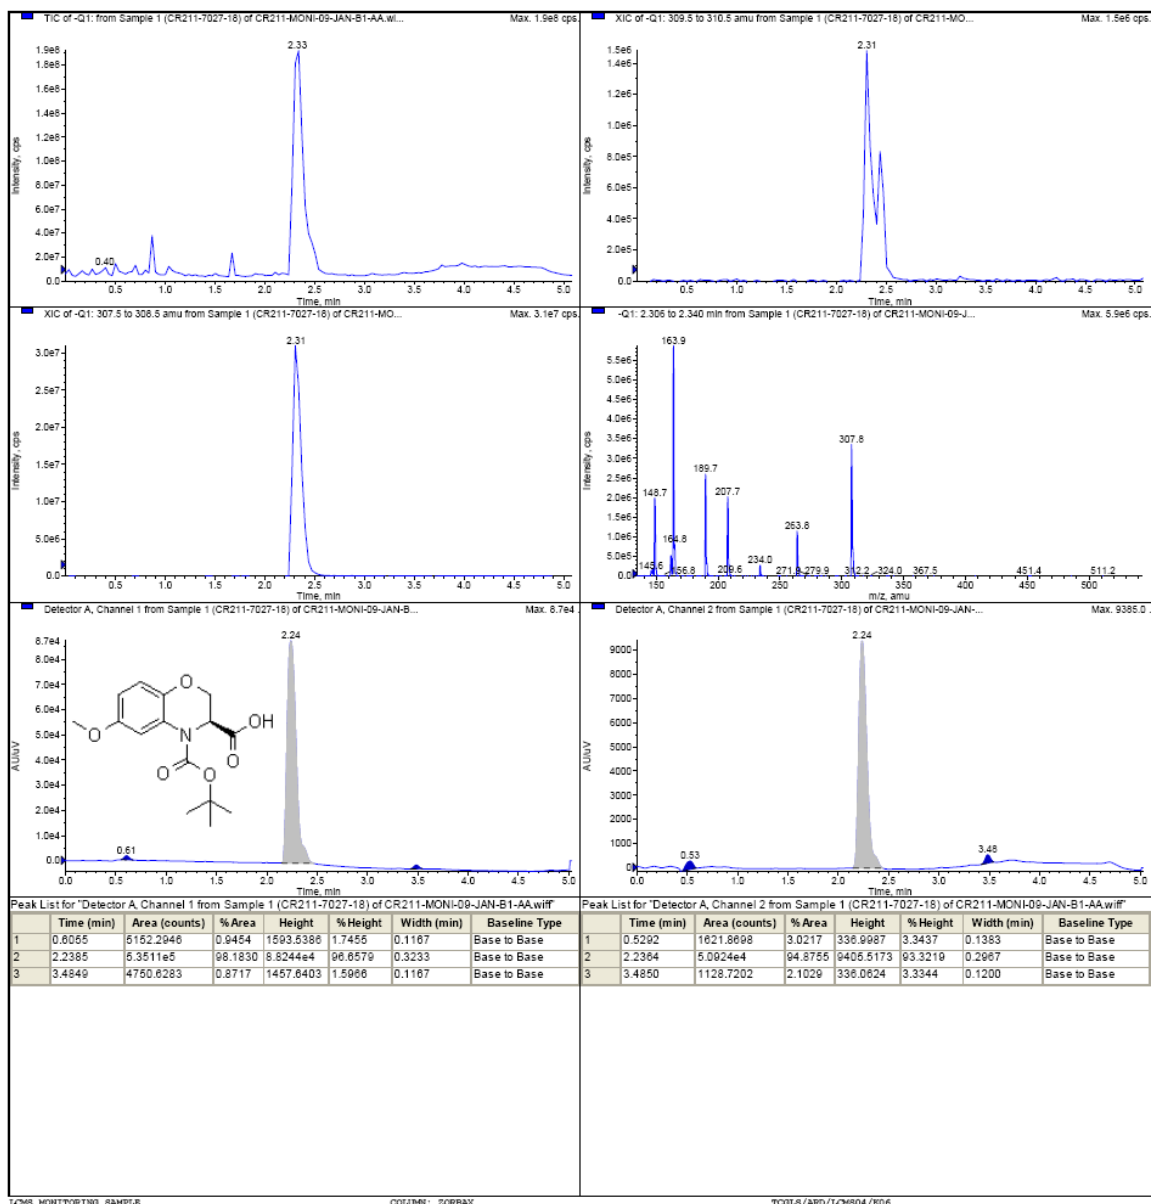

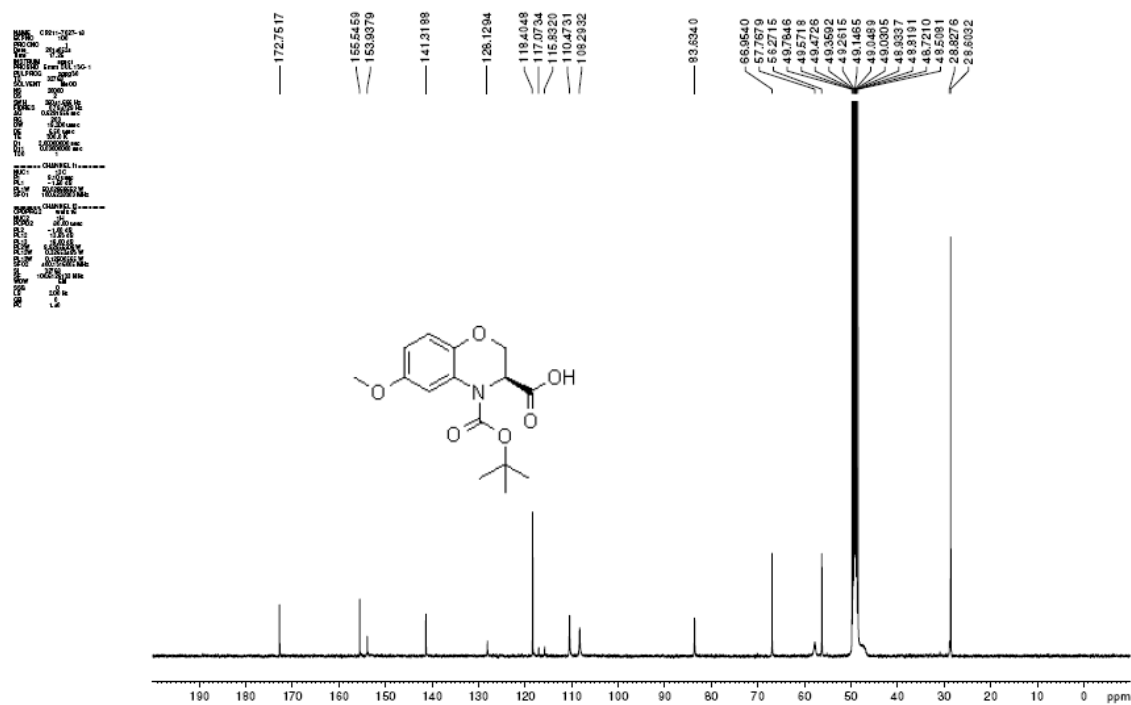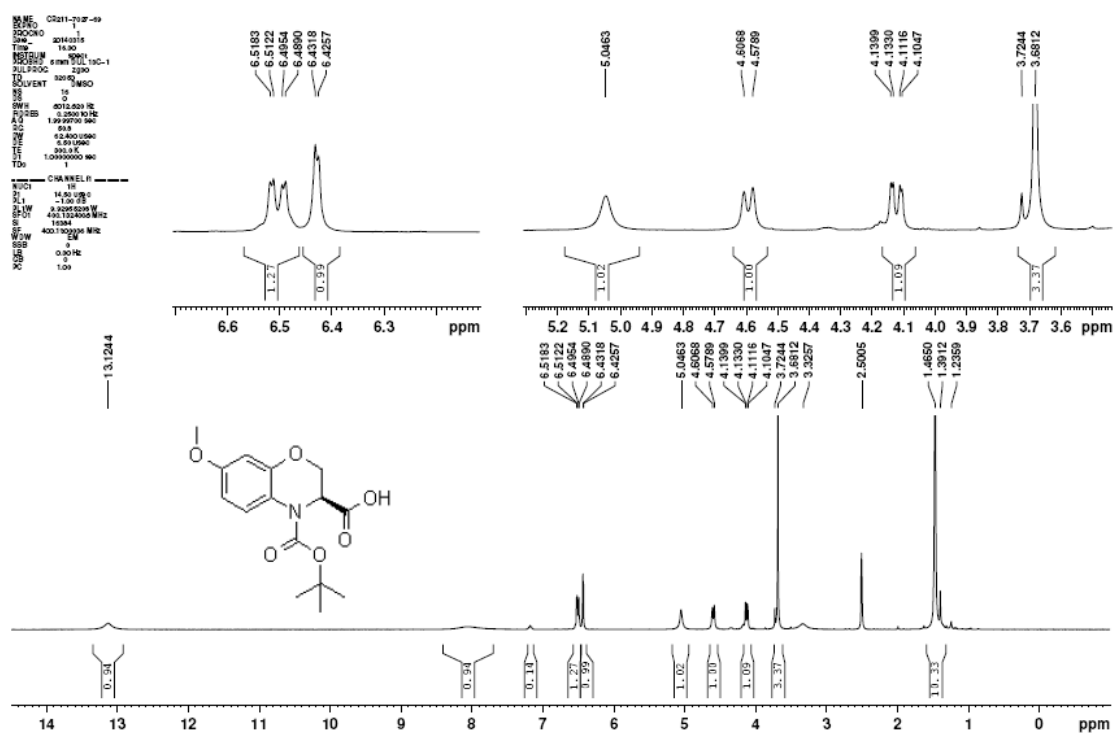

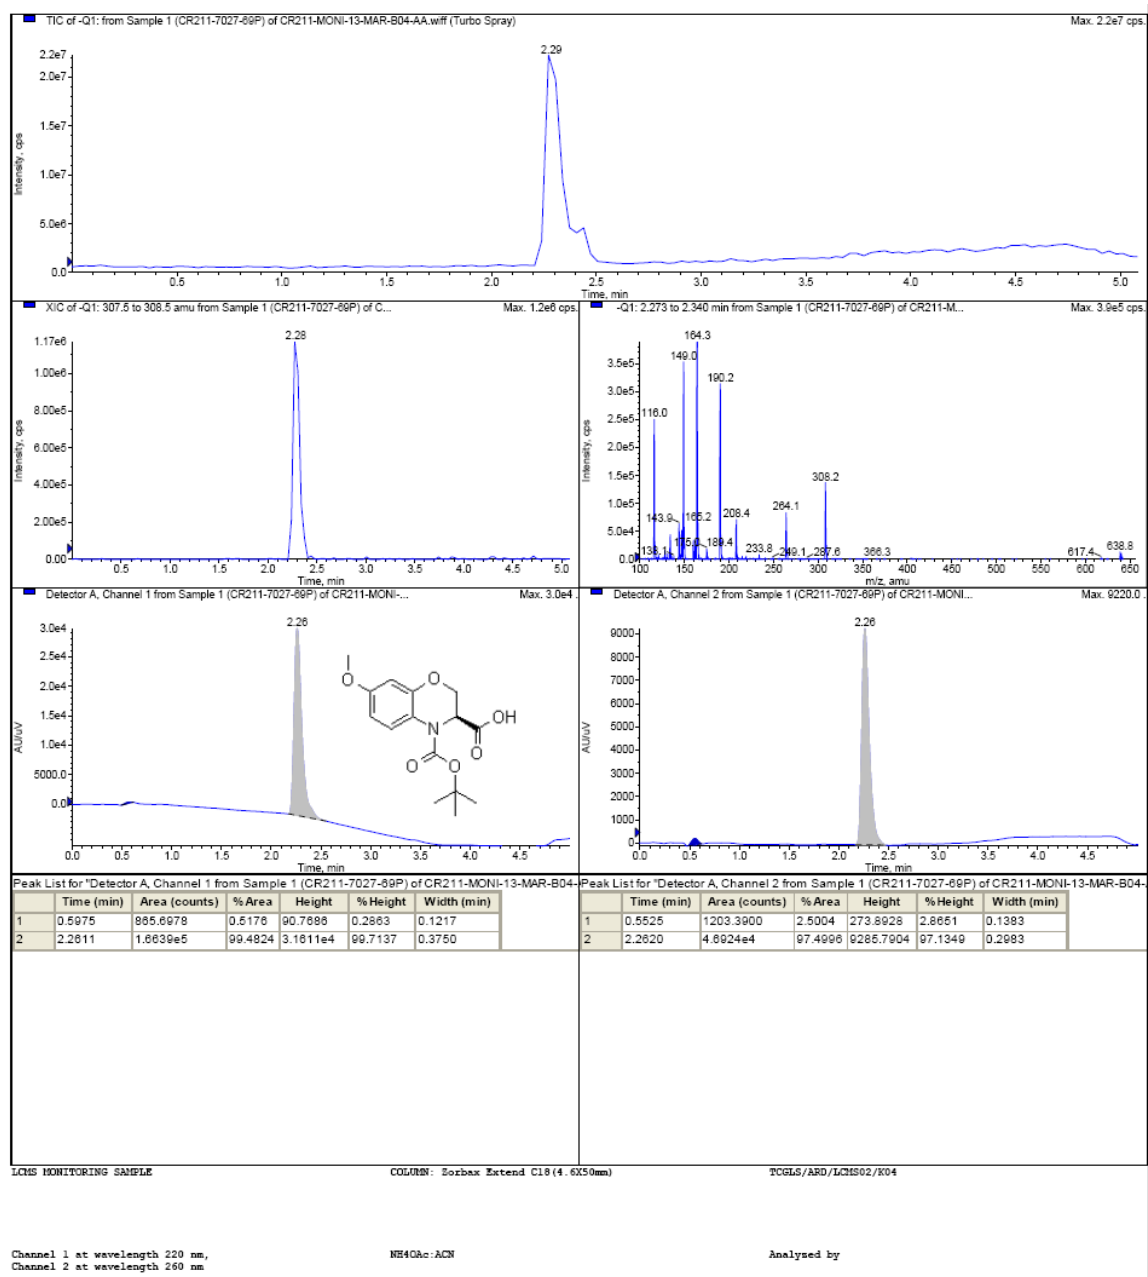

## LCMS spectrum of compound 4f

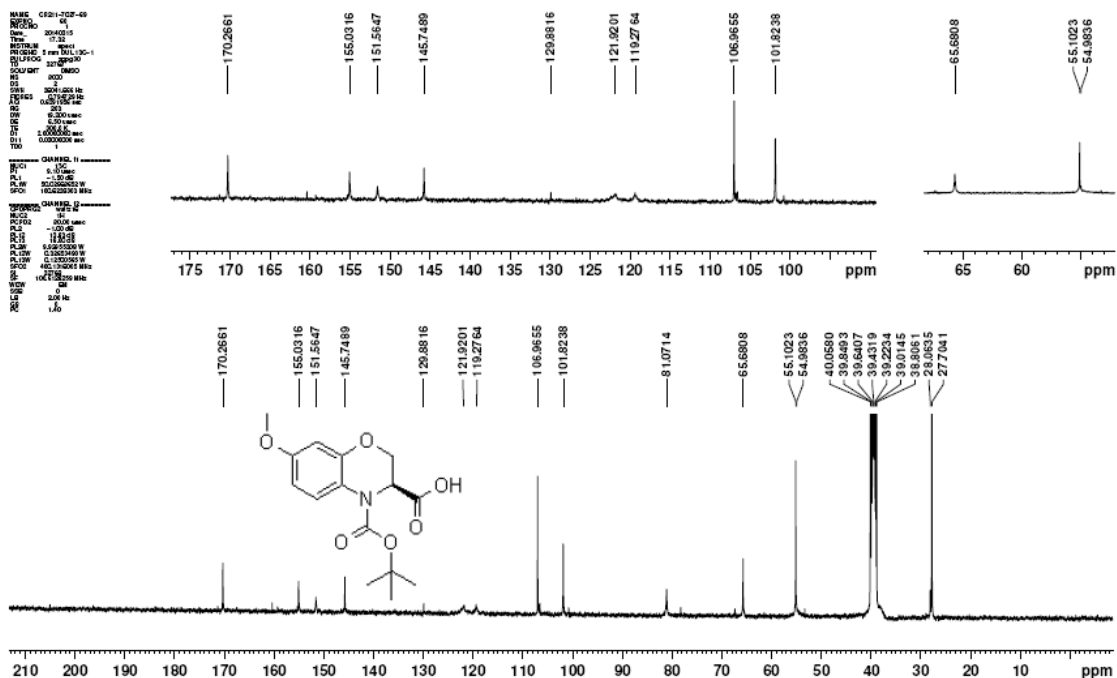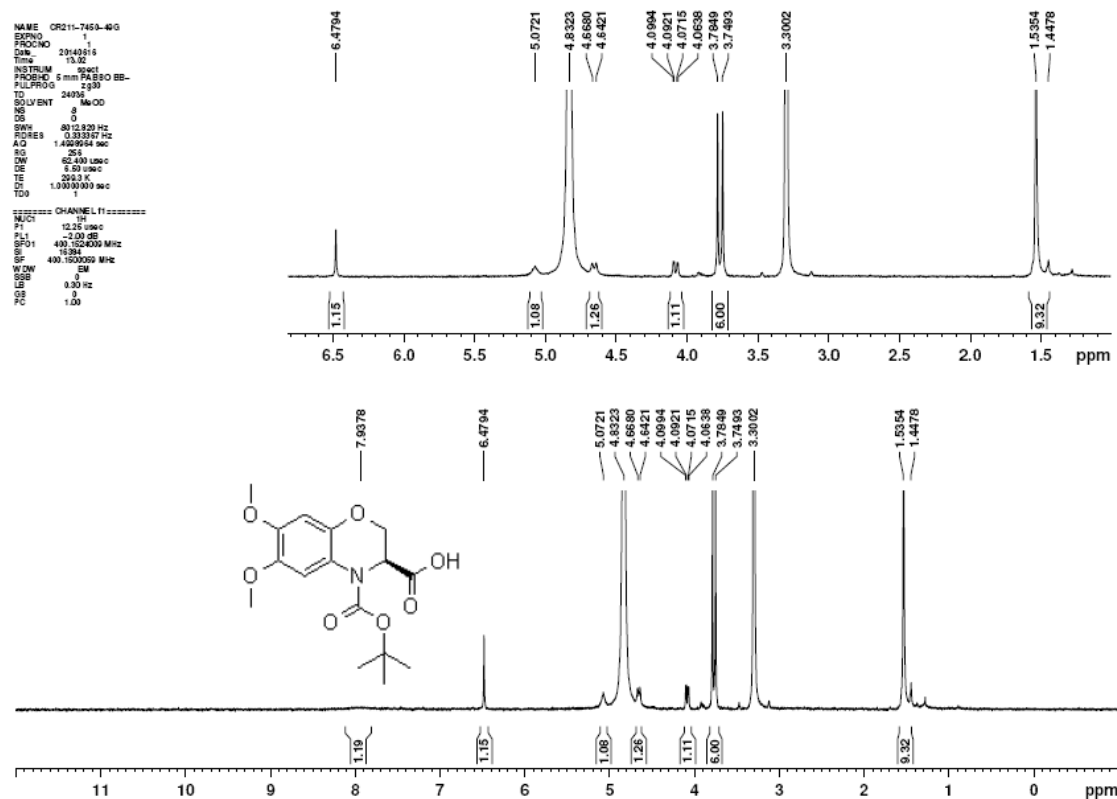

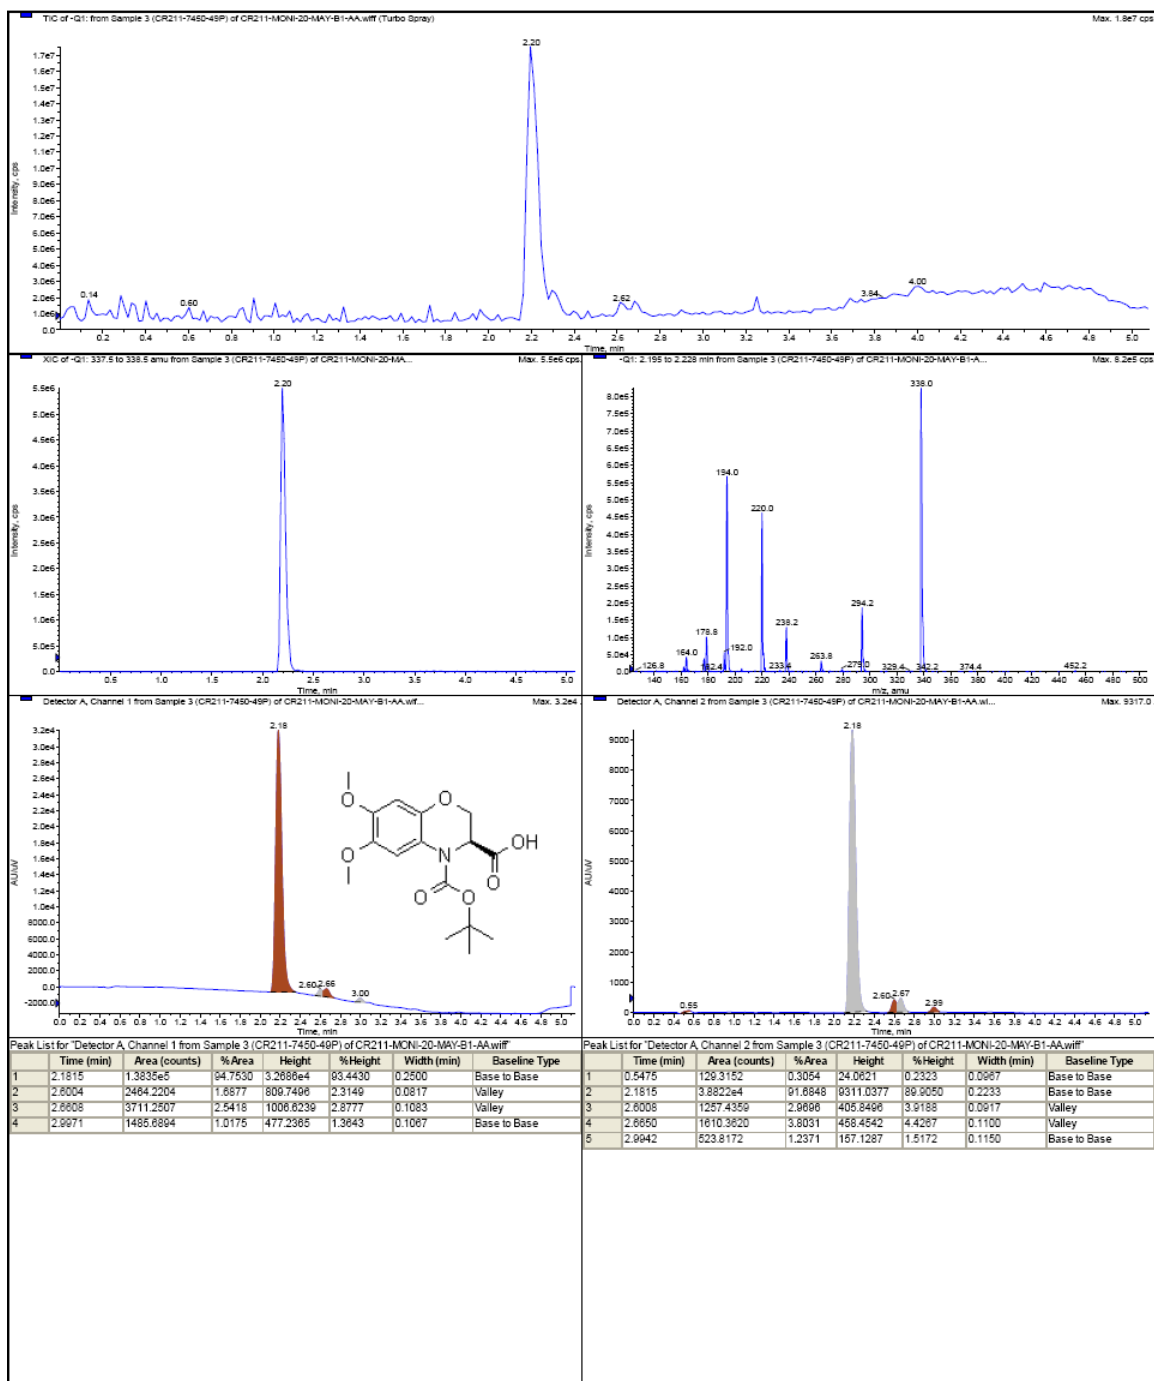

## LCMS spectrum of compound 4g



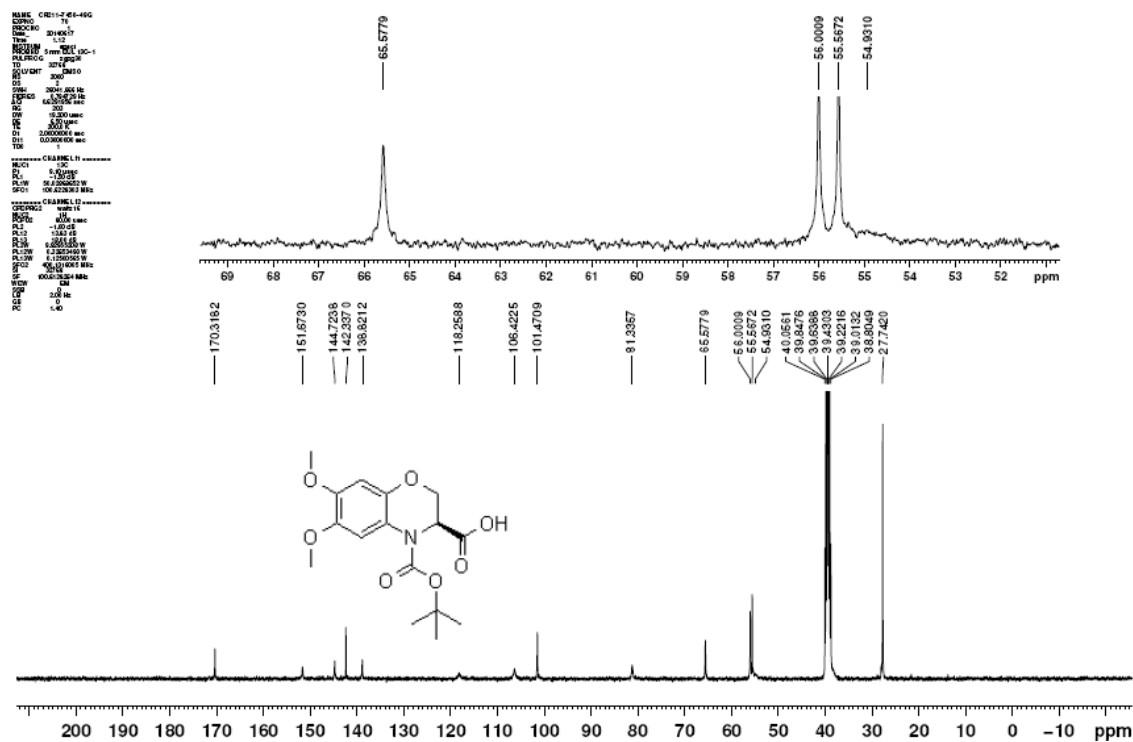

**<sup>13</sup>C NMR spectrum (100MHz, DMSO-d<sub>6</sub>) of compound 4g**

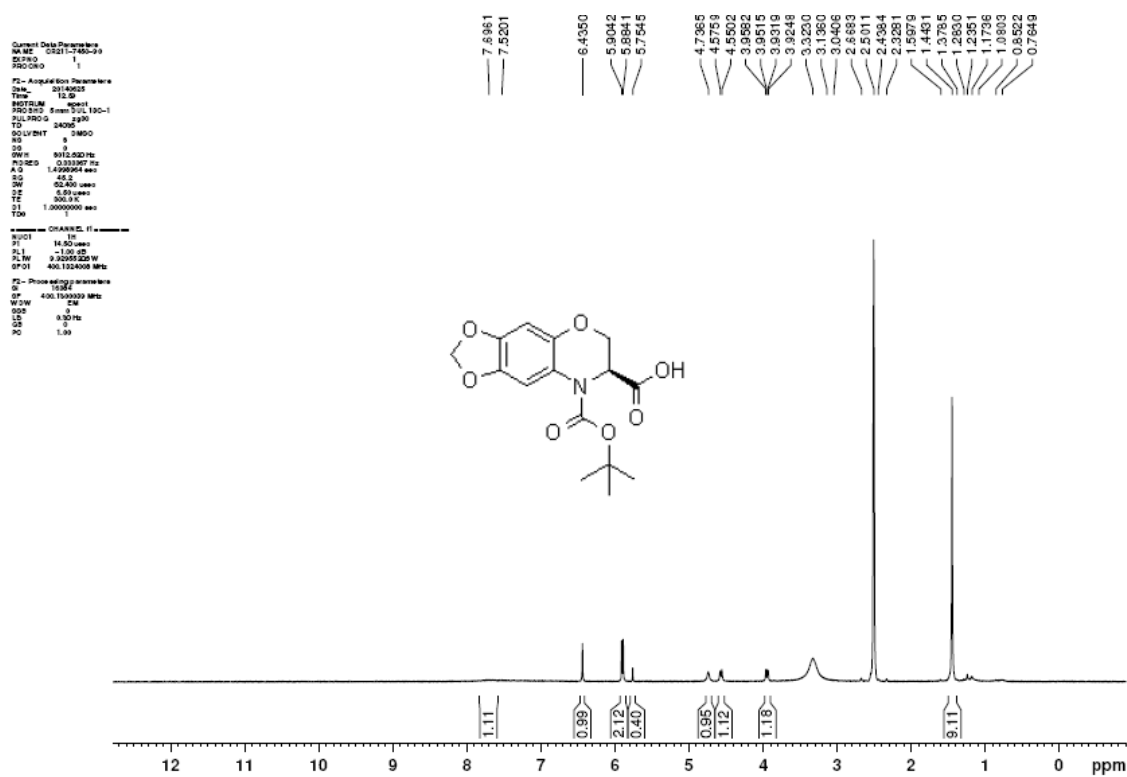

**<sup>1</sup>H NMR spectrum (400MHz, DMSO-d<sub>6</sub>) of compound 4h**

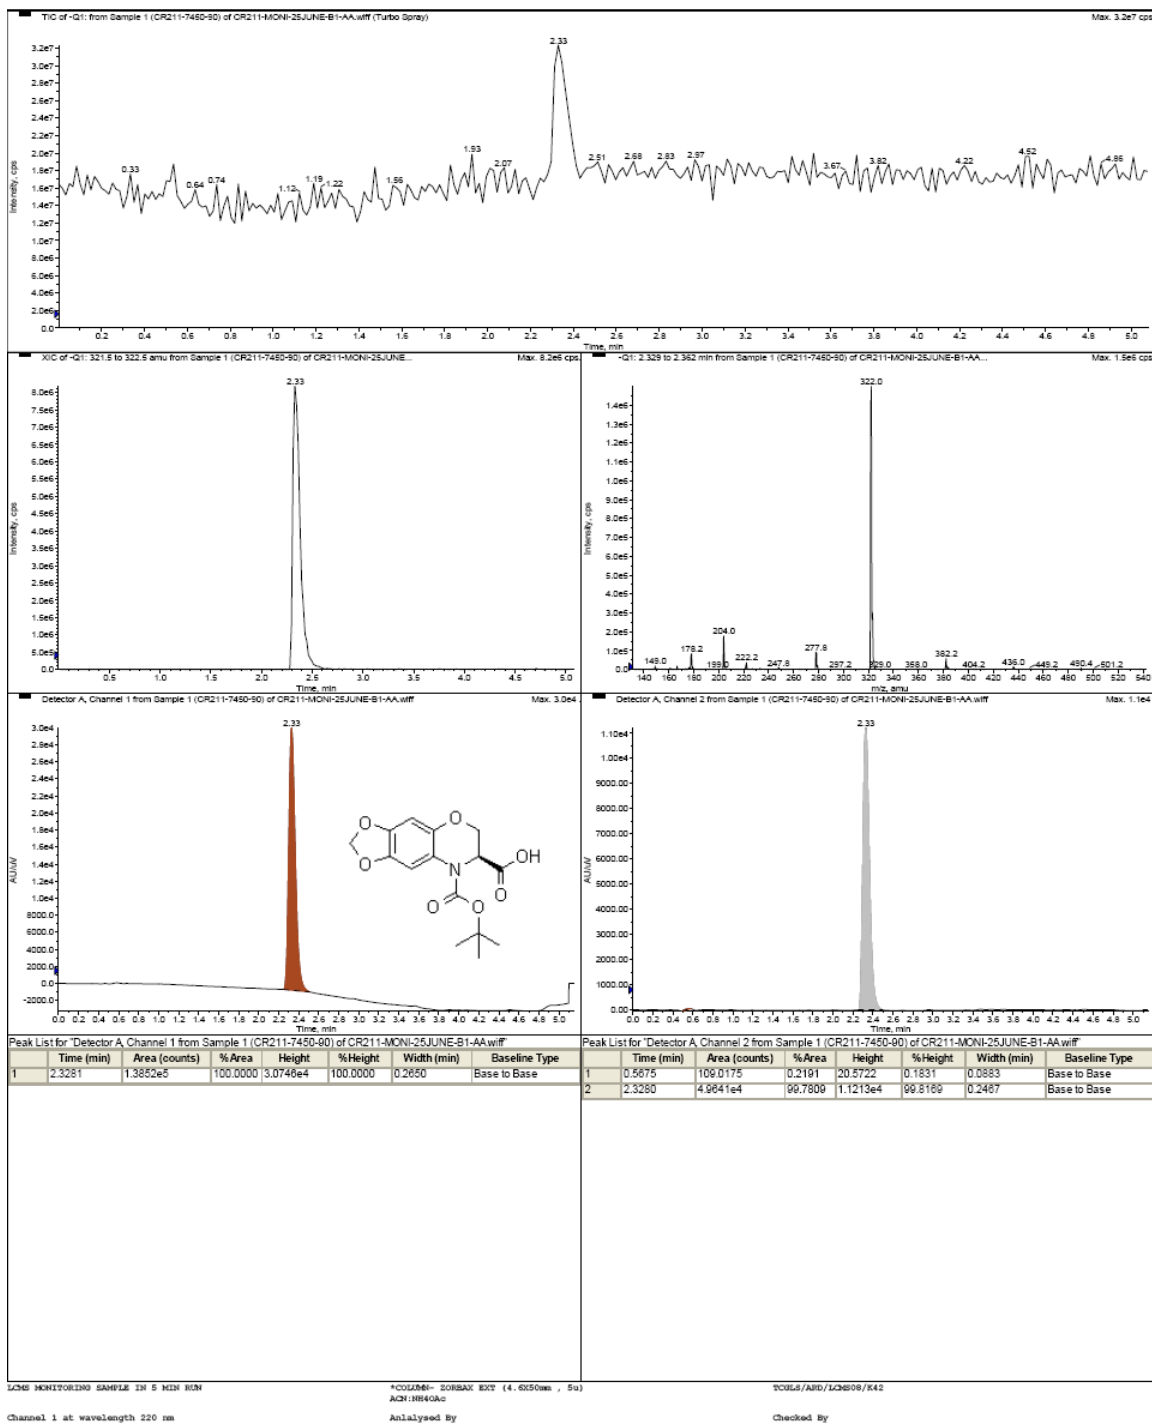

## LCMS spectrum of compound 4h

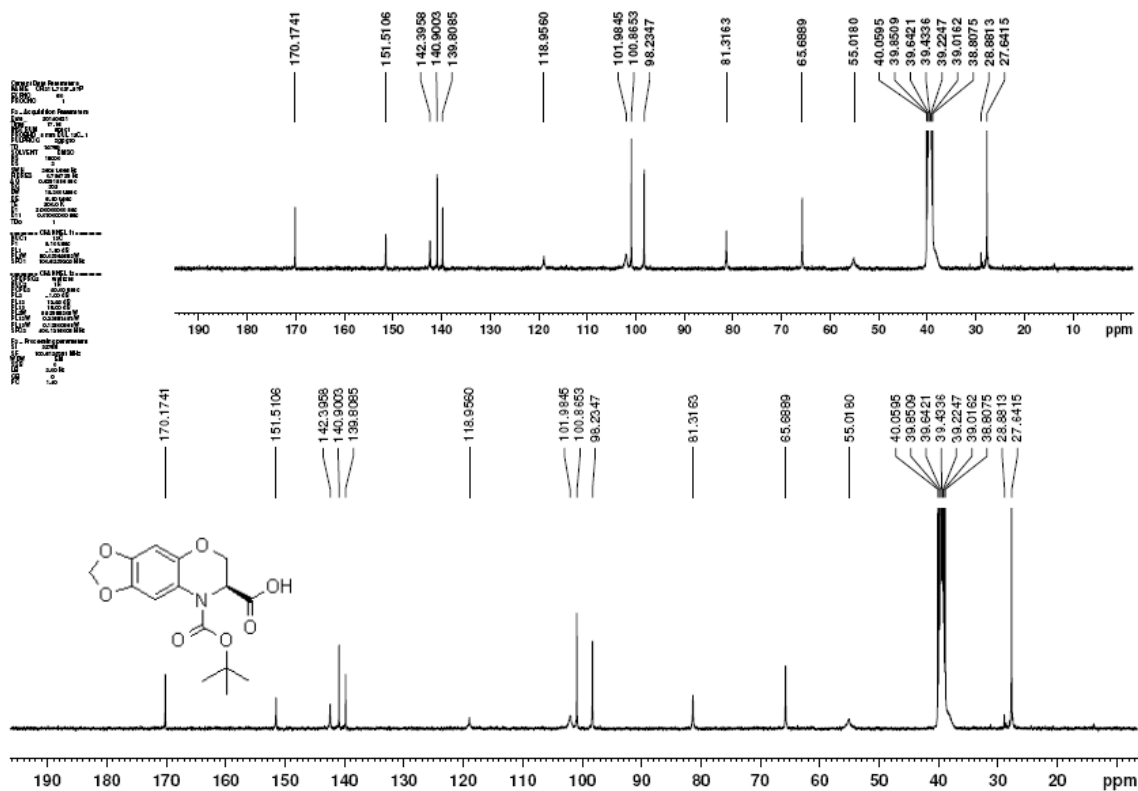

**<sup>13</sup>C NMR spectrum (100MHz, DMSO-d<sub>6</sub>) of compound 4h**

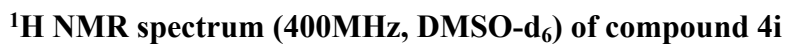

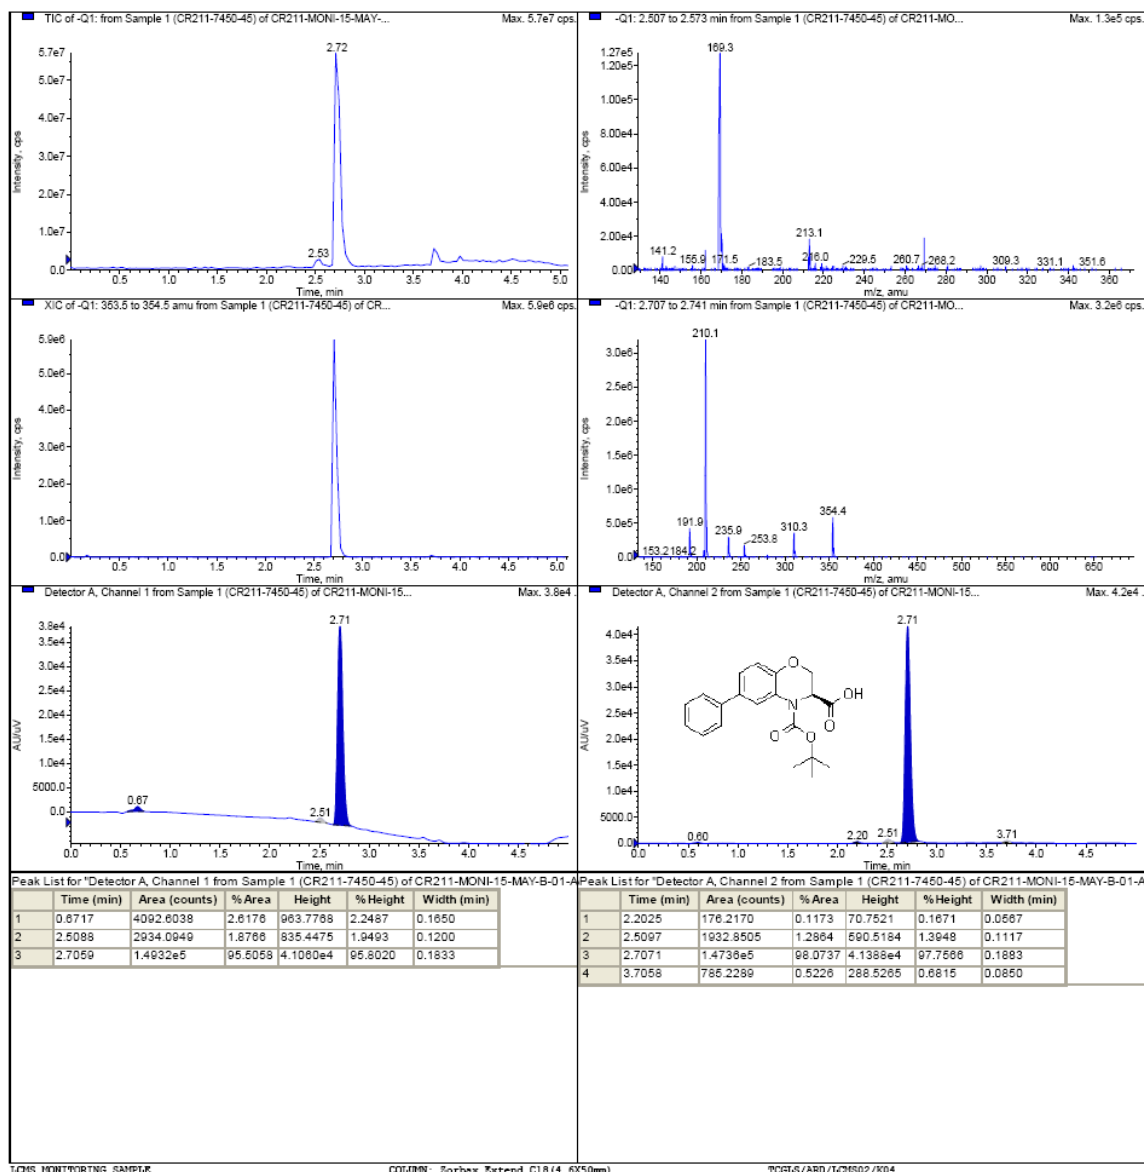

LCMS MONITORING SAMPLE

COLORIN: Sorbax Extend C18(4.6X50mm)

TCGLS/ARD/LCMS02/E04

Channel 1 at wavelength 220 nm,  
Channel 2 at wavelength 260 nm

NE40Ac:ACN

Analysed by

## LCMS spectrum of compound 4i



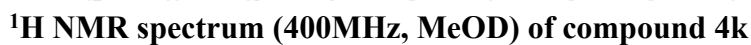

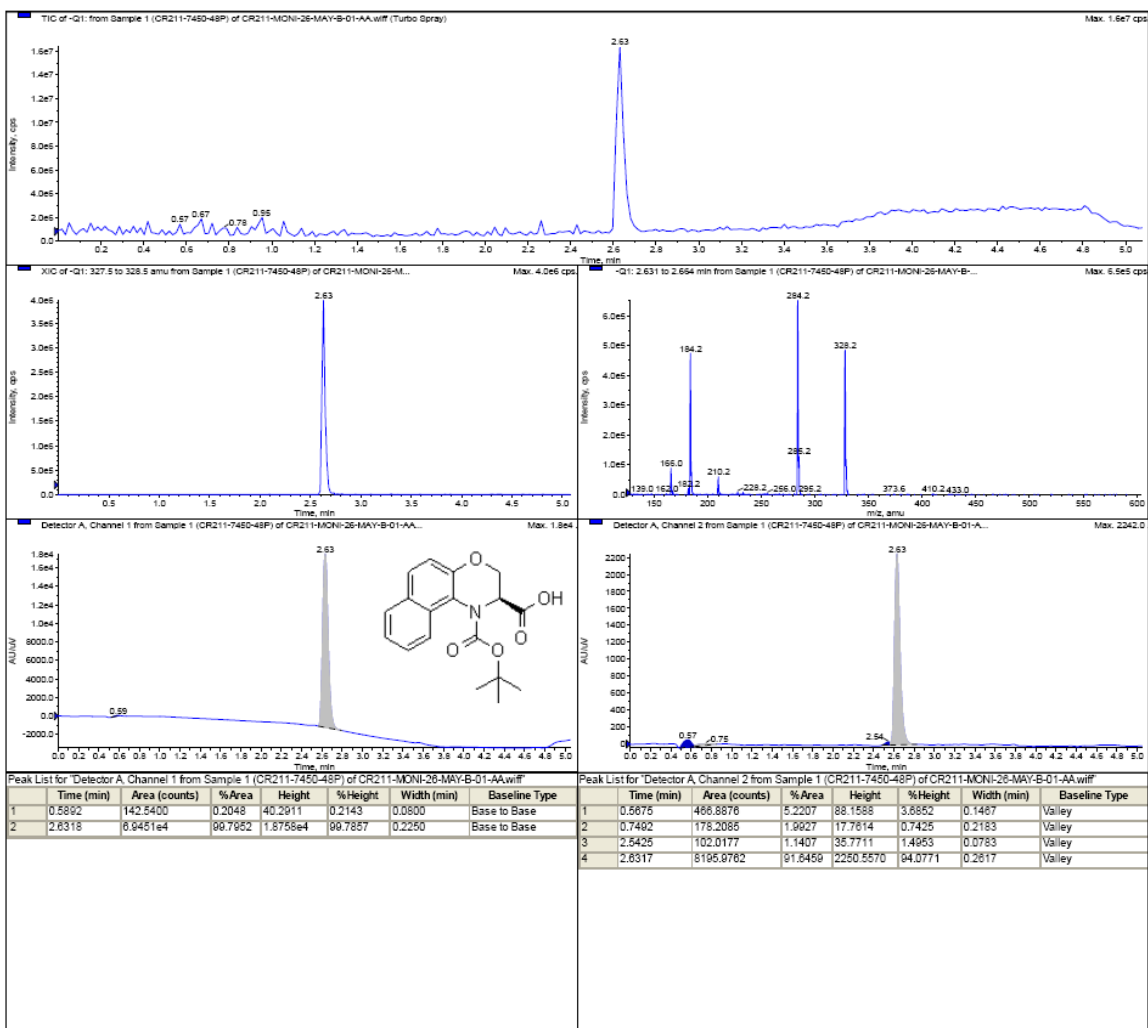

Channel 1 at wavelength 220 nm  
Channel 2 at wavelength 260 nm

Analysed By

Checked By

LCMS spectrum of compound 4k



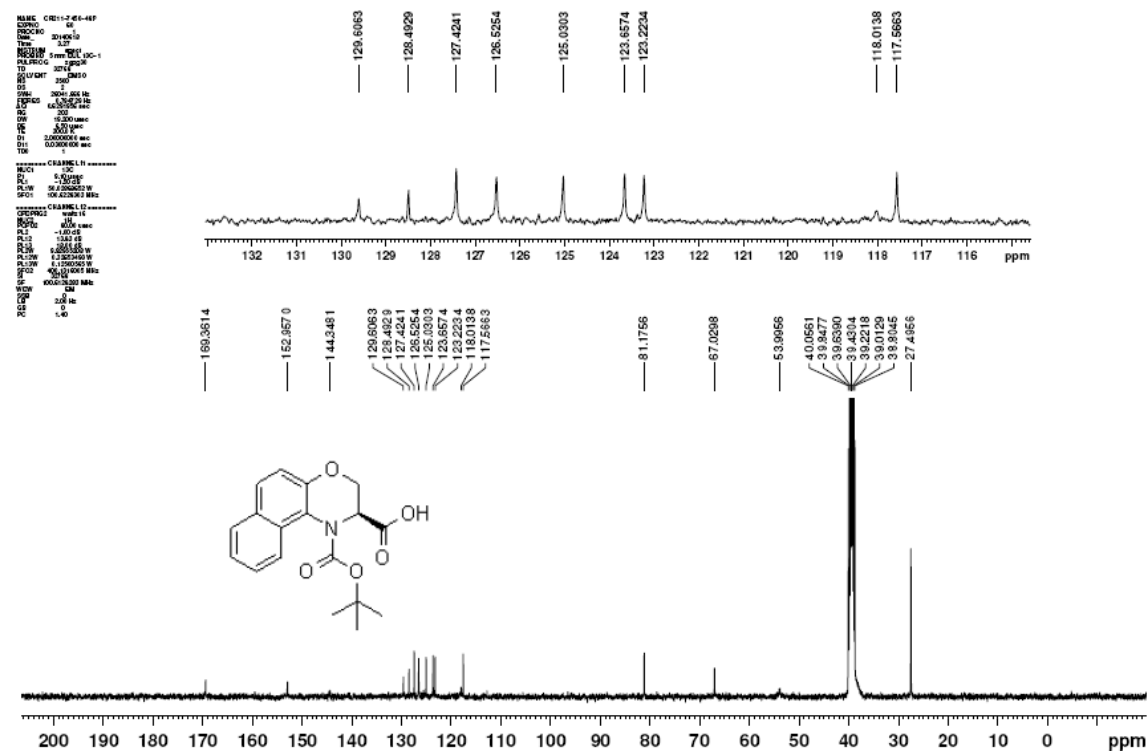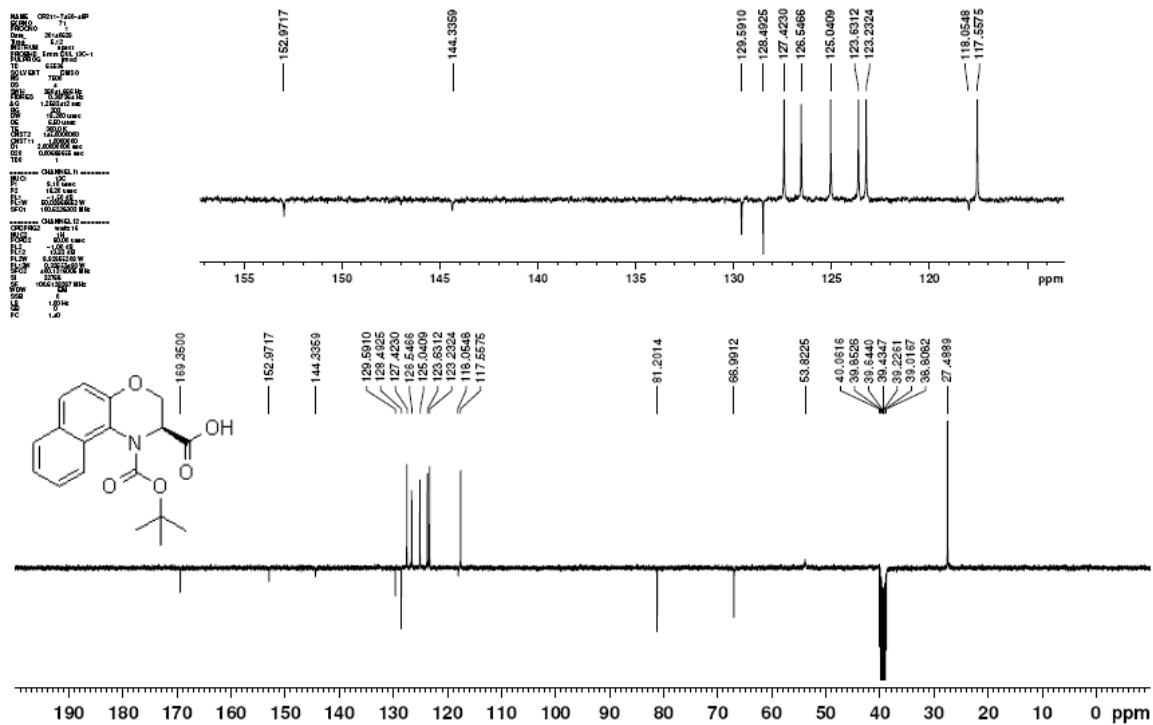

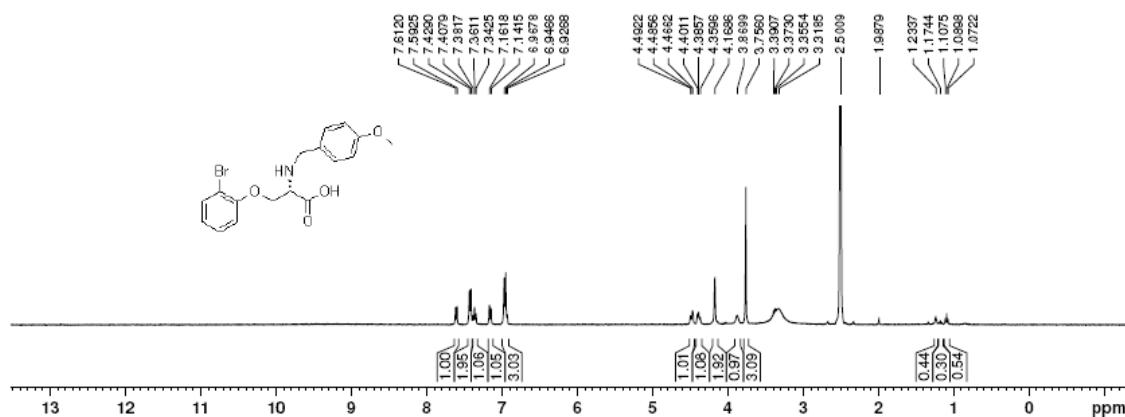

**<sup>1</sup>H NMR spectrum (400MHz, DMSO-d<sub>6</sub>) of compound 10a**

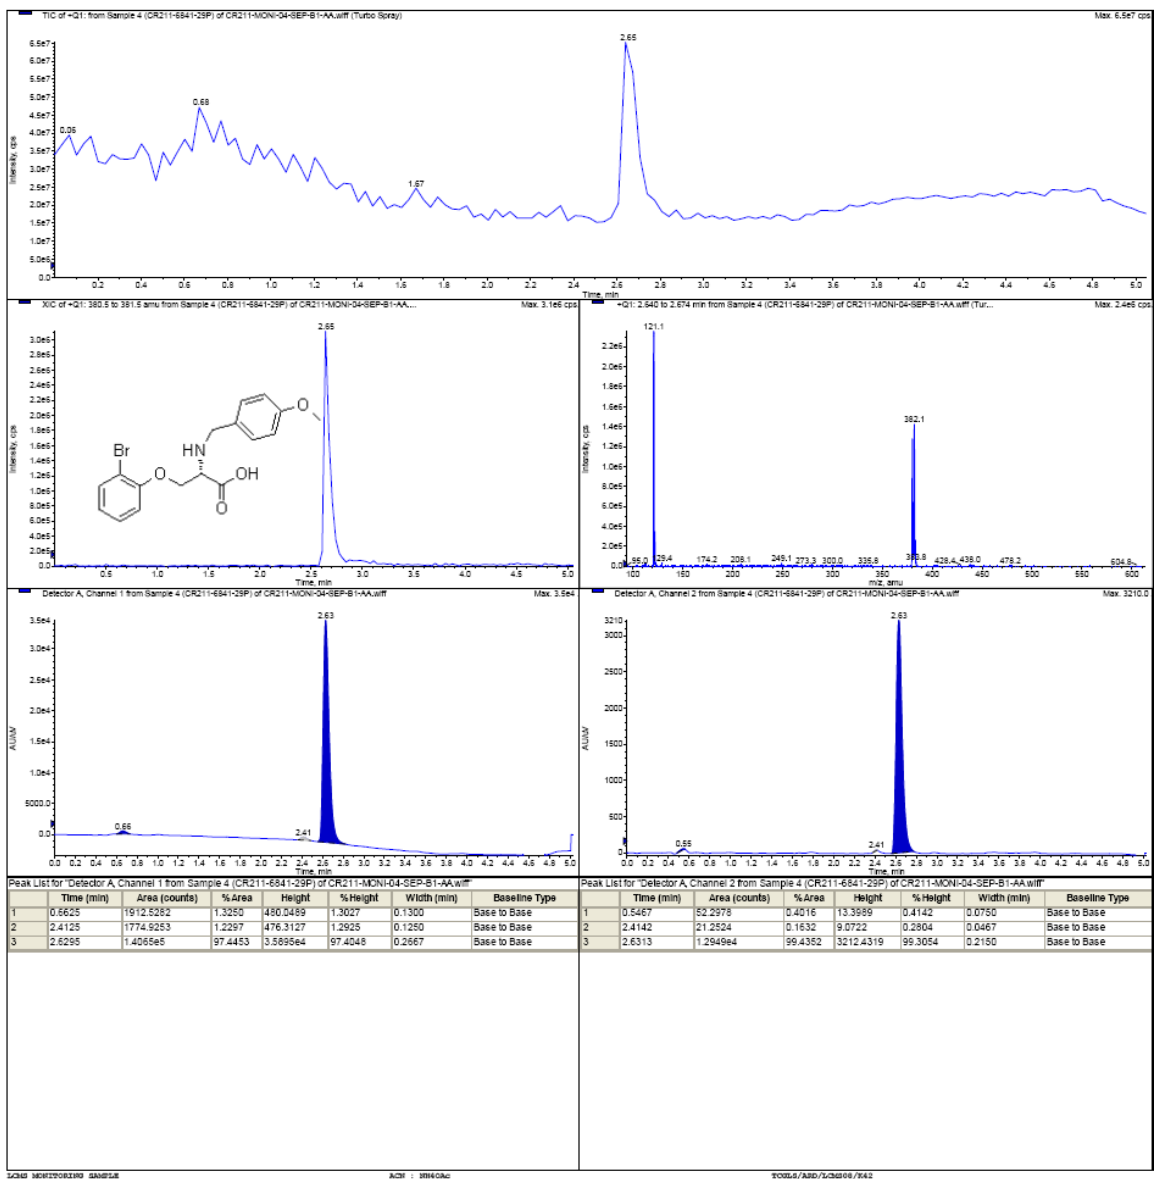

Channel 1 at wavelength 220 nm,  
Channel 2 at wavelength 260 nm

Column: BORBAX HYPERBOND C18 (50x4.6mm) 5µ

Analysed by

## LCMS spectrum of compound 10a

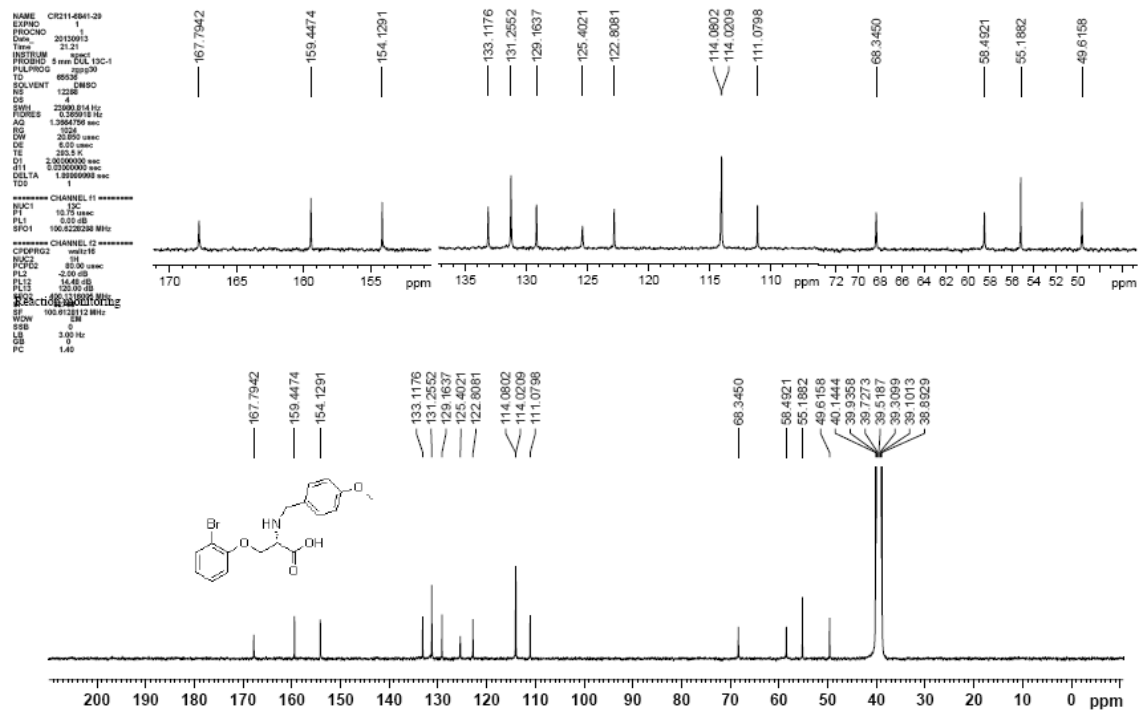

**<sup>13</sup>C NMR spectrum (100MHz, DMSO-d<sub>6</sub>) of compound 10a**

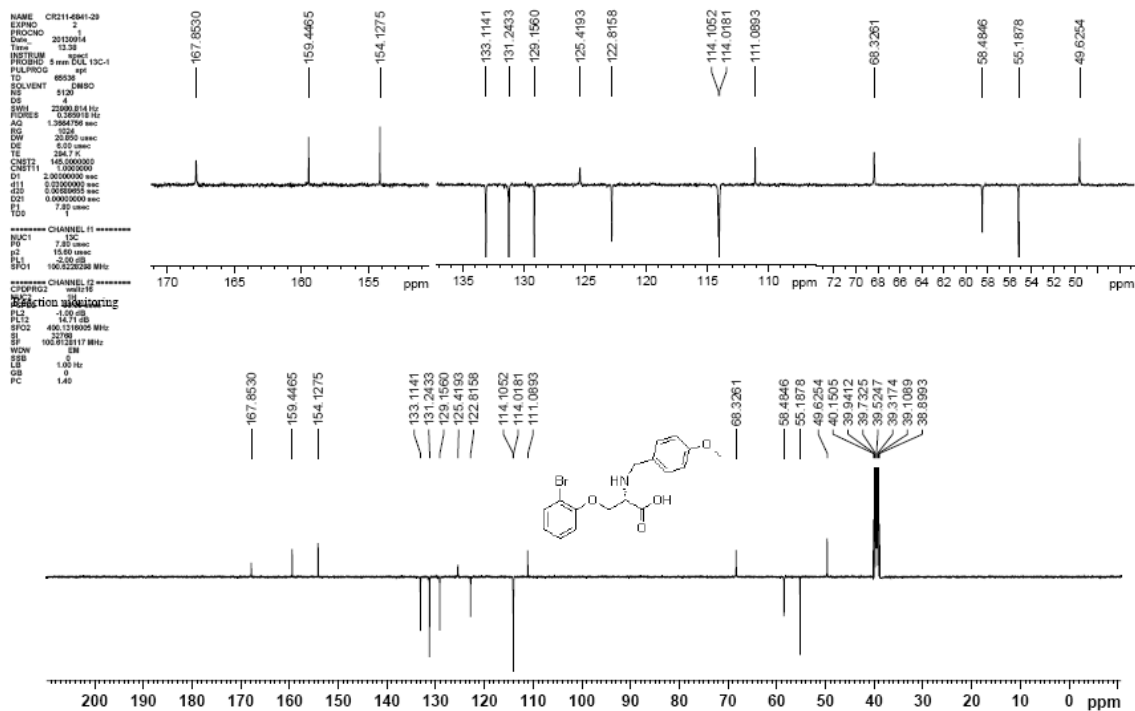

**APT NMR spectrum (100MHz, DMSO-d<sub>6</sub>) of compound 10a**

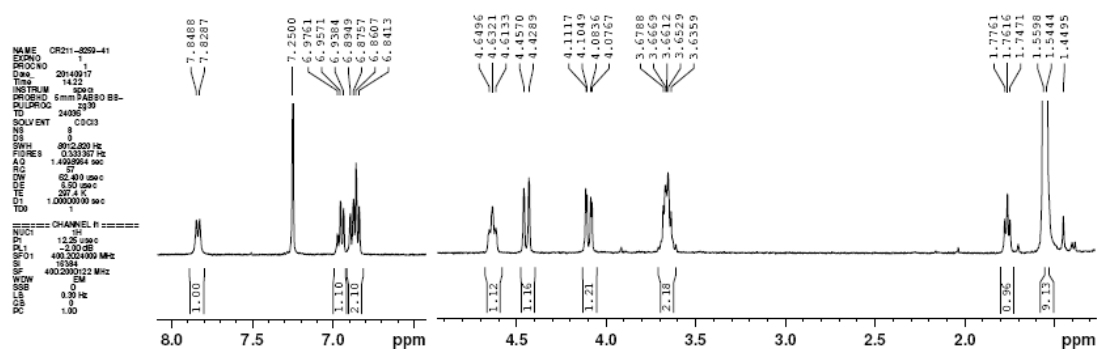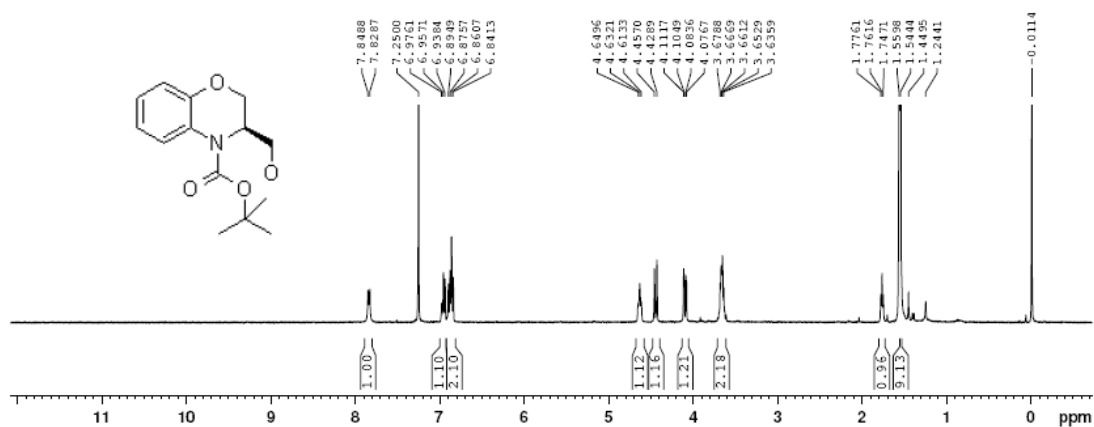

<sup>1</sup>H NMR spectrum (400MHz, CDCl<sub>3</sub>) of compound 12a

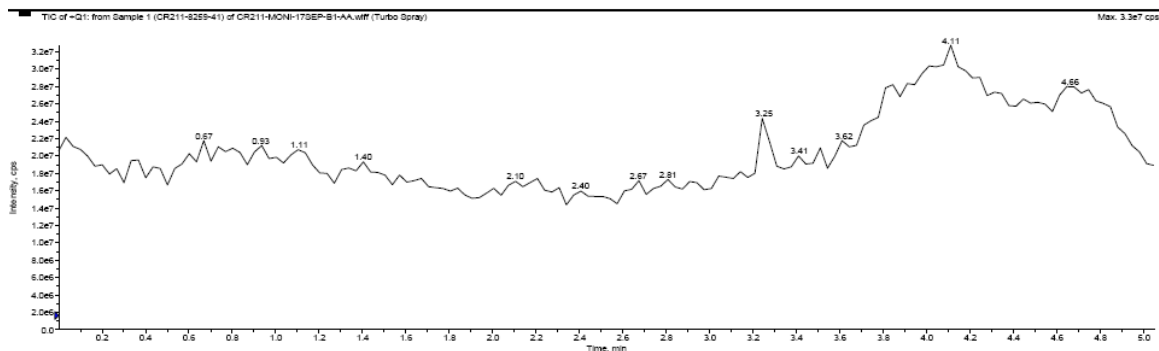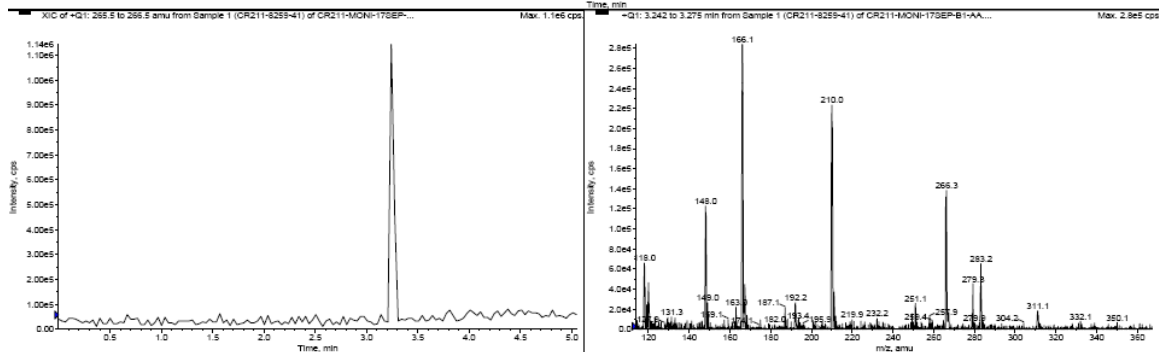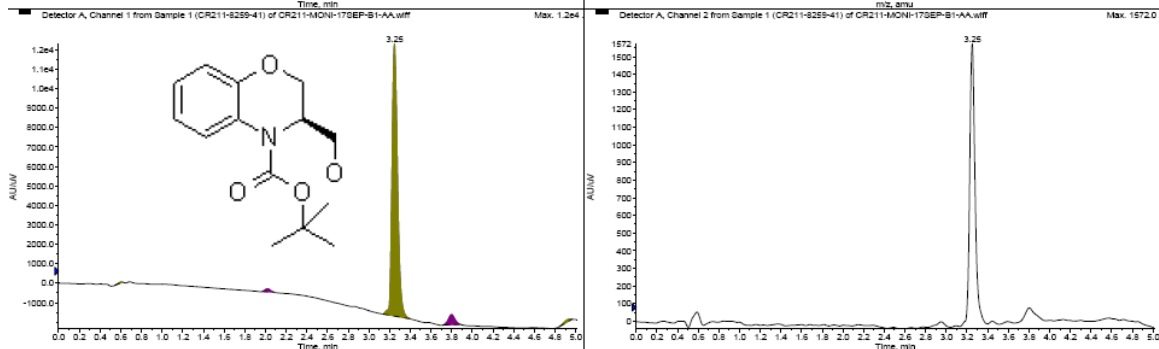

Peak List for 'Detector A, Channel 1 from Sample 1 (CR211-8259-41) of CR211-MONI-17SEP-B1-AA.wiff'

|   | Time (min) | Area (counts) | %Area   | Height   | %Height | Width (min) | Baseline Type |
|---|------------|---------------|---------|----------|---------|-------------|---------------|
| 1 | 0.6067     | 117.1511      | 0.2172  | 36.8027  | 0.2491  | 0.0767      | Base to Base  |
| 2 | 2.0200     | 543.3418      | 1.0072  | 153.7812 | 1.0411  | 0.1133      | Base to Base  |
| 3 | 3.2475     | 5.0610e4      | 93.8146 | 1.3995e4 | 94.7300 | 0.2833      | Base to Base  |
| 4 | 3.8008     | 2237.3023     | 4.1472  | 521.8326 | 3.5313  | 0.1683      | Base to Base  |
| 5 | 4.9458     | 436.0097      | 0.8138  | 66.1110  | 0.4476  | 0.1233      | Base to Base  |

LCMS MONITORING SAMPLE IN 5 MIN RUN

\*COLUMN: ZORBAX EXT (4.6X50mm, 5u)

TC056/ABD/LCMS08/642

Channel 1 at wavelength 220 nm

ANALYSED BY

Checked By

LCMS spectrum of compound 12a

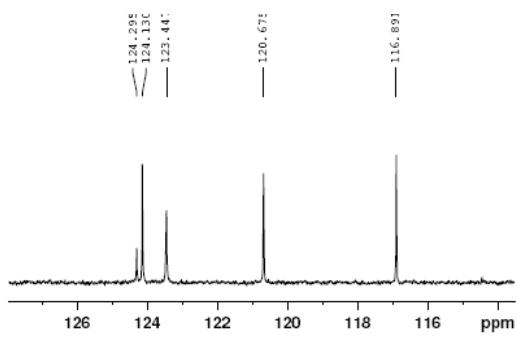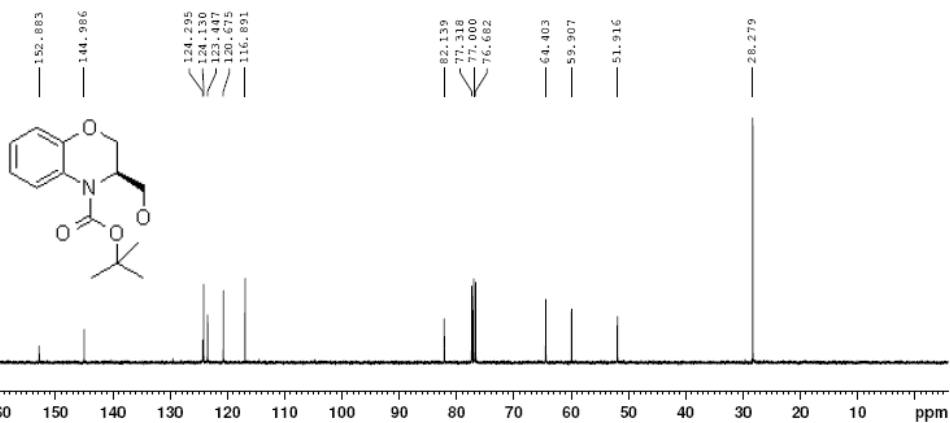

**<sup>13</sup>C NMR spectrum (100MHz, CDCl<sub>3</sub>) of compound 12a**

Sample Name : CR211-8259-41-RECEMIC  
 Seq Line-> 13  
 Location : Vial 73  
 Acq Operator : KONDABABU  
 Inj. No. : 1  
 Injection Date : 10/13/2014  
 Inj. Vol. : 1 µl  
 Acq. Method : C:\Chem32\1\DATA\OCT-2014\131014 2014-10-13 11-13-36->  
 Analysis Method : C:\CHEM32\1\METHODS\100-ETOH.M  
 Last Changed : Mon, 13. Oct. 2014, 02:16:16 pm  
 (modified after loading)  
 Samole ID :CR211-8259-41-RECEMIC

Column Name : Chiralpak AD-H(250x4.6mm)5µ  
 ARD/K/7842  
 Mobile Phase:EtOH:100  
 Flow Rate:0.5 ml/min  
 Solubility:MeOH

Ref : KD/13.10.14/409

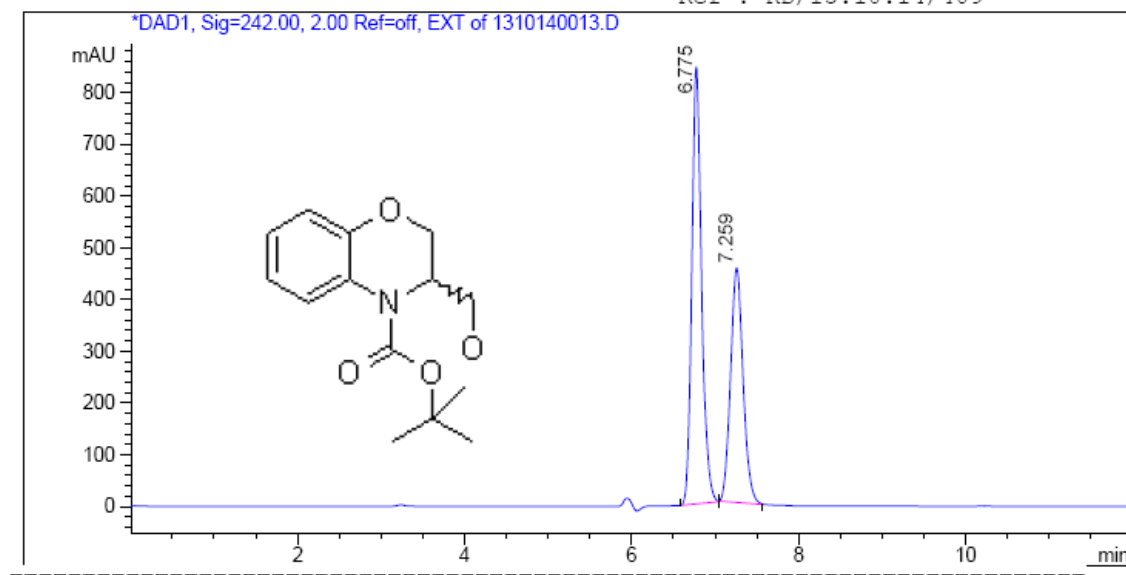

Signal 1: DAD1, Sig=242.00, 2.00 Ref=off, EXT

| Peak # | RT [min] | Area    | Area % |
|--------|----------|---------|--------|
| 1      | 6.78     | 6839.40 | 59.14  |
| 2      | 7.26     | 4725.63 | 40.86  |

**Chiral HPLC of a mixture of D- and L-isomer of the compound 12a, prepared by external mixing (not racemic mixture)**



Sample Name : CR211-8259-41L Seq Line-> 11  
 Location : Vial 74  
 Acq Operator : KONDABABU Inj. No. : 1  
 Injection Date : 10/13/2014 Inj. Vol. : 2 µl  
 Acq. Method : C:\Chem32\1\DATA\OCT-2014\131014 2014-10-13 11-13-36->  
 Analysis Method : C:\CHEM32\1\METHODS\100-ETOH.M  
 Last Changed : Mon, 13. Oct. 2014, 02:16:16 pm  
 (modified after loading)  
 Samole ID :CR211-8259-41L

Column Name : Chiralpak AD-H(250x4.6mm) 5µ  
 ARD/K/7842  
 Mobile Phase:EtOH:100  
 Flow Rate:0.5 ml/min  
 Solubility:MeOH

Ref : KD/13.10.14/410

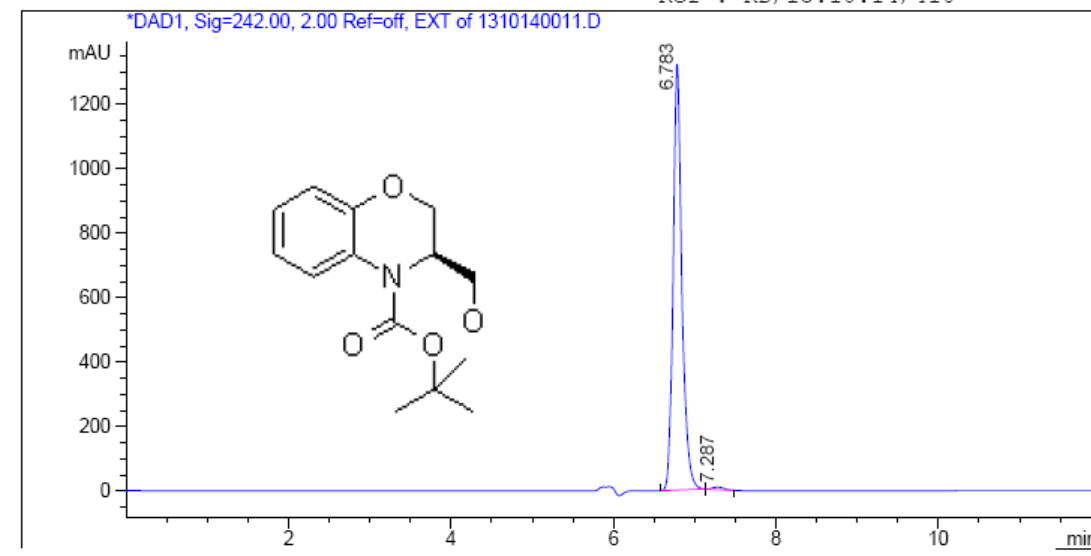

Signal 1: DAD1, Sig=242.00, 2.00 Ref=off, EXT

| Peak # | RT [min] | Area    | Area % |
|--------|----------|---------|--------|
| 1      | 6.78     | 9899.81 | 99.23  |
| 2      | 7.29     | 77.16   | 0.77   |

=====

**Chiral HPLC of *L*-isomer 12a**

Sample Name : CR211-8259-41D Seq Line-> 12  
 Location : Vial 75  
 Acq Operator : KONDABABU Inj. No. : 1  
 Injection Date : 10/13/2014 Inj. Vol. : 2 µl  
 Acq. Method : C:\Chem32\1\DATA\OCT-2014\131014 2014-10-13 11-13-36->  
 Analysis Method : C:\CHEM32\1\METHODS\100-ETOH.M  
 Last Changed : Mon, 13. Oct. 2014, 02:16:16 pm  
 (modified after loading)  
 Samole ID :CR211-8259-41D

Column Name : Chiralpak AD-H (250x4.6mm) 5µ  
 ARD/K/7842  
 Mobile Phase:EtOH:100  
 Flow Rate:0.5 ml/min  
 Solubility:MeOH

Ref : KD/13.10.14/411

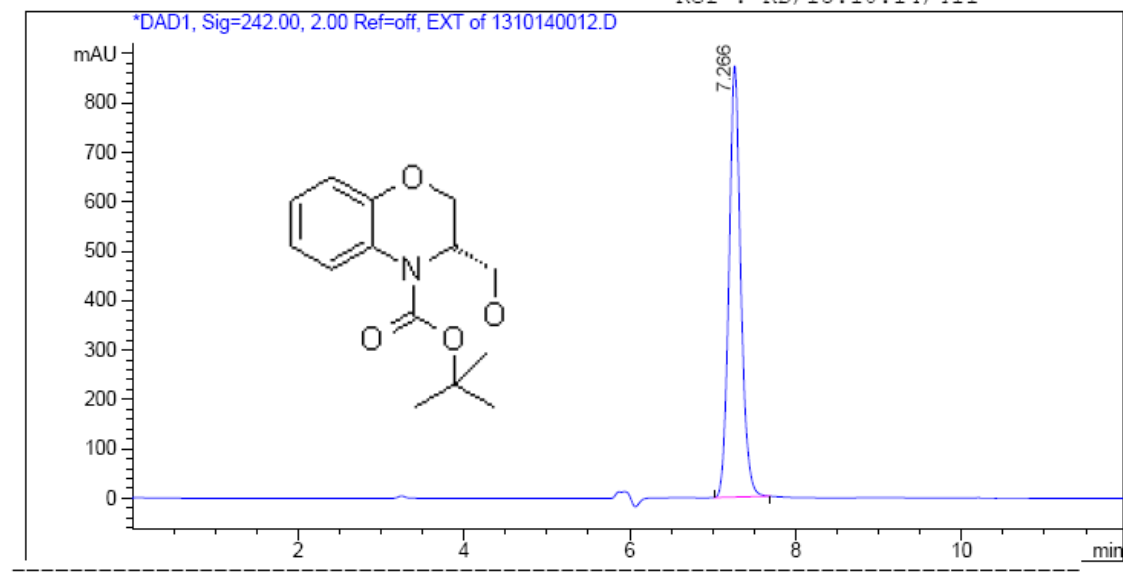

Signal 1: DAD1, Sig=242.00, 2.00 Ref=off, EXT

| Peak # | RT [min] | Area    | Area % |
|--------|----------|---------|--------|
| 1      | 7.27     | 8639.68 | 100.00 |

## Chiral HPLC of *D*-isomer 12a

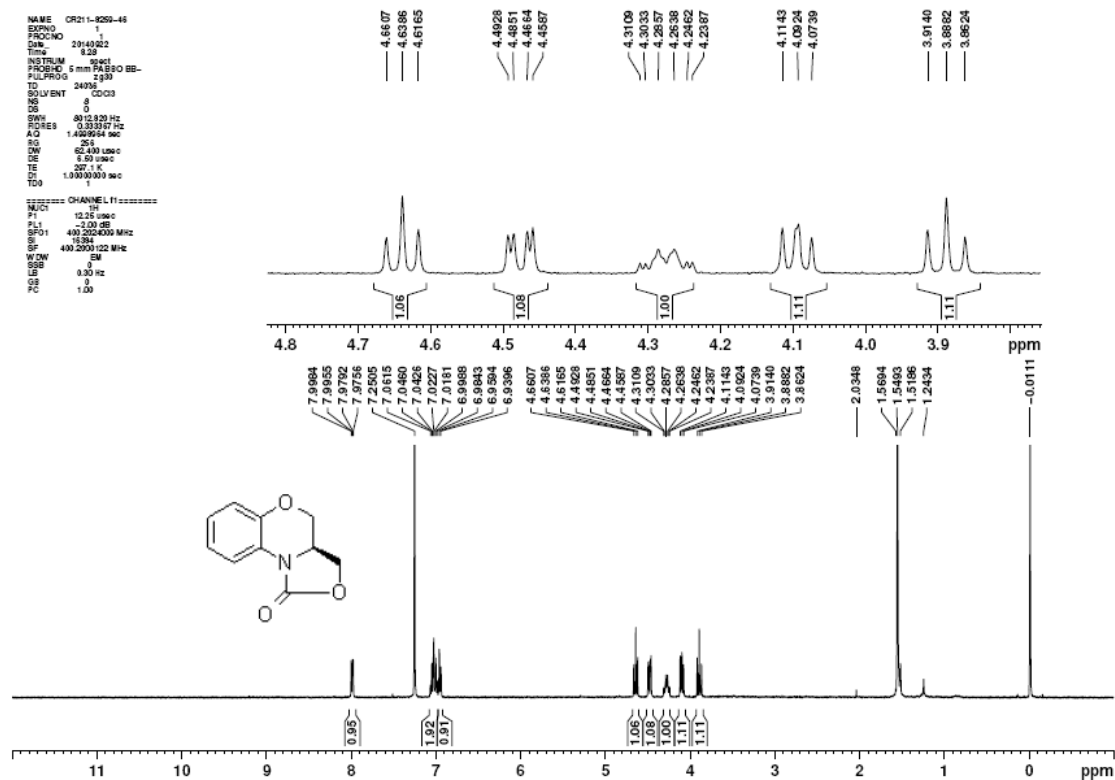

**<sup>1</sup>H NMR spectrum (400MHz, CDCl<sub>3</sub>) of compound 13a**

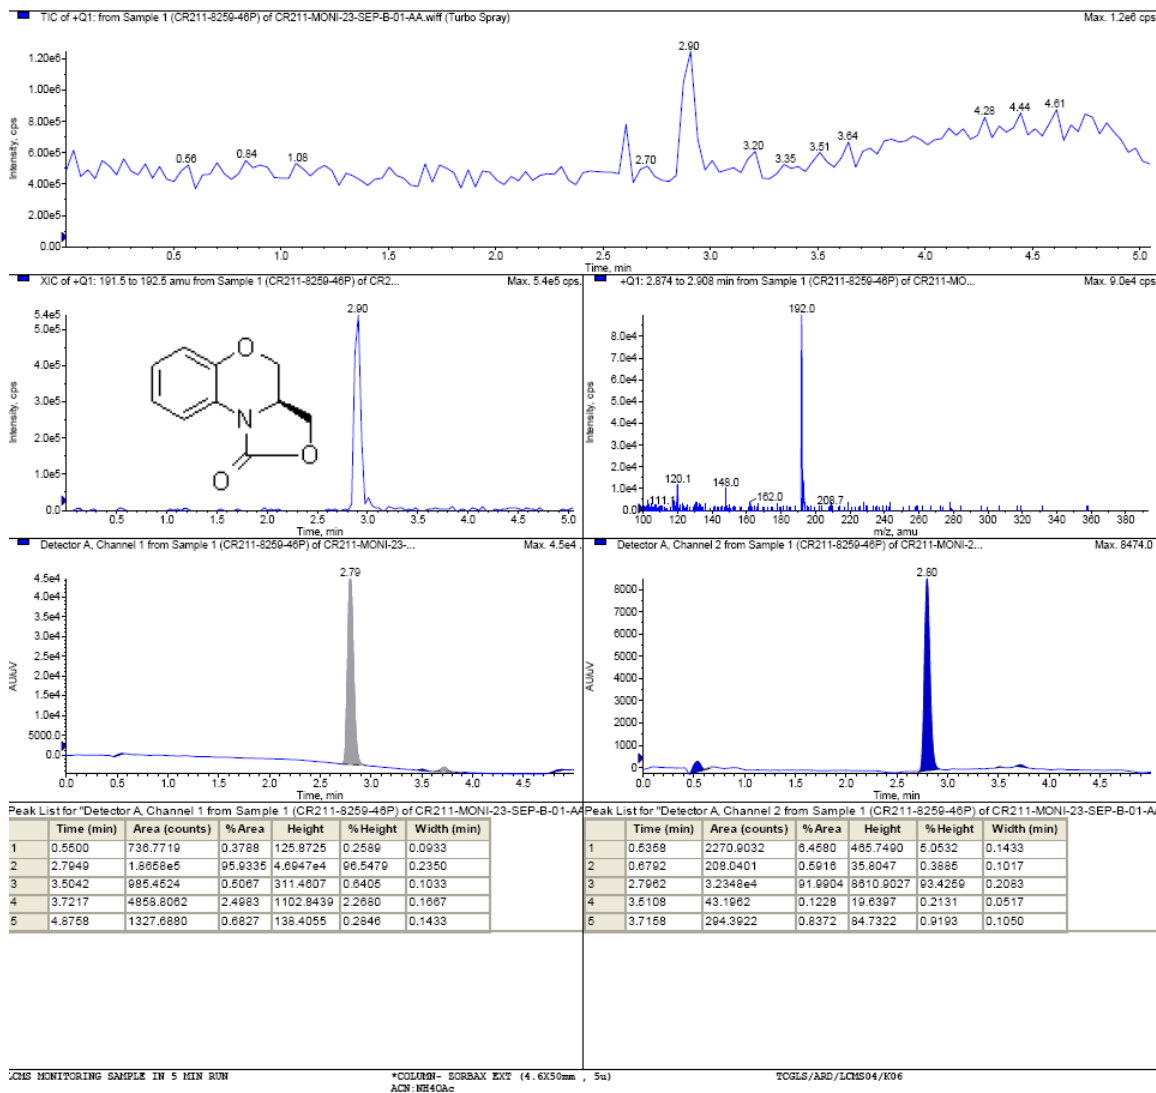

Channel 1 at wavelength 220 nm  
Channel 2 at wavelength 260 nm

Analysed By

Checked By

## LCMS spectrum of compound 13a

File : C:\MSDCHEM\1\DATA\SEPT--14B\23091404.D  
Operator :  
Acquired : 23 Sep 2014 12:24 using AcqMethod TCG50  
Instrument : Instrumen  
Sample Name: CR211-8259-46P  
Misc Info :  
Vial Number: 2

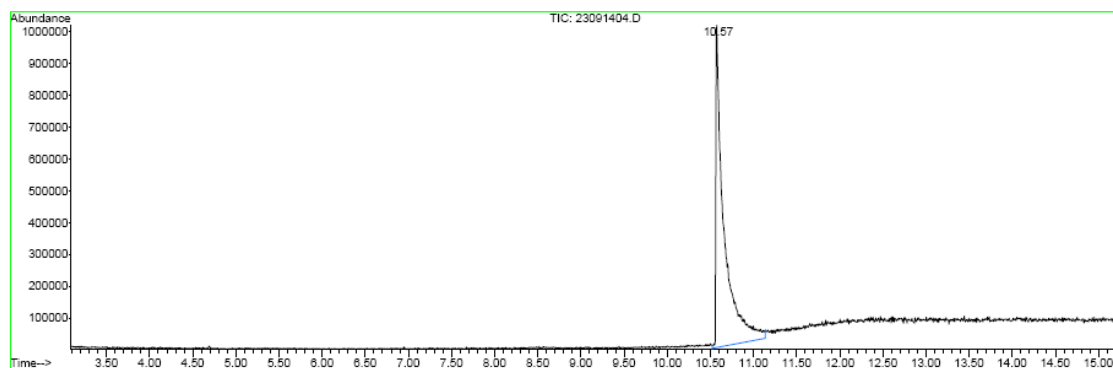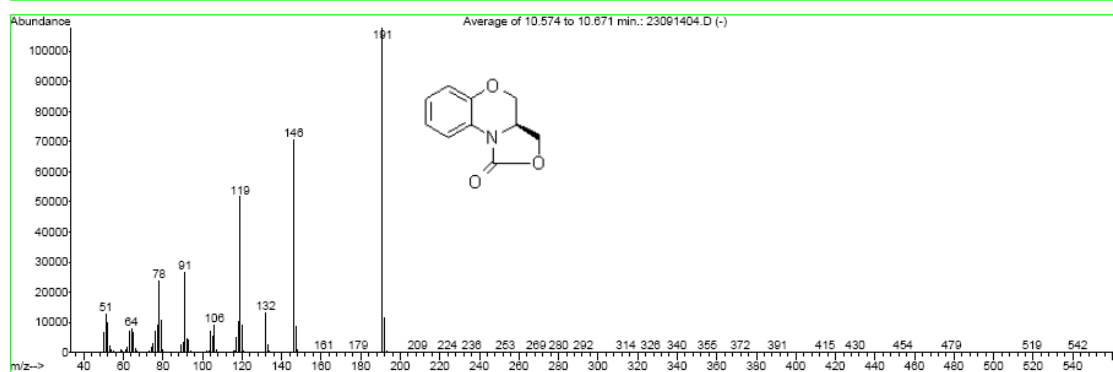

GCMS of Compound 13a

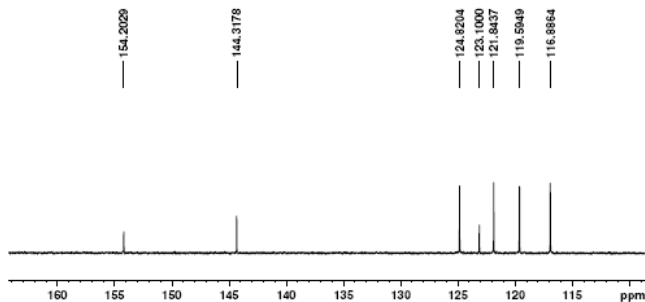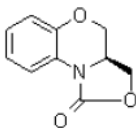

**<sup>13</sup>C NMR spectrum (100MHz, CDCl<sub>3</sub>) of compound 13a**

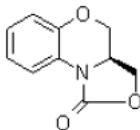

**APT NMR spectrum (100MHz, CDCl<sub>3</sub>) of compound 13a**

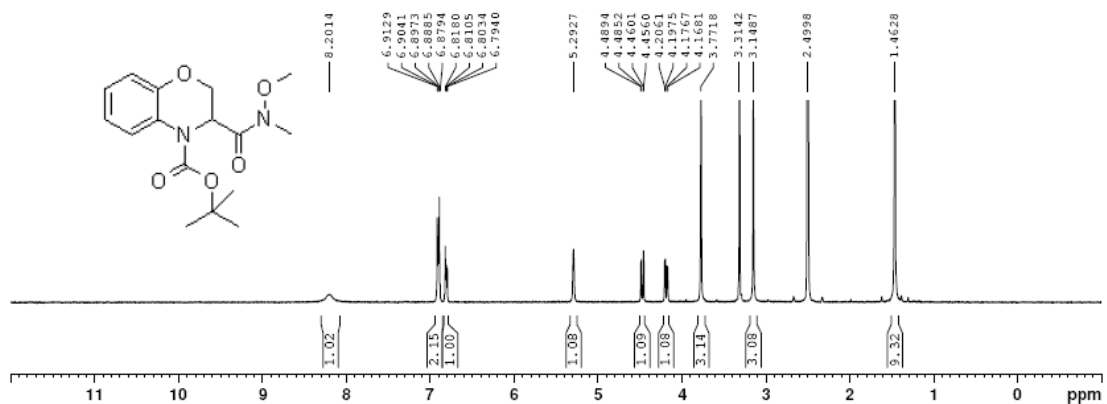

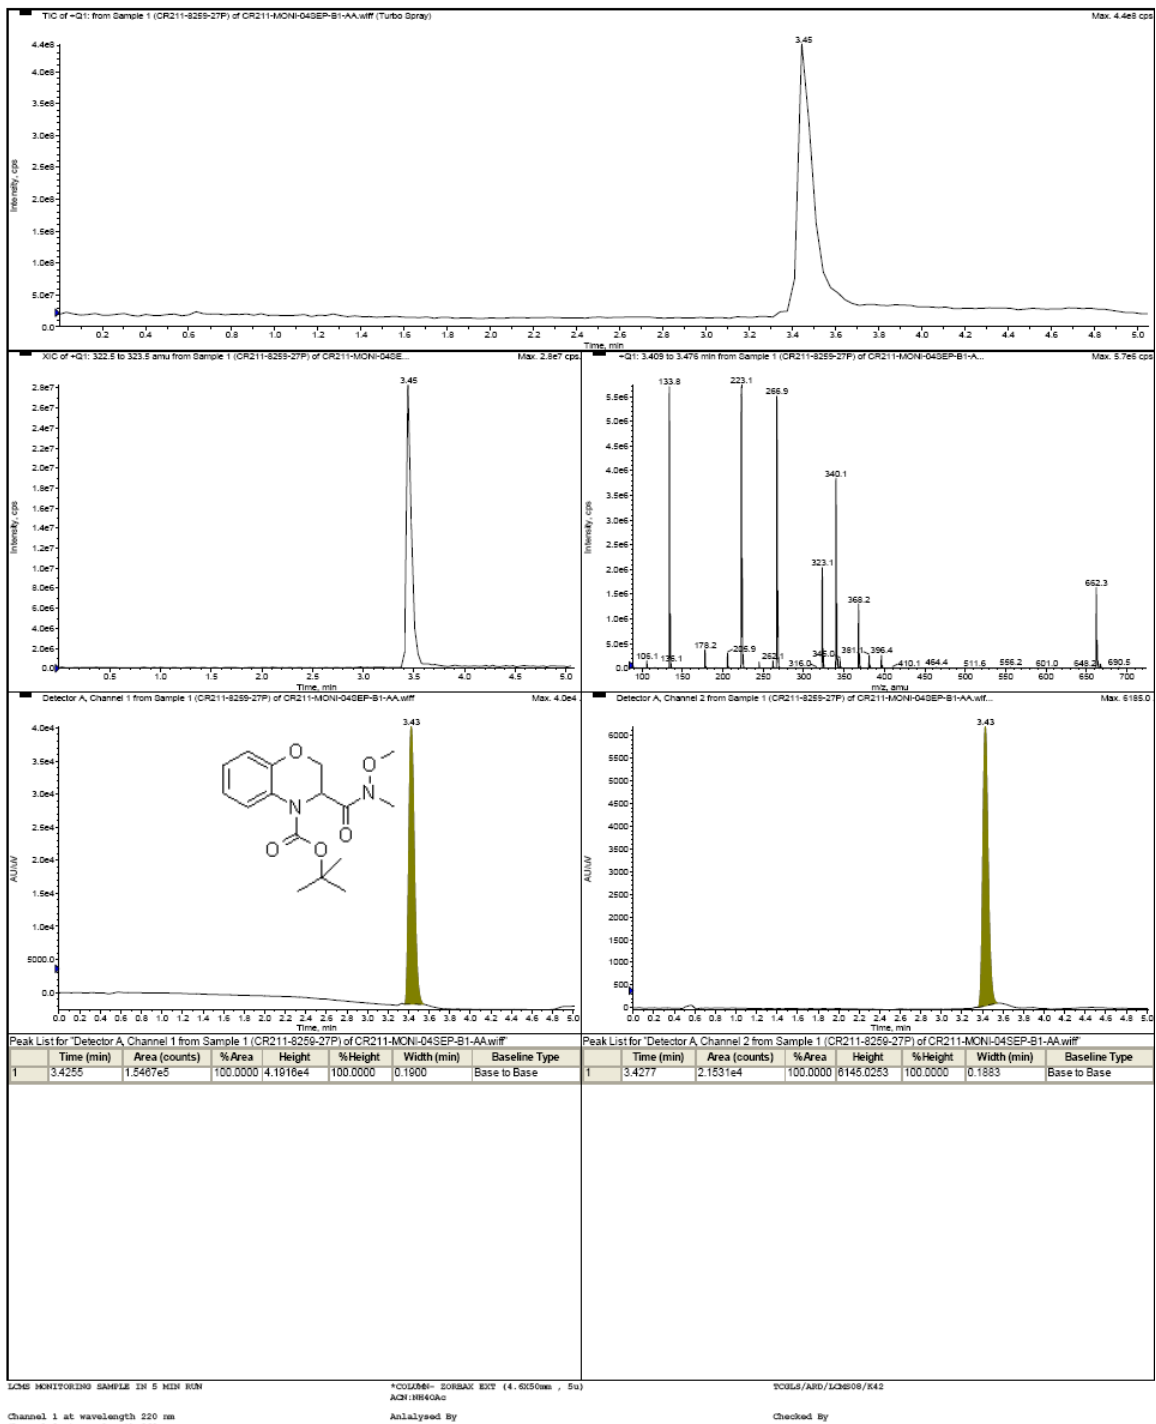

LCMS spectrum of compound 14a



NAME CR211-3269-27  
EXPNO 80  
PROCNO 1  
DATE\_ 20140608  
TIME 17.00  
INSTRUM spect  
PROBHD 5 mm DUL 13C-1  
PULPROG zgpg30  
TD 65536  
SOLVENT DMSO  
NS 2590  
DS 4  
SWH 24008.461 Hz  
FIDRES 0.360799 Hz  
AQ 1.3631989 sec  
RG 233  
DQ 20.800 usec  
DE 5.53 usec  
TE 300.3 K  
D1 2.00000000 sec  
D11 0.00000000 sec  
TD0

===== CHANNEL f1 =====  
NUC1 13C  
P1 9.13 usec  
PL1 -1.50 dB  
PL1W 60.02969152 W  
SFO1 100.615165 MHz

===== CHANNEL f2 =====  
CPDPRG2 waltz16  
NUC2 1H  
PCPD2 93.00 usec  
PL2 -1.00 dB  
PL2W 13.83 dB  
PL2 19.80 dB  
PL2W 0.22055239 W  
PL2W 0.22055239 W  
PL2W 0.1205430 W  
SFO2 400.1911904 MHz  
SF 320.768 MHz  
SF 190.8052806 MHz  
WFO 5 M  
SFB 0  
LB 1.80 Hz  
GB 0  
PC 1.40

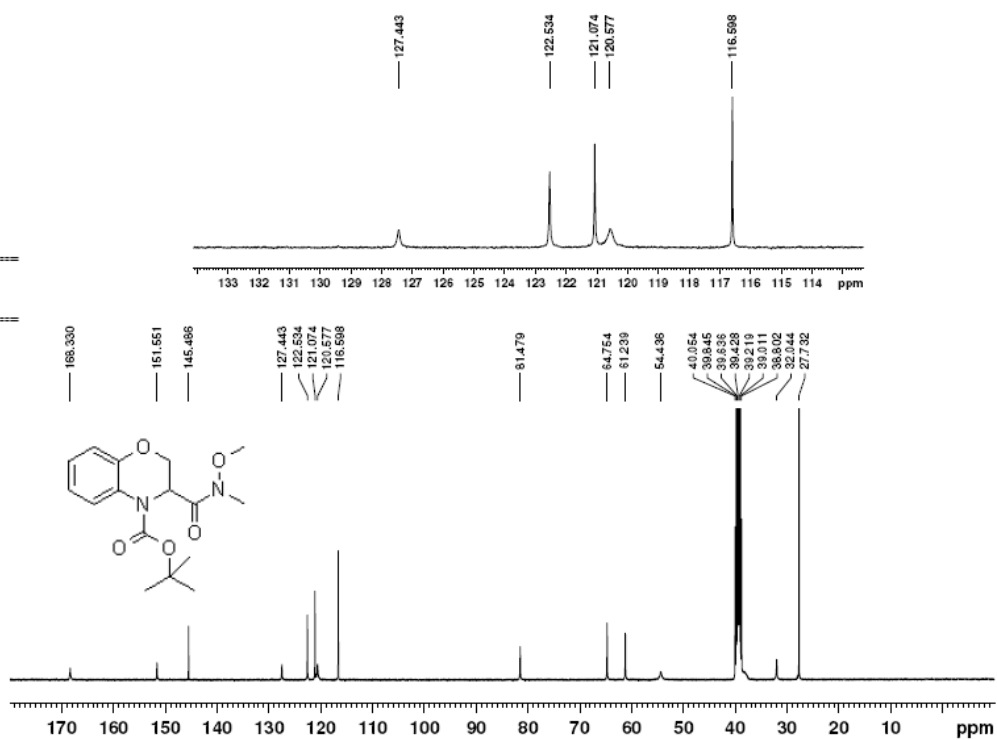

<sup>13</sup>C NMR spectrum (100MHz, DMSO-d<sub>6</sub>) of compound 14a

NAME CR211-3269-27  
EXPNO 81  
PROCNO 1  
DATE\_ 20140608  
TIME 7.50  
INSTRUM spect  
PROBHD 5 mm DUL 13C-1  
PULPROG zgpg30  
TD 65536  
SOLVENT DMSO  
NS 1595  
DS 4  
SWH 24008.461 Hz  
FIDRES 0.360799 Hz  
AQ 1.3631989 sec  
RG 233  
DQ 20.800 usec  
DE 5.53 usec  
TE 300.3 K  
CNST2 145.000000  
CNST11 1.000000  
D1 2.00000000 sec  
D10 0.00000000 sec  
TD0

===== CHANNEL f1 =====  
NUC1 13C  
P1 9.13 usec  
PL1 18.20 usec  
PL1 -1.50 dB  
PL1W 60.02969152 W  
SFO1 100.615165 MHz

===== CHANNEL f2 =====  
CPDPRG2 waltz16  
NUC2 1H  
PCPD2 93.00 usec  
PL2 -1.00 dB  
PL2W 13.83 dB  
PL2 19.80 dB  
PL2W 0.22055239 W  
PL2W 0.22055239 W  
PL2W 0.1205430 W  
SFO2 400.1911904 MHz  
SF 320.768 MHz  
SF 190.8052806 MHz  
WFO 5 M  
SFB 0  
LB 1.80 Hz  
GB 0  
PC 1.40

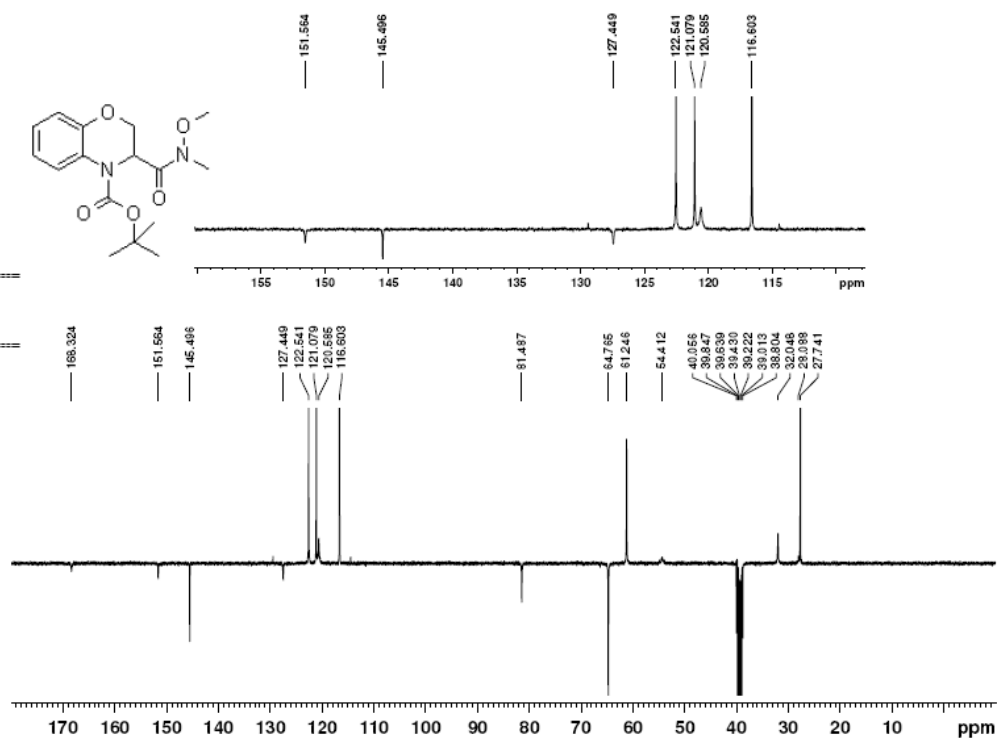

APT NMR spectrum (100MHz, DMSO-d<sub>6</sub>) of compound 14a

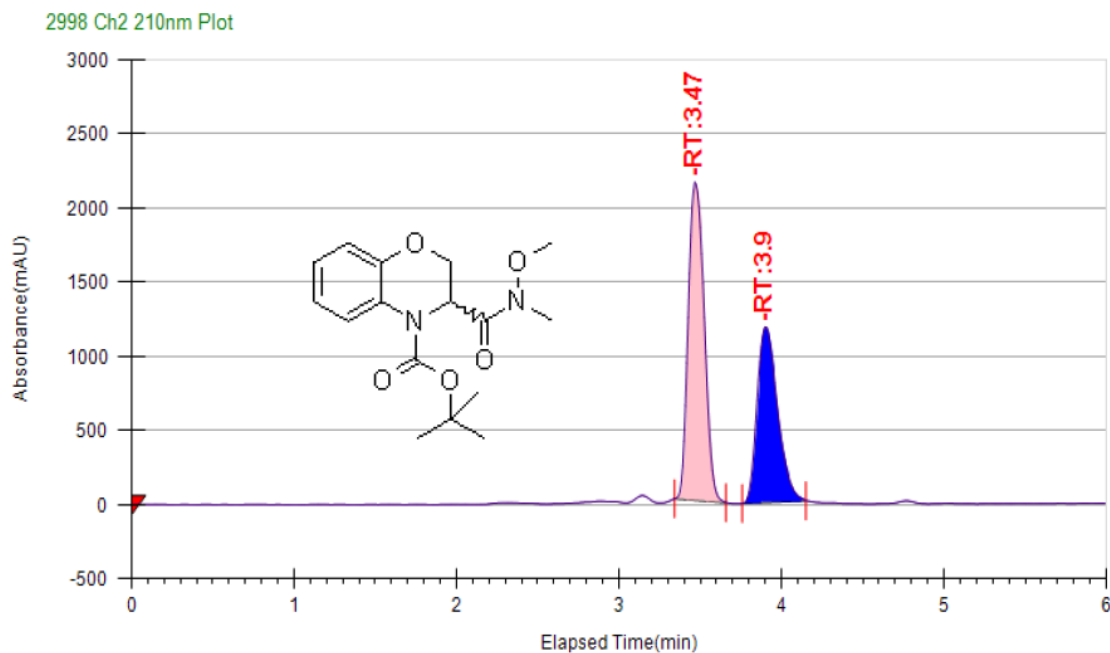

#### General Information

| Log Author | Log Date                  | Report By    | Report Date | Notes |
|------------|---------------------------|--------------|-------------|-------|
| Waters     | 10/13/2014<br>10:52:58 AM | Default User | 10/13/2014  |       |

#### Run Information

| Instrument Method | Inj. Vol. | Solvent | Column | Sample             | Well Location | Temp. | Flow | % Modifier | Pressure |
|-------------------|-----------|---------|--------|--------------------|---------------|-------|------|------------|----------|
| M-2-35            | 10        | MEOH    | IE     | CR211-8259-28(D+L) | 14B           | 35    | 2    | 35         | 120      |

#### Peak Information

| Peak No | % Area  | Area       | Ret. Time | Height    | Cap. Factor |
|---------|---------|------------|-----------|-----------|-------------|
| 1       | 58.5066 | 14287.5978 | 3.47 min  | 2147.3801 | 0           |
| 2       | 41.4934 | 10132.8952 | 3.9 min   | 1185.3585 | 0           |

**Chiral HPLC of a mixture of D- and L-isomer of compound 14a prepared by external mixing (not racemic mixture)**

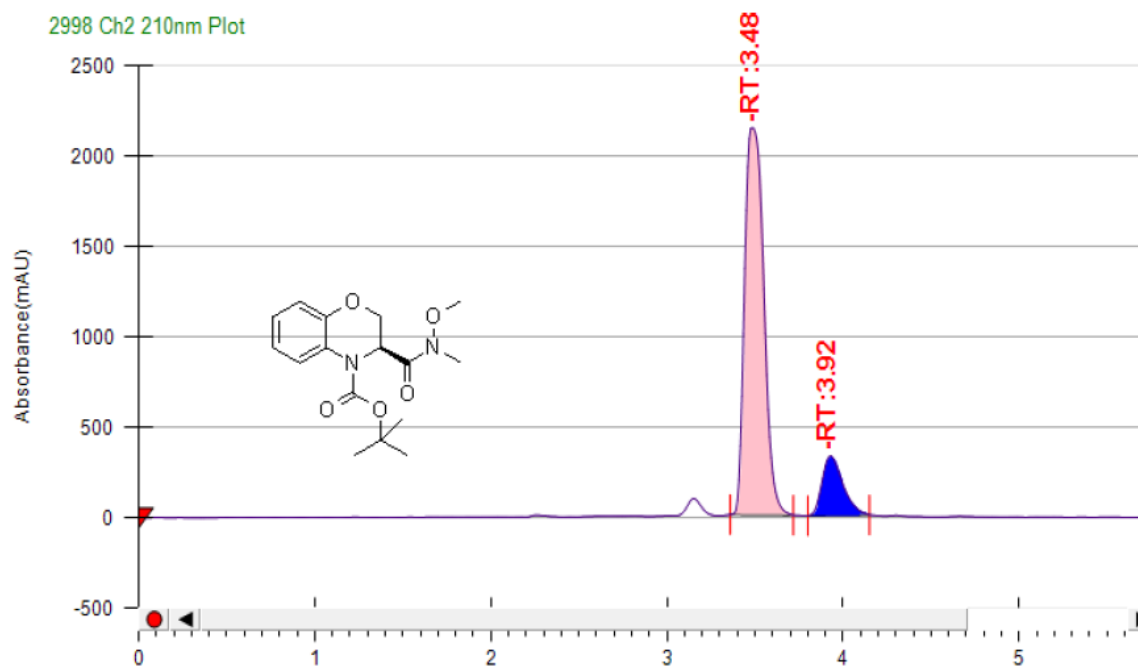

#### General Information

| Log Author | Log Date                  | Report By    | Report Date | Notes |
|------------|---------------------------|--------------|-------------|-------|
| Waters     | 10/13/2014<br>11:12:24 AM | Default User | 10/13/2014  |       |

#### Run Information

| Instrument Method | Inj. Vol. | Solvent | Column | Sample         | Well Location | Temp. | Flow | % Modifier | Pressure |
|-------------------|-----------|---------|--------|----------------|---------------|-------|------|------------|----------|
| M-2-35            | 10        | MEOH    | IE     | CR211-8259-28L | 15D           | 35    | 2    | 35         | 120      |

#### Peak Information

| Peak No | % Area  | Area       | Ret. Time | Height    | Cap. Factor |
|---------|---------|------------|-----------|-----------|-------------|
| 1       | 85.6812 | 15834.2896 | 3.48 min  | 2139.2609 | 0           |
| 2       | 14.3188 | 2646.1799  | 3.92 min  | 328.4731  | 0           |

### Chiral HPLC of L-isomer 14a

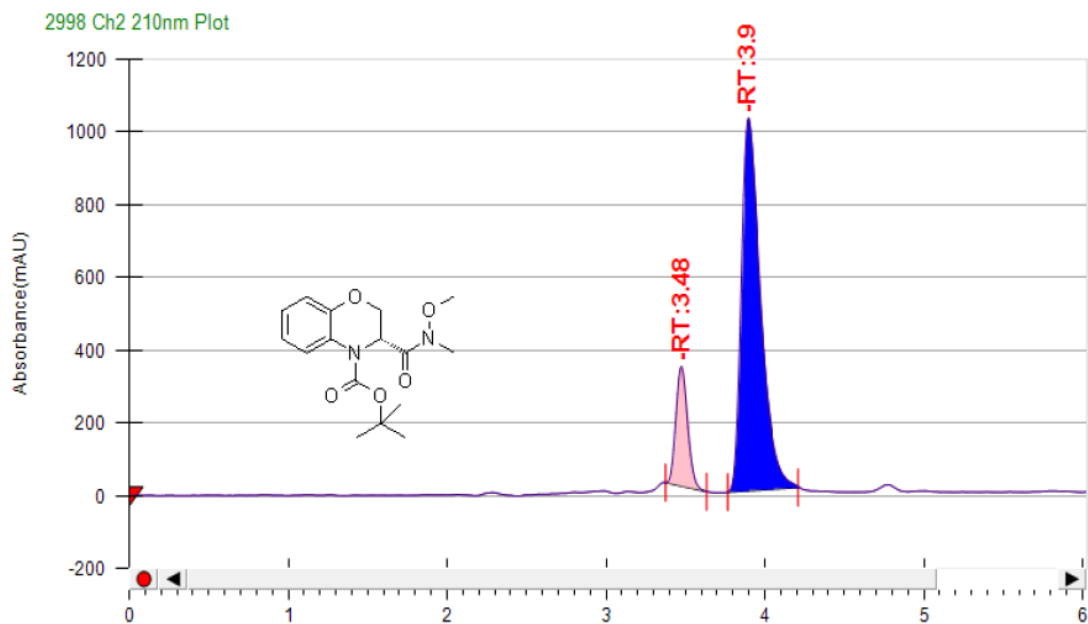

#### General Information

| Log Author | Log Date                  | Report By    | Report Date | Notes |
|------------|---------------------------|--------------|-------------|-------|
| Waters     | 10/13/2014<br>11:02:41 AM | Default User | 10/13/2014  |       |

#### Run Information

| Instrument Method | Inj. Vol. | Solvent | Column | Sample             | Well Location | Temp. | Flow | % Modifier | Pressure |
|-------------------|-----------|---------|--------|--------------------|---------------|-------|------|------------|----------|
| M-2-35            | 10        | MEOH    | IE     | CR211-8259-<br>28D | 14D           | 35    | 2    | 35         | 120      |

#### Peak Information

| Peak No | % Area  | Area      | Ret. Time | Height    | Cap. Factor |
|---------|---------|-----------|-----------|-----------|-------------|
| 1       | 16.1967 | 1632.3176 | 3.48 min  | 329.2397  | 0           |
| 2       | 83.8033 | 8445.7415 | 3.9 min   | 1025.4338 | 0           |

### Chiral HPLC of D-isomer 14a

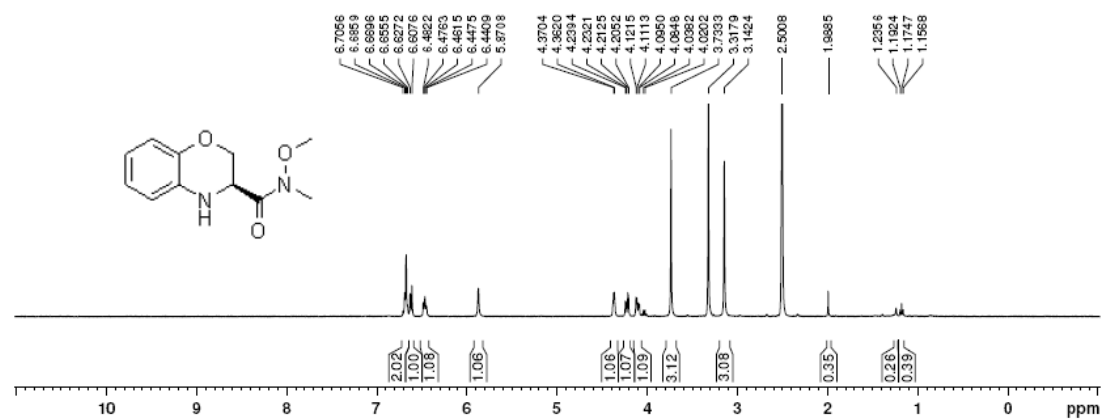

**<sup>1</sup>H NMR spectrum (400MHz, DMSO d<sub>6</sub>) of compound 18a**

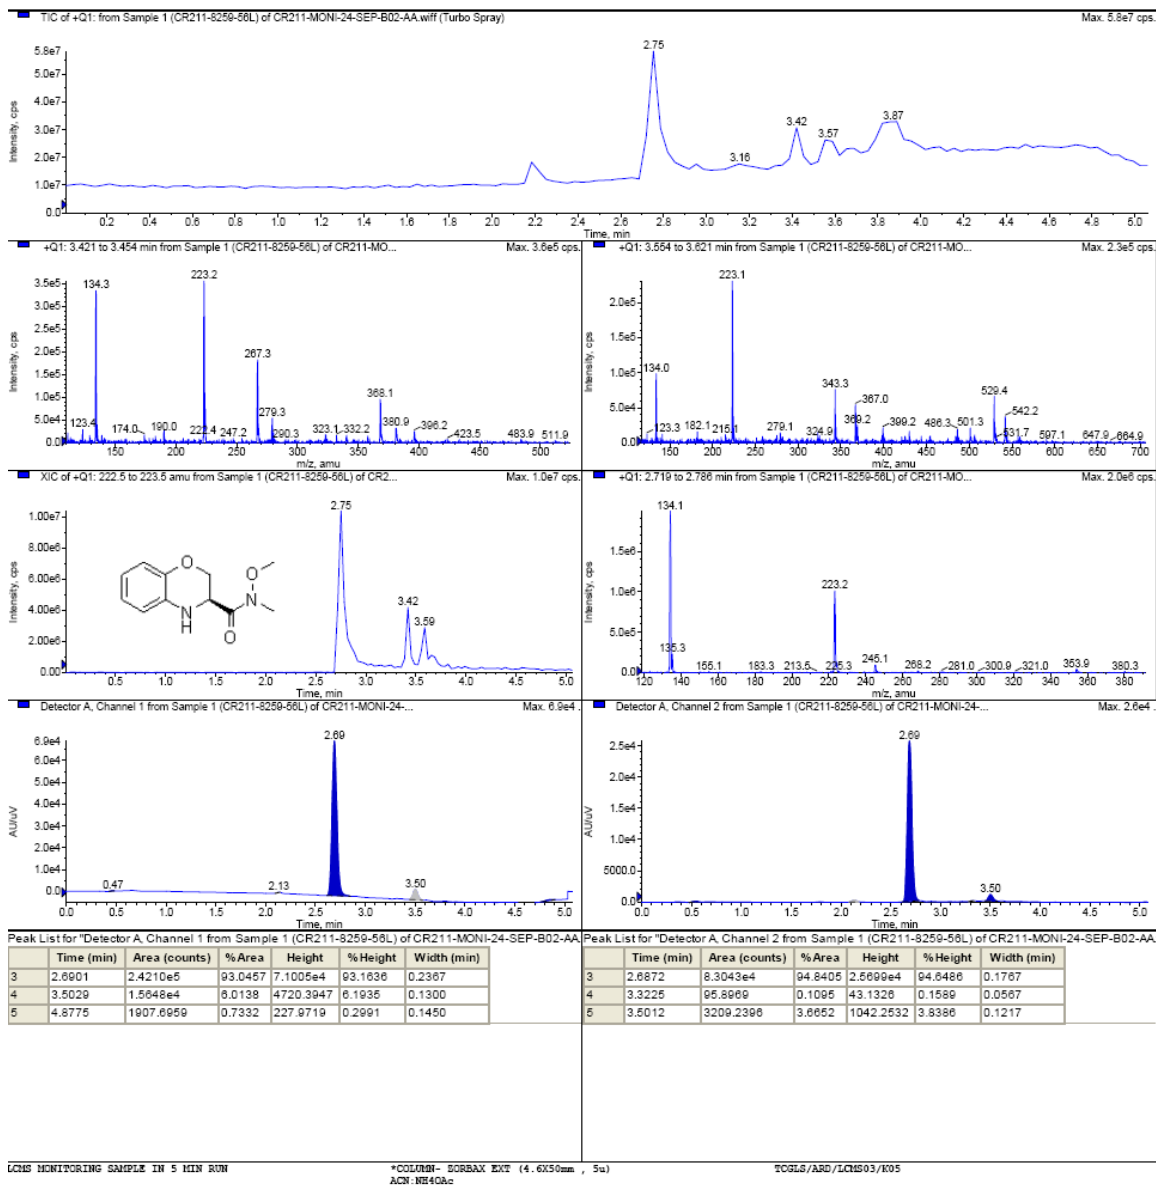

Channel 1 at wavelength 220 nm  
Channel 2 at wavelength 260 nm

Analysed By

Checked By

## LCMS spectrum of compound 18a

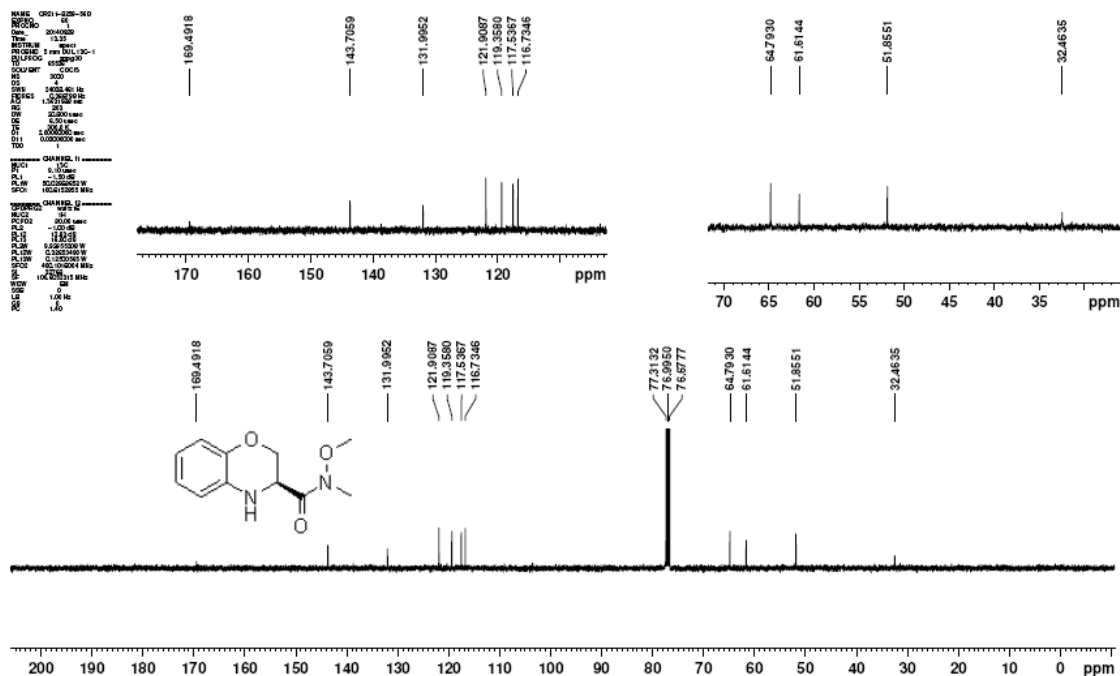

**<sup>13</sup>C NMR spectrum (100MHz, CDCl<sub>3</sub>) of compound 18a**

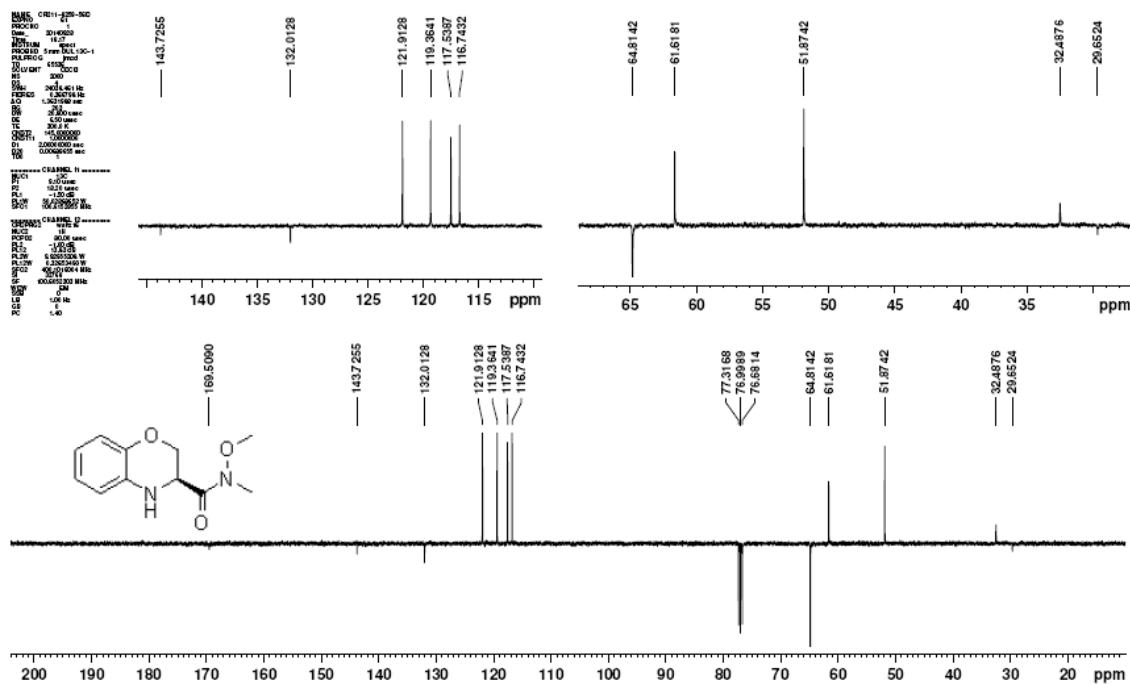

**APT NMR spectrum (100MHz, CDCl<sub>3</sub>) of compound 18a**

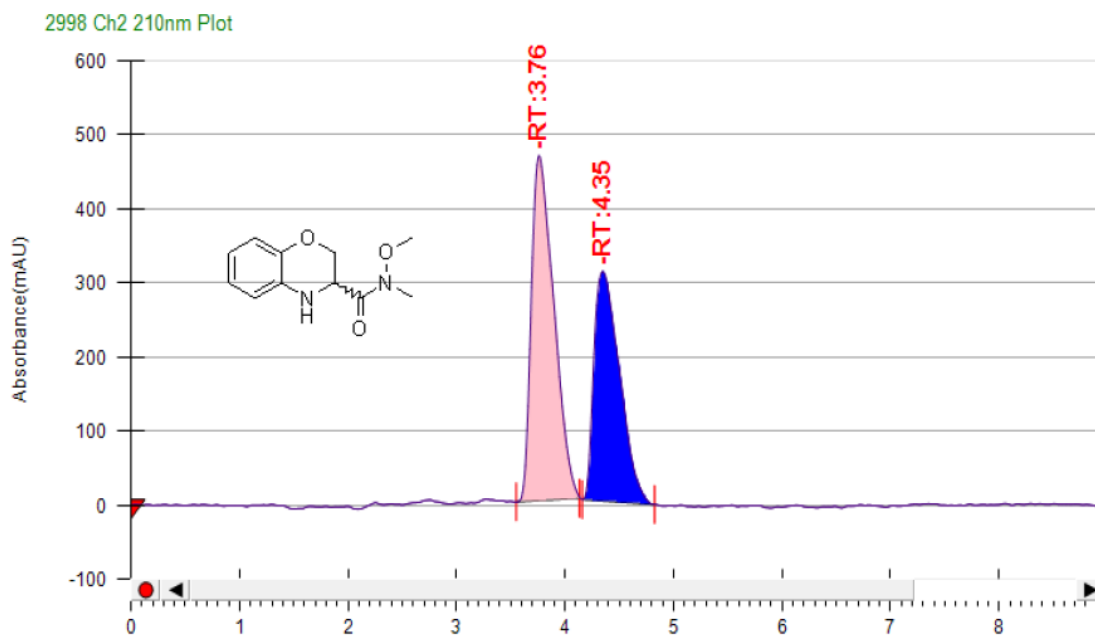

#### General Information

| Log Author | Log Date                | Report By    | Report Date | Notes |
|------------|-------------------------|--------------|-------------|-------|
| Waters     | 10/8/2014<br>4:45:50 PM | Default User | 10/8/2014   |       |

#### Run Information

| Instrument Method | Inj. Vol. | Solvent | Column      | Sample            | Well Location | Temp. | Flow | % Modifier | Pressure |
|-------------------|-----------|---------|-------------|-------------------|---------------|-------|------|------------|----------|
| M-2-25            | 10        | MEOH    | CELLULOSE-1 | CR211-8259-70-RAC | 12C           | 35.2  | 2    | 25         | 80       |

#### Peak Information

| Peak No | % Area  | Area      | Ret. Time | Height   | Cap. Factor |
|---------|---------|-----------|-----------|----------|-------------|
| 1       | 56.8055 | 6612.1758 | 3.76 min  | 465.6584 | 0           |
| 2       | 43.1945 | 5027.8524 | 4.35 min  | 309.8057 | 0           |

**Chiral HPLC of manual mixture of (D+L) isomers 18a**



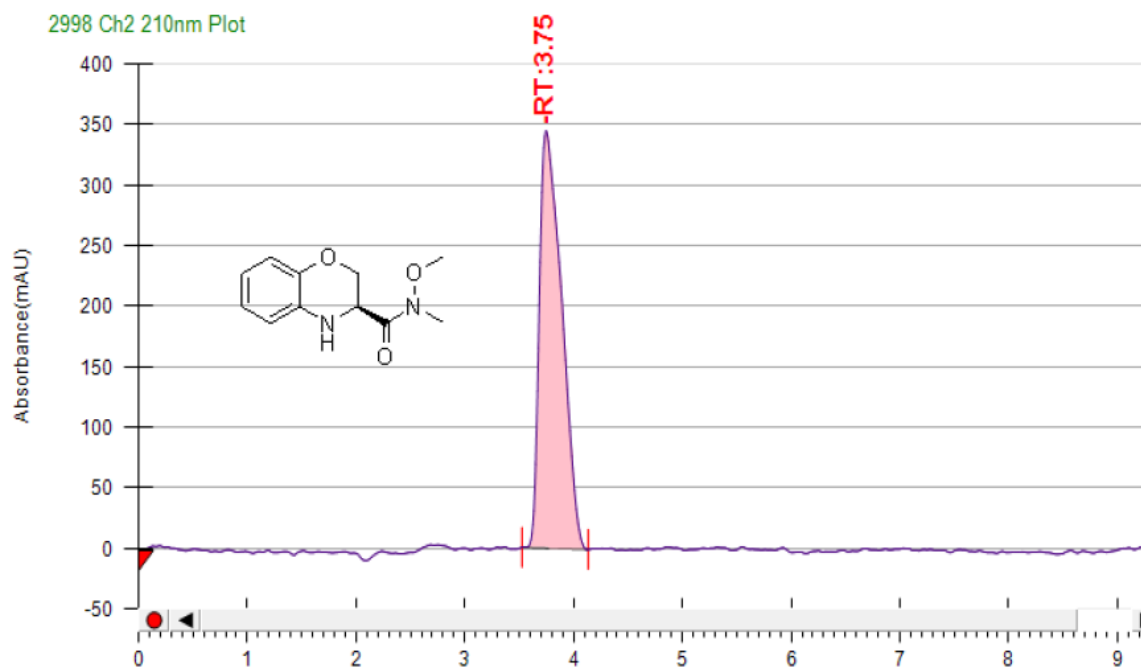

### General Information

| Log Author | Log Date                | Report By    | Report Date | Notes |
|------------|-------------------------|--------------|-------------|-------|
| Waters     | 10/8/2014<br>5:11:14 PM | Default User | 10/8/2014   |       |

### Run Information

| Instrument Method | Inj. Vol. | Solvent | Column      | Sample         | Well Location | Temp. | Flow | % Modifier | Pressure |
|-------------------|-----------|---------|-------------|----------------|---------------|-------|------|------------|----------|
| M-2-25            | 10        | MEOH    | CELLULOSE-1 | CR211-8259-70L | 14C           | 35.1  | 2    | 25         | 80       |

### Peak Information

| Peak No | % Area | Area      | Ret. Time | Height   | Cap. Factor |
|---------|--------|-----------|-----------|----------|-------------|
| 1       | 100    | 4831.0649 | 3.75 min  | 344.2187 | 3749        |

## Chiral HPLC of L-isomer 18a

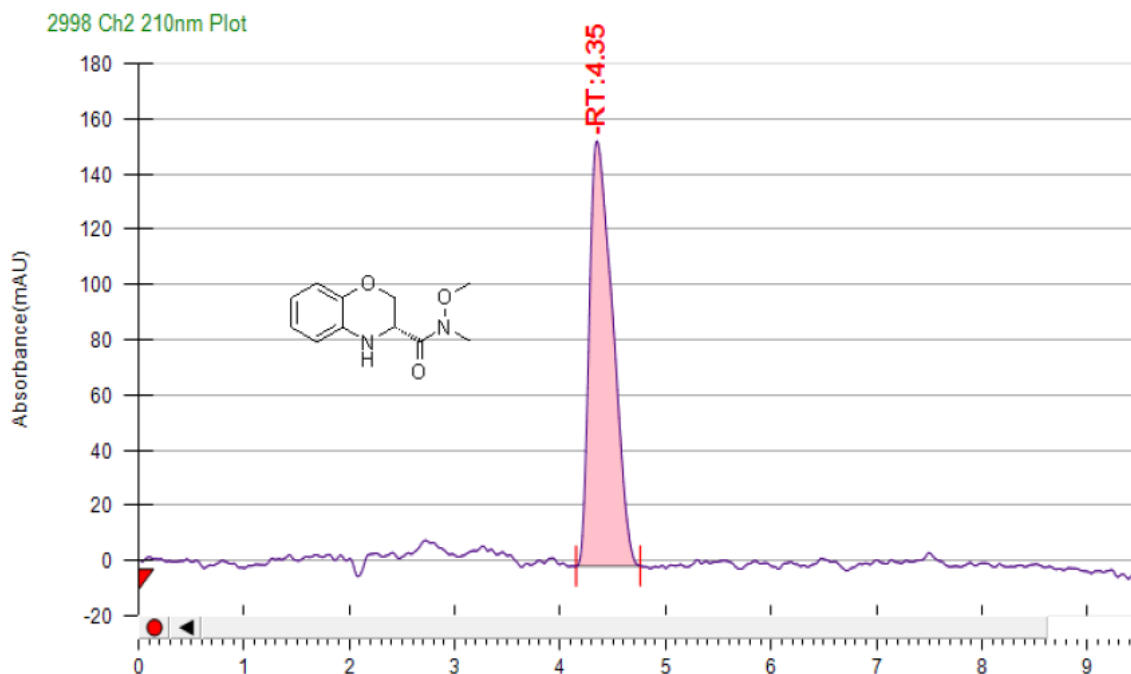

### General Information

| Log Author | Log Date                | Report By    | Report Date | Notes |
|------------|-------------------------|--------------|-------------|-------|
| Waters     | 10/8/2014<br>4:58:32 PM | Default User | 10/8/2014   |       |

### Run Information

| Instrument Method | Inj. Vol. | Solvent | Column      | Sample         | Well Location | Temp. | Flow | % Modifier | Pressure |
|-------------------|-----------|---------|-------------|----------------|---------------|-------|------|------------|----------|
| M-2-25            | 10        | MEOH    | CELLULOSE-1 | CR211-8259-70D | 13C           | 34.8  | 2    | 25         | 80       |

### Peak Information

| Peak No | % Area | Area      | Ret. Time | Height   | Cap. Factor |
|---------|--------|-----------|-----------|----------|-------------|
| 1       | 100    | 2324.0992 | 4.35 min  | 153.8755 | 0           |

## Chiral HPLC of D-isomer 18a

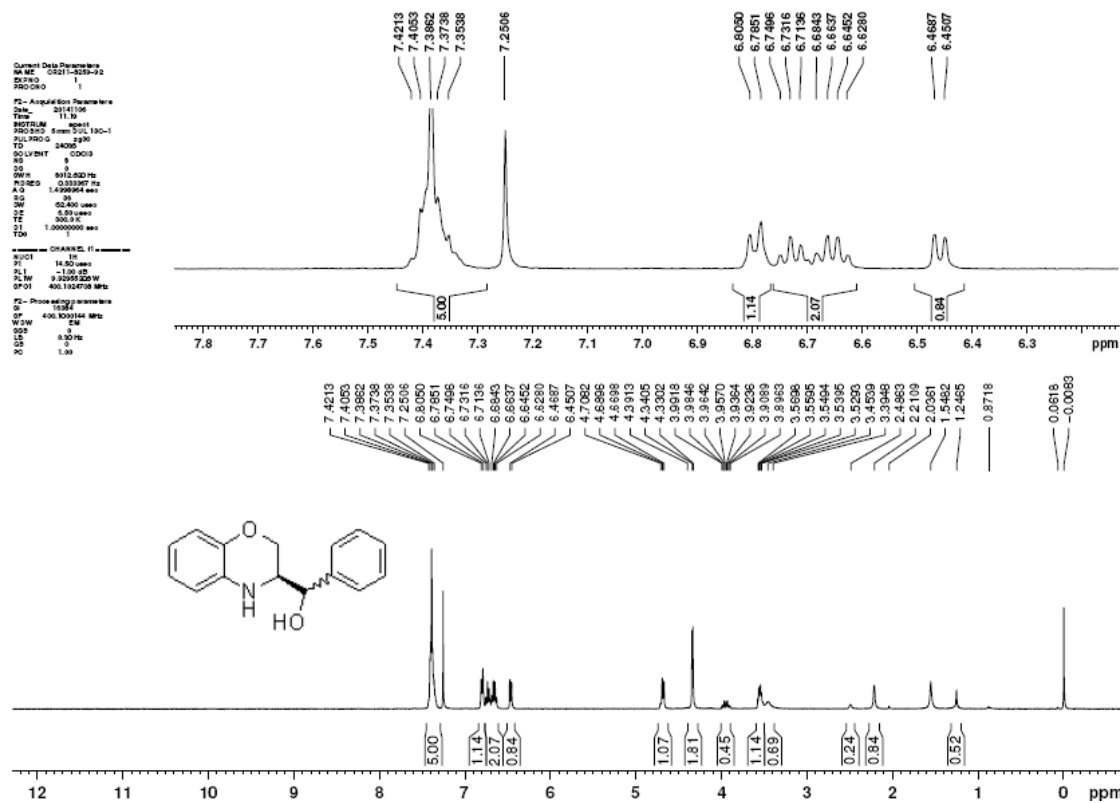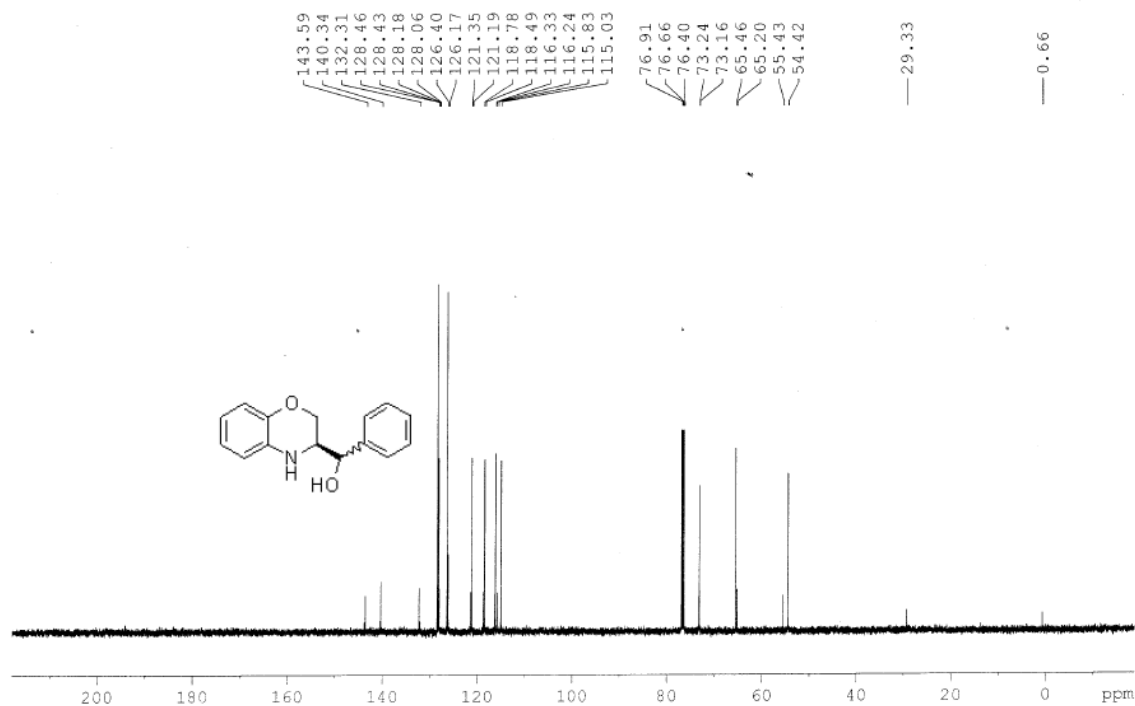

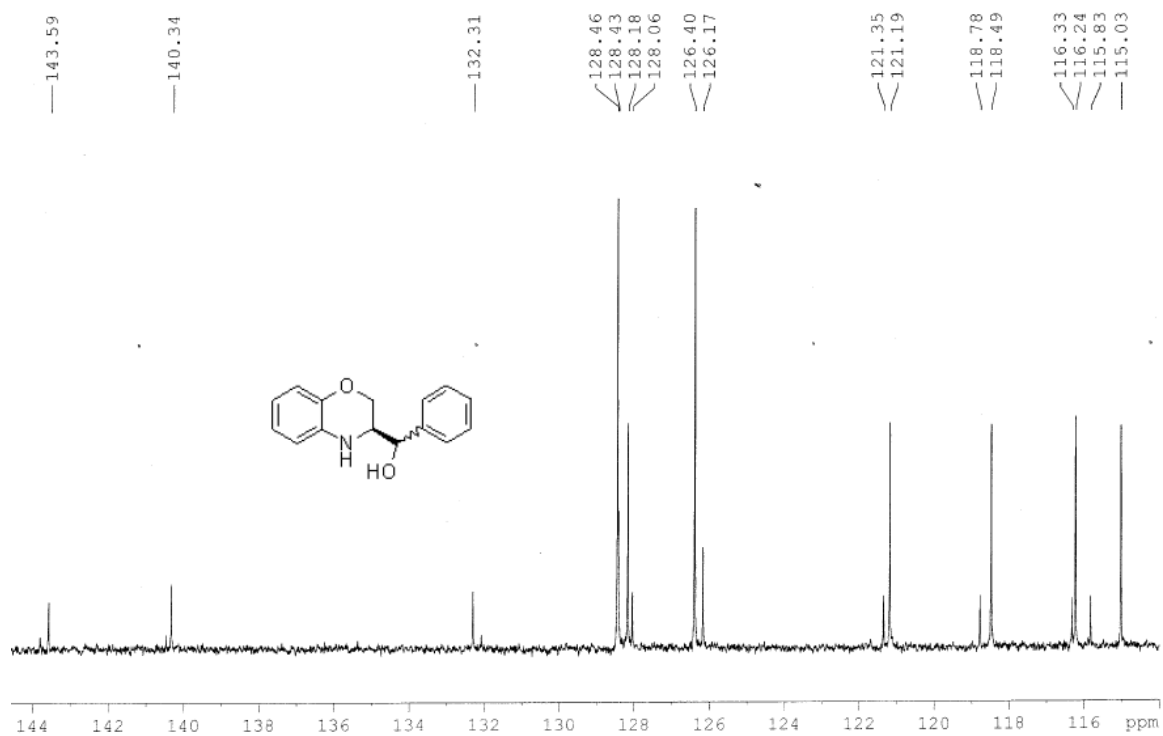

Expansion of  $^{13}\text{C}$  NMR spectrum (100MHz,  $\text{CDCl}_3$ ) of compound 20a

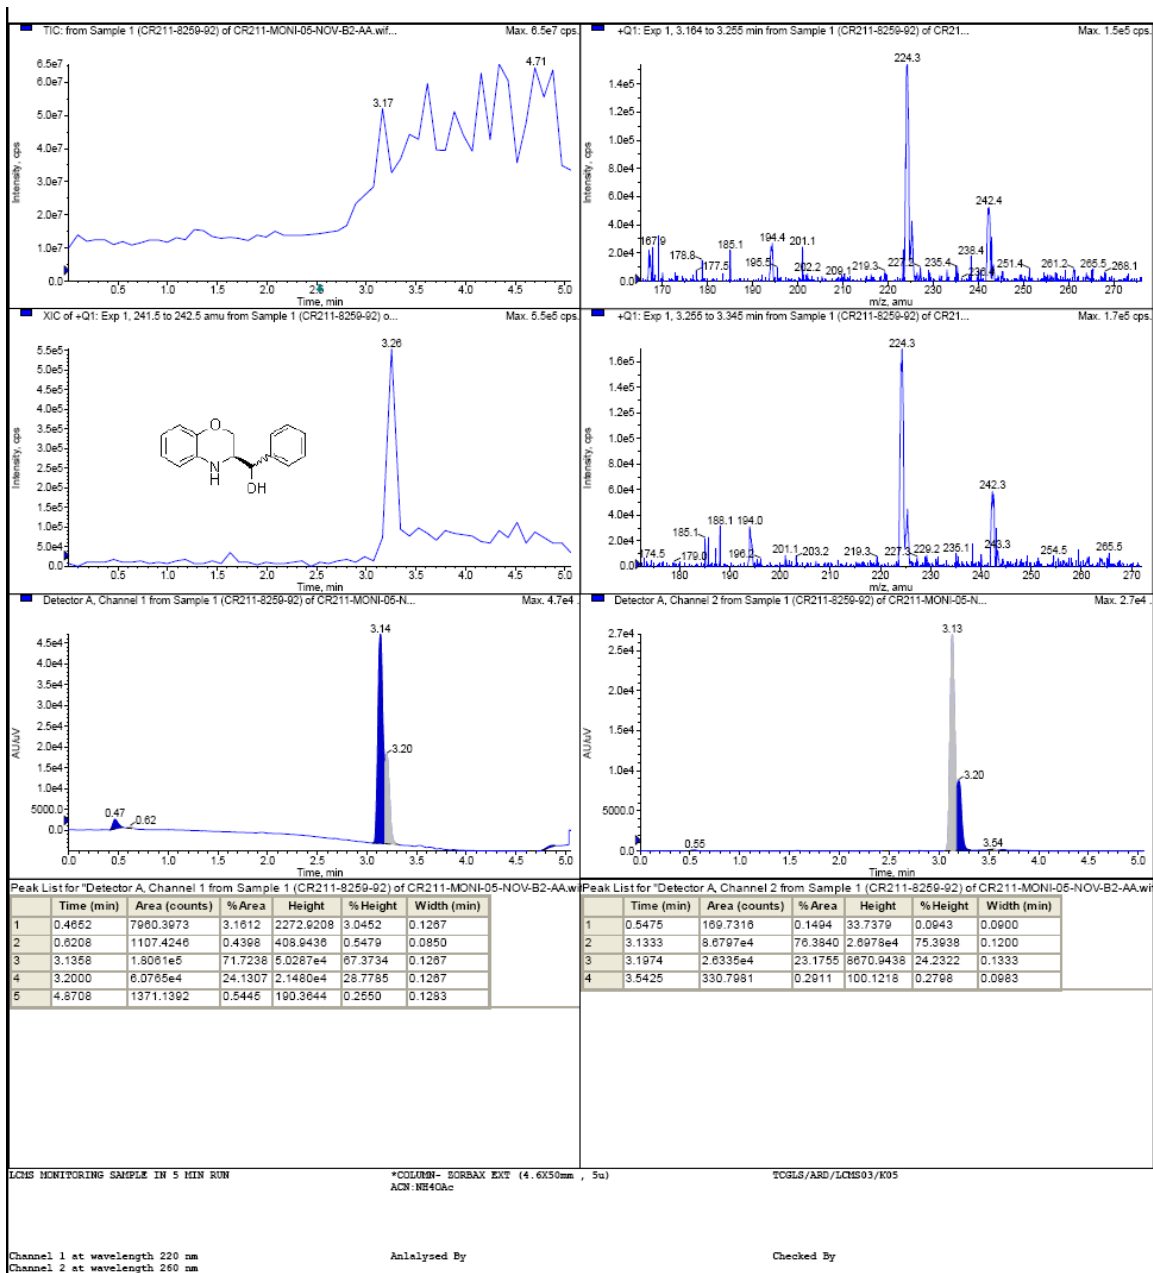

**LCMS spectrum of compound 20a**

C:\LabSolutions\LCsolution\TCGLS-ARD-HPLC09-K19\HPLC-2014\NOV-14\NOV-14\DATA\06111410 F.lcd

Method File Name : NPR150-AA\_50\_1.lcm  
Data File Name : 06111410 F.lcd  
Acquired by : Sushovan Ghatak  
Data Acquired : 11/6/2014 2:36:33 PM  
Data Processed : 11/6/2014 3:32:54 PM  
Ref.No : SG/06.11.14/275

Sample Name : CR211-8259-92  
Tray# : 1  
Vial # : 13  
Inj Volume : 2 uL  
Column : GEMINI NX C-18 (100x4.6mm)5u  
Mobile phase-A : ACN  
Mobile phase-C : 10mM NH4OAC in water  
Diluent : ACN

### <Chromatogram>

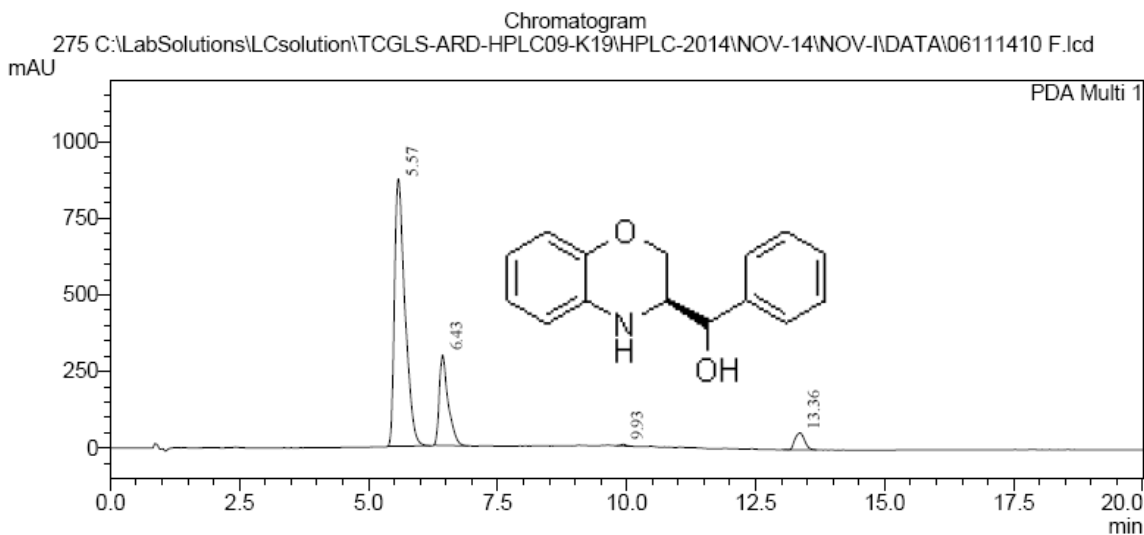

PeakTable

PDA Ch1 215nm 4nm

| Peak# | Ret. Time | Area     | Area % |
|-------|-----------|----------|--------|
| 1     | 5.57      | 12373636 | 74.26  |
| 2     | 6.43      | 3543196  | 21.26  |
| 3     | 9.93      | 39181    | 0.24   |
| 4     | 13.36     | 706740   | 4.24   |
| Total |           | 16662753 | 100.00 |

**HPLC Purity of compound 20a**

Seq Line-> 8  
 Location : Vial 27  
 Acq Operator : KONDABABU  
 Inj. No. : 1  
 Injection Date: 10/28/2014  
 Inj. Vol. : 5 µl  
 Acq. Method : C:\Chem32\1\DATA\OCT-14\281014 2014-10-28 09-44-14\C.M  
 Analysis Method : C:\CHEM32\1\METHODS\100-ETOH.M  
 Last Changed : Tue, 28. Oct. 2014, 01:51:05 pm  
 (modified after loading)  
 Sample ID : CR211-8259-85-Racemic

Column name:YMC Amylose-C(4.6x250mm) 5µ ,  
 ARD/K/7787  
 Mobile Phase : EtOH:100  
 Flow rate : 0.5 ml/min ,  
 Slubility : MeOH

->  
 Ref : KD/28.10.14/1138

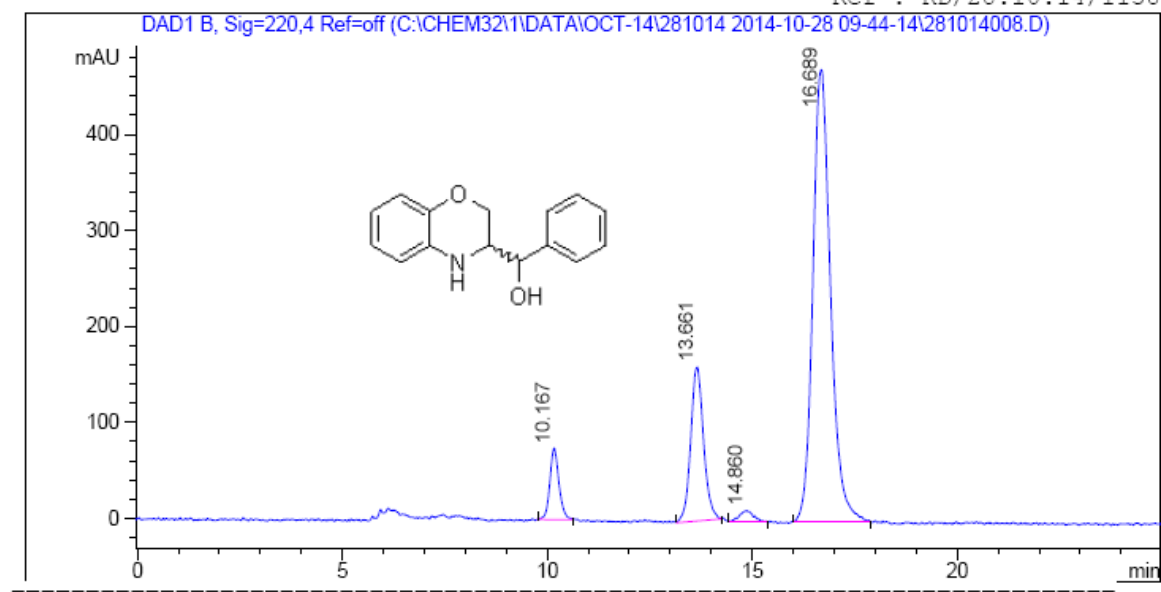

Signal 1: DAD1 B, Sig=220,4 Ref=off

| Peak # | RT [min] | Area     | Area % |
|--------|----------|----------|--------|
| 1      | 10.17    | 1153.65  | 6.05   |
| 2      | 13.66    | 3497.58  | 18.35  |
| 3      | 14.86    | 278.25   | 1.46   |
| 4      | 16.69    | 14127.36 | 74.13  |

**Chiral HPLC of epimeric mixture of (D+L) isomers of 20a**

Acq Operator : KONDABABU  
 Injection Date: 10/28/2014  
 Acq. Method : C:\Chem32\1\DATA\OCT-14\281014 2014-10-28 09-44-14\C.M  
 Analysis Method : C:\CHEM32\1\METHODS\100-ETOH.M  
 Last Changed : Tue, 28. Oct. 2014, 01:51:05 pm  
 (modified after loading)  
 Sample ID :CR211-8259-85L

Column name:YMC Amylose-C(4.6x250mm) 5µ ,  
 ARD/K/7787

Mobile Phase : EtOH:100  
 Flow rate : 0.5 ml/min ,  
 Slubility : MeOH

Ref : KD/28.10.14/1139

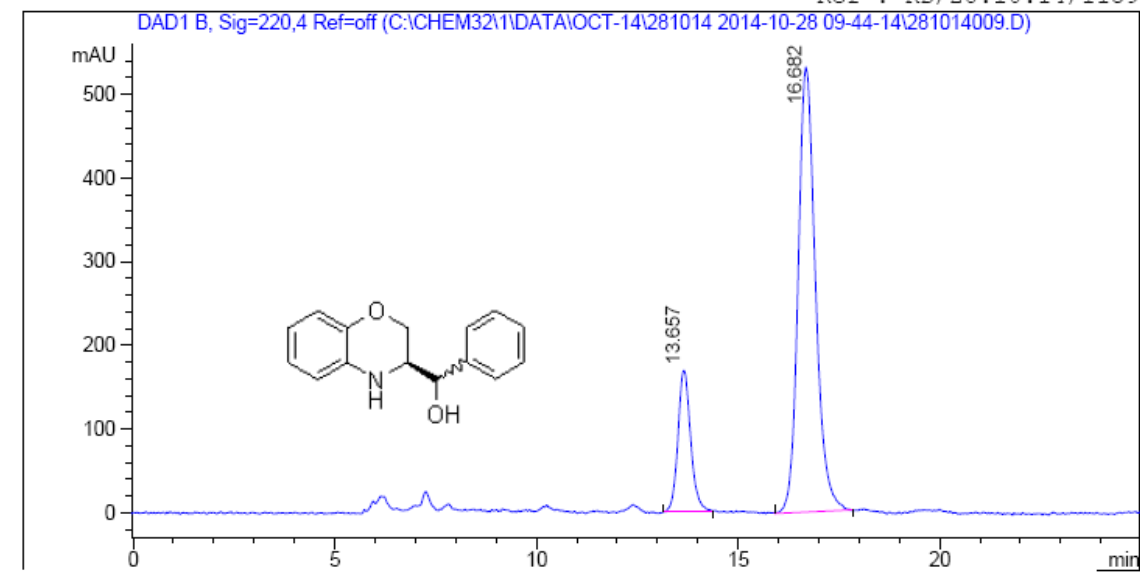

Signal 1: DAD1 B, Sig=220,4 Ref=off

| Peak # | RT [min] | Area     | Area % |
|--------|----------|----------|--------|
| 1      | 13.66    | 3671.87  | 18.79  |
| 2      | 16.68    | 15871.83 | 81.21  |

**Chiral HPLC of L-isomer 20a**



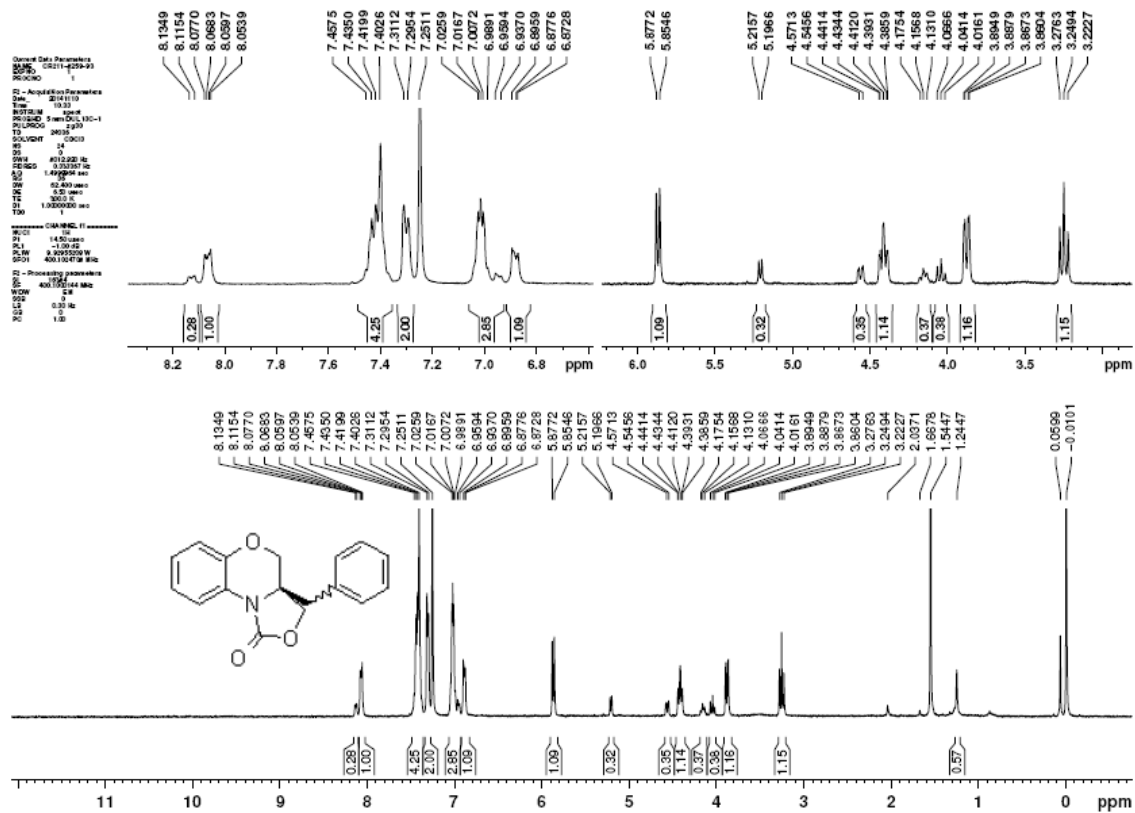

<sup>1</sup>H NMR spectrum (400MHz, CDCl<sub>3</sub>) of compound 21a

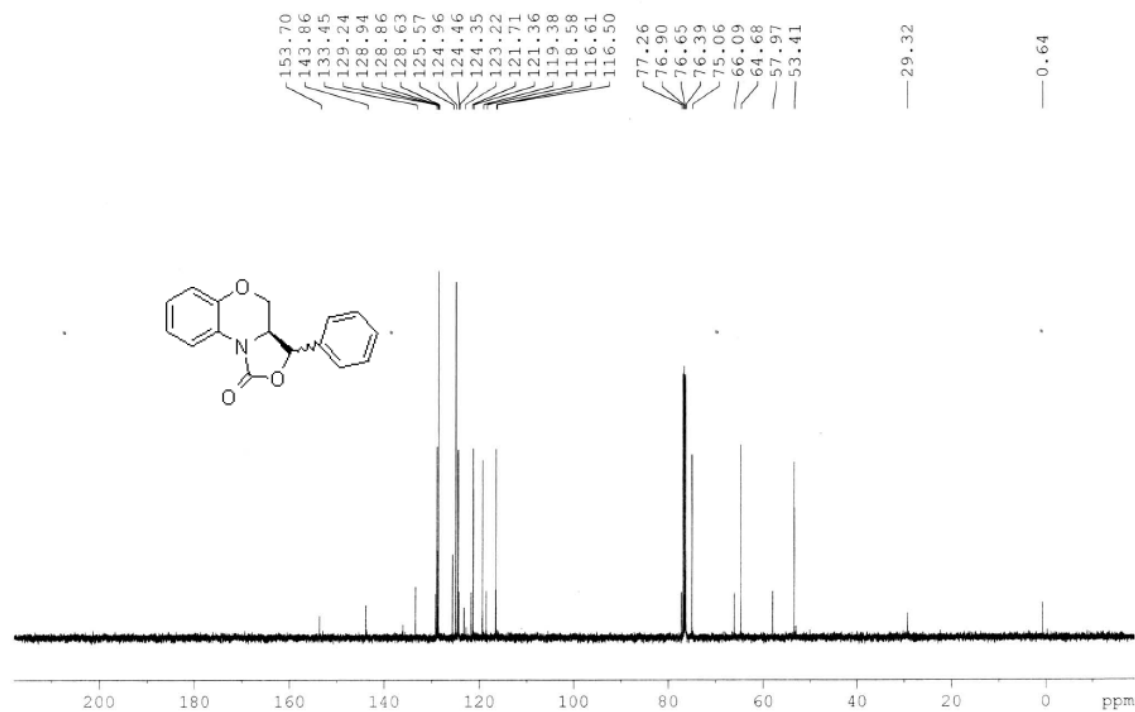

<sup>13</sup>C NMR spectrum (100MHz, CDCl<sub>3</sub>) of compound 21a

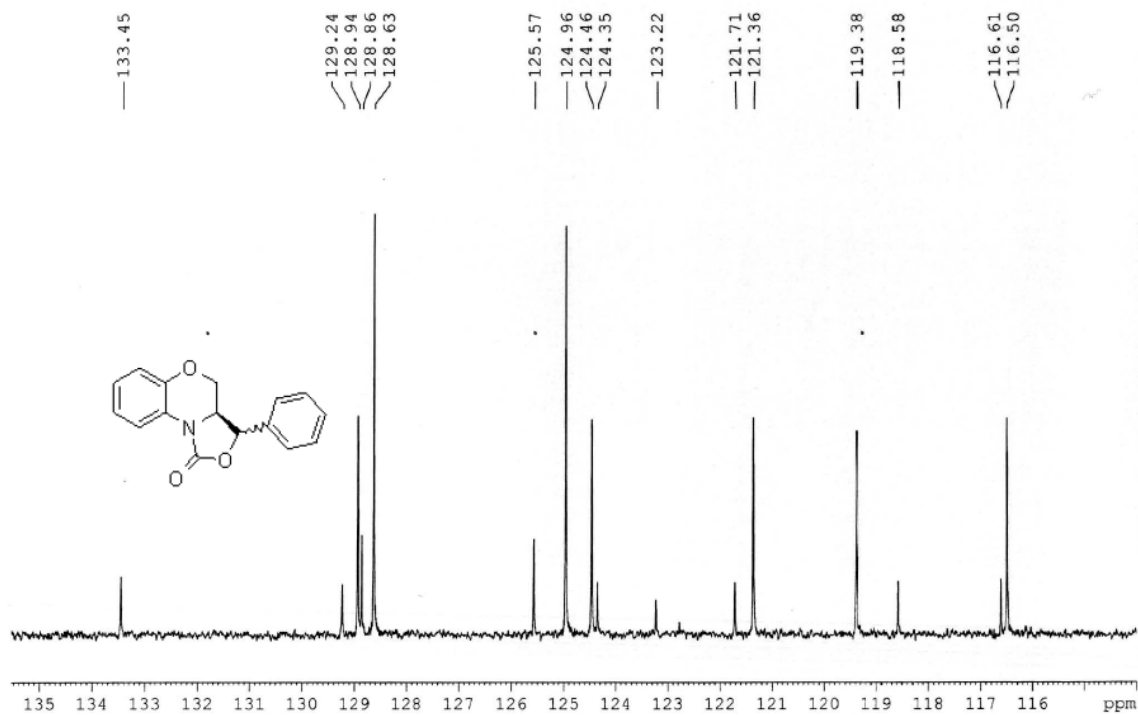

Expansion of <sup>13</sup>C NMR spectrum (100MHz, CDCl<sub>3</sub>) of compound 21a

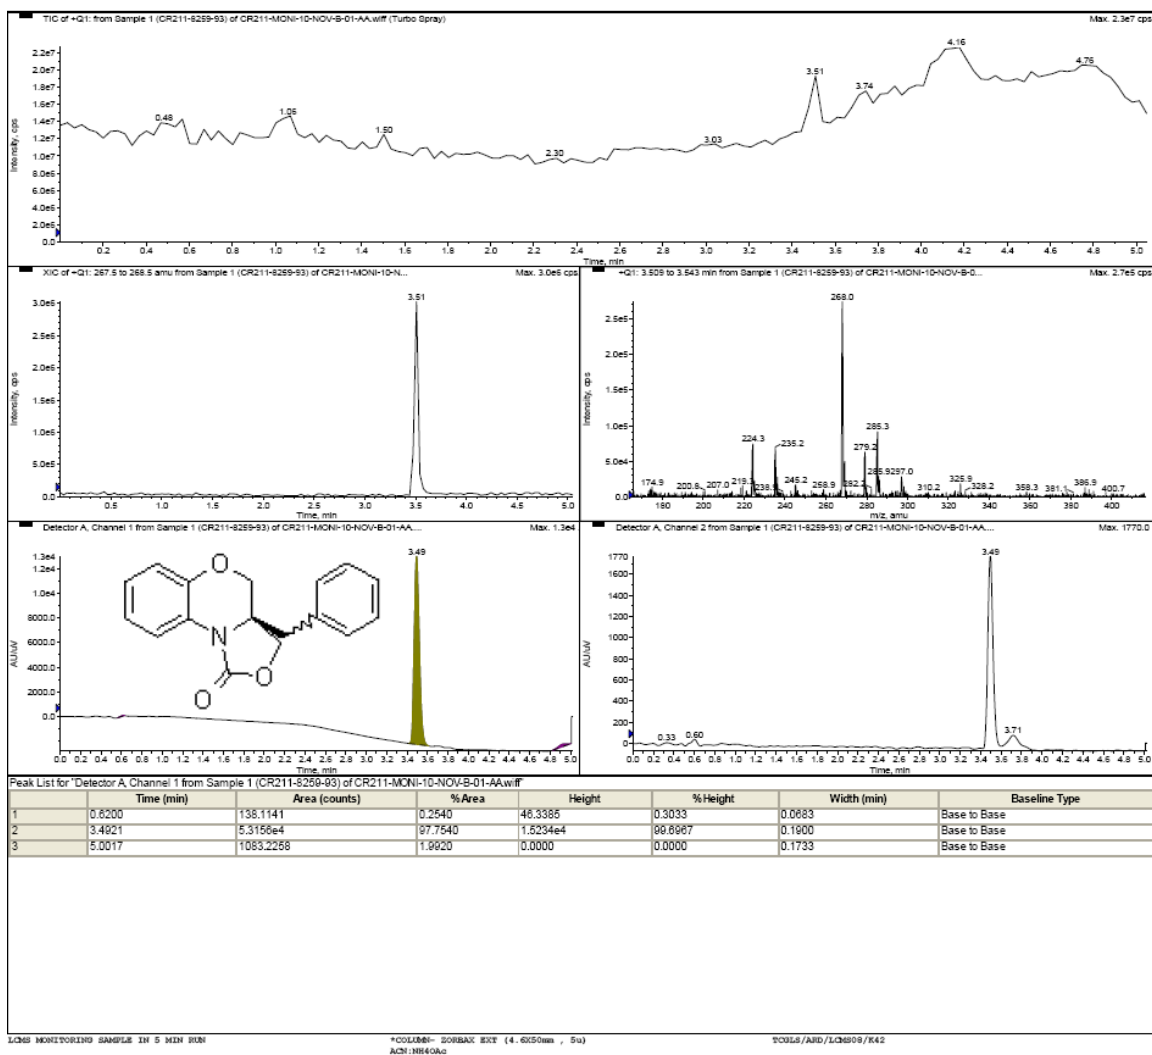

Channel 1 at wavelength 220 nm  
Channel 2 at wavelength 260 nm

Analysed By

Checked By

## LCMS spectrum of compound 21a

Column Name: Poroshell 120 EC-C-18 (100\*4.6 mm) 2.7μ, Diluent: MEOH  
 Mobile Phase-A1: 0.05% TFA in WATER, -B1: ACN, Flow: 1.0 mL/min  
 Injection Date : Mon, 10. Nov. 2014 11:45:46 Location : Vial 82  
 Sample Name : CR211-8259-93 Inj. No. -> 1  
 Acq Operator : PRIYA Inj. Vol. : 12 μl  
  
 Analysis Method : C:\CHEM32\1\METHODS\POLAR.M  
 Last Changed : Mon, 10. Nov. 2014, 10:34:28 am  
 (modified after loading)  
  
 Acq. Method : C:\CHEM32\1\DATA\2014\NOV-14\101114A 2014-11-10 09-30-05\POLAR.M

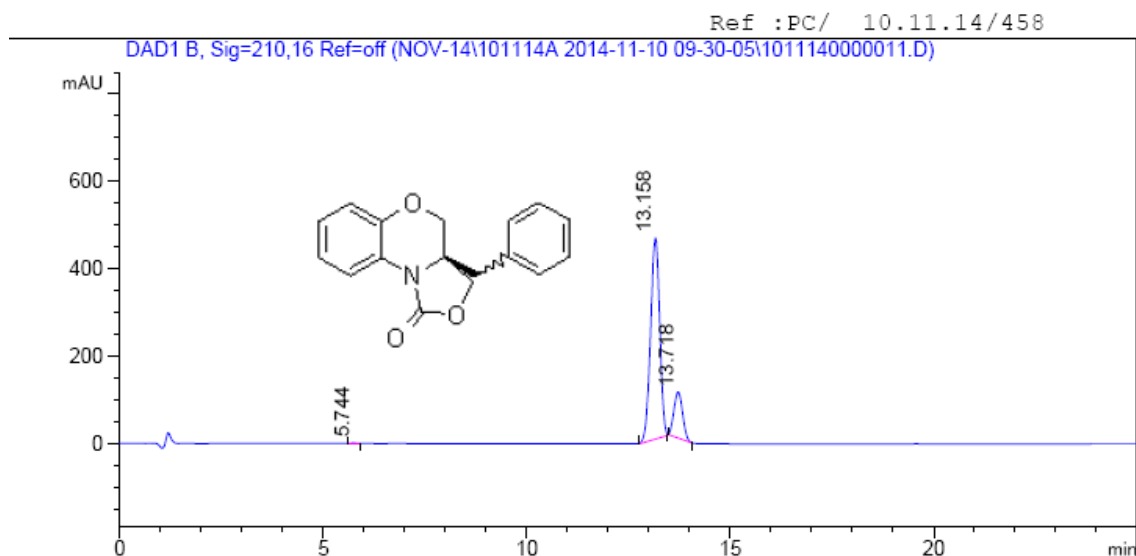

=====

Signal 1 : DAD1 B, Sig=210,16 Ref=off

| Peak # | RT [min] | Area    | Area % |
|--------|----------|---------|--------|
| 1      | 5.74     | 8.48    | 0.10   |
| 2      | 13.16    | 7209.08 | 82.14  |
| 3      | 13.72    | 1558.91 | 17.76  |

=====

\*\*\* End of Report \*\*\*

**HPLC Purity of compound 21a**

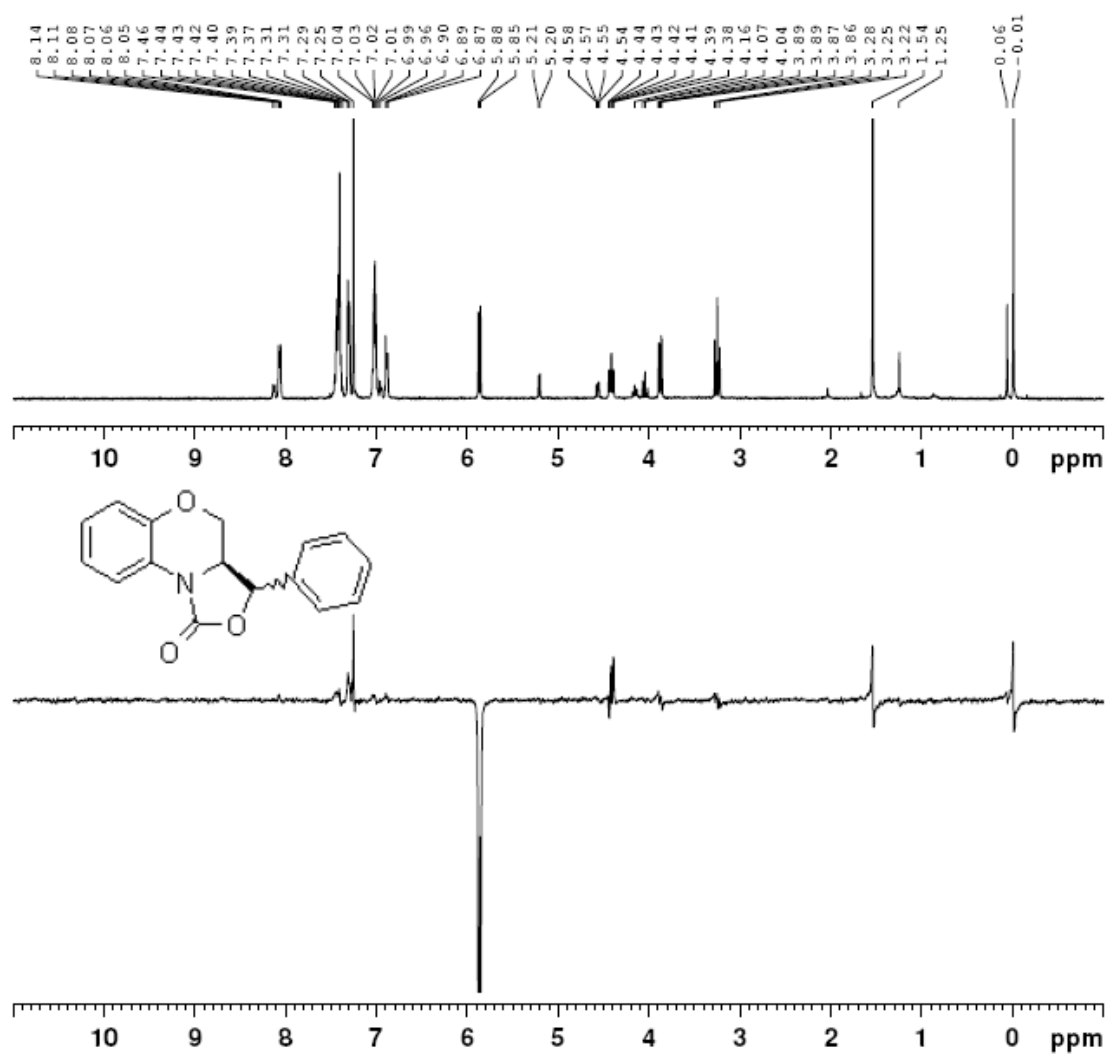

NOE1 of compound 21a

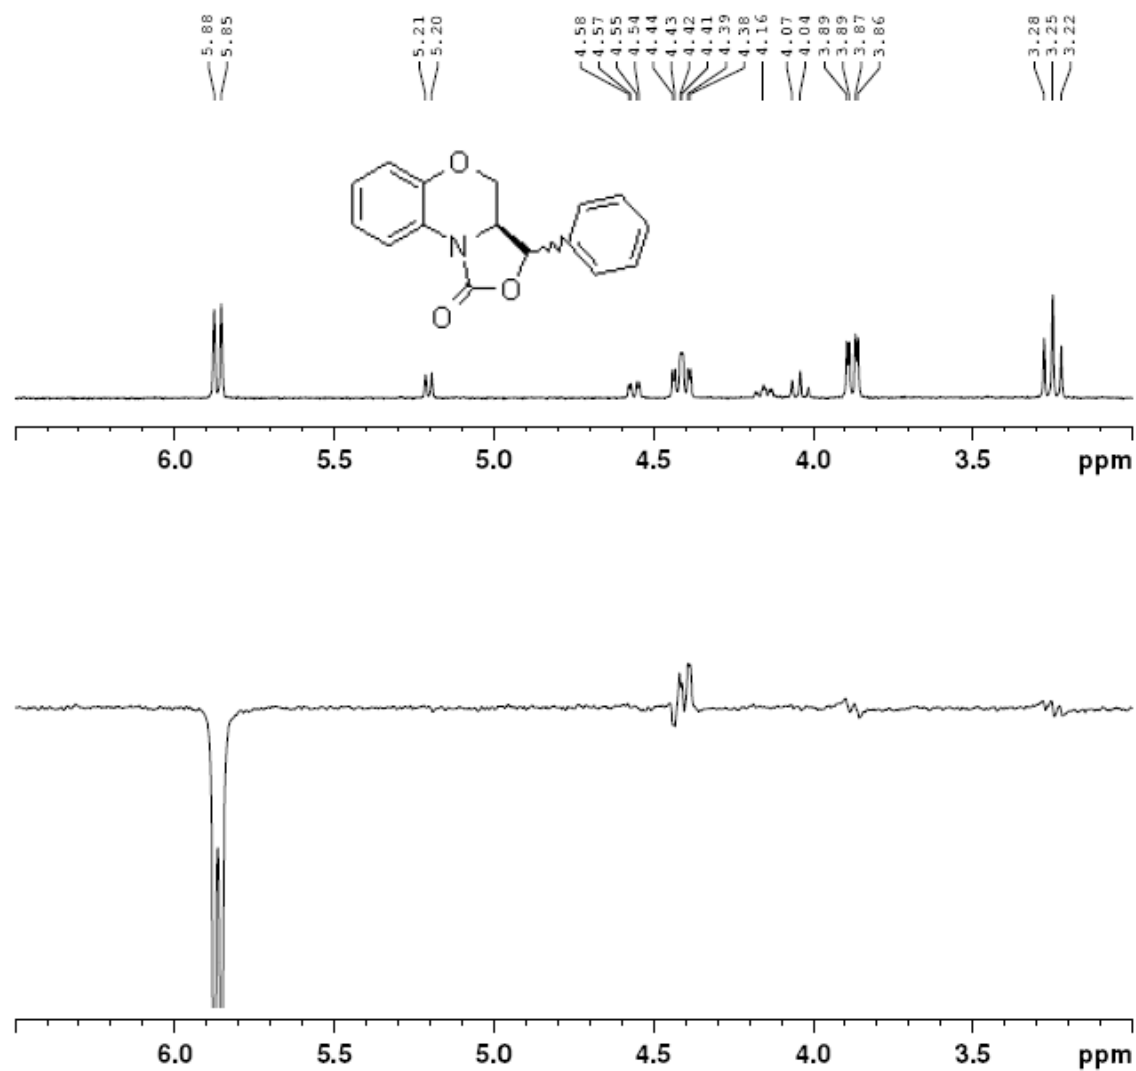

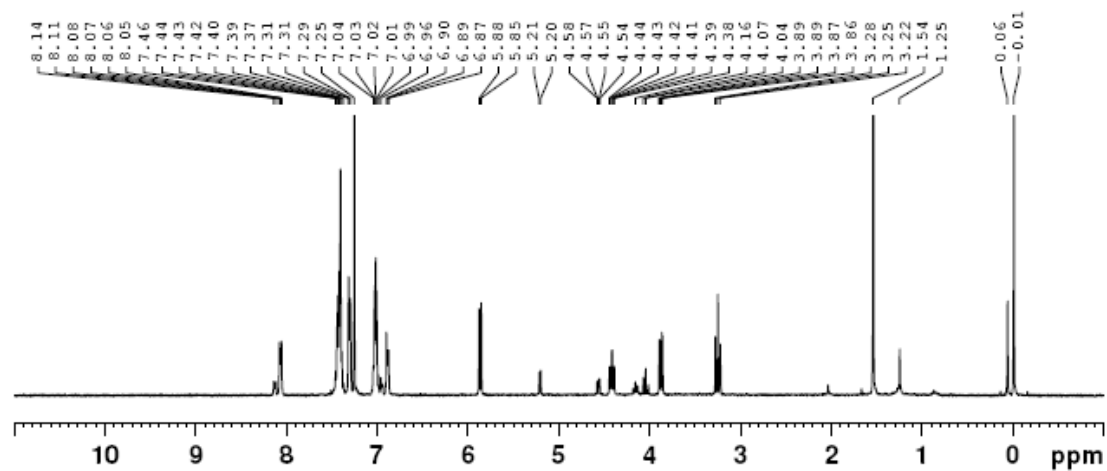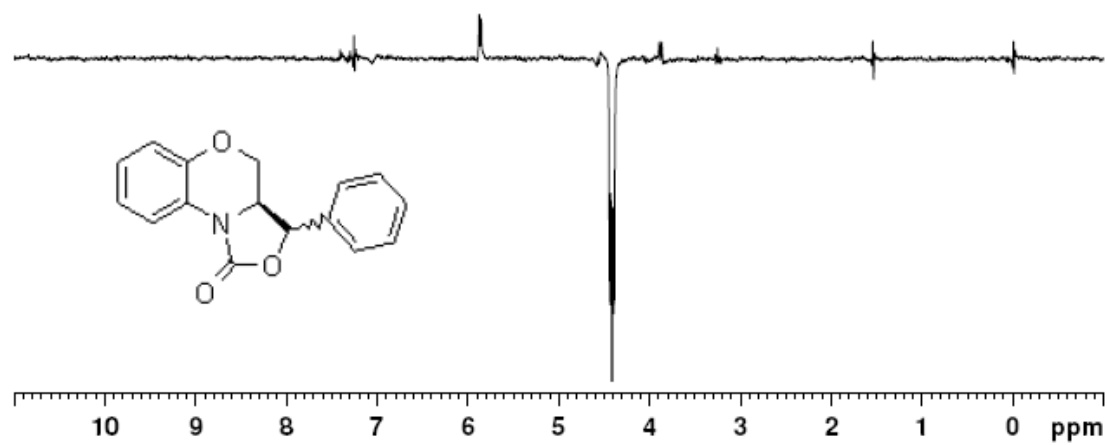

NOE 2 of compound 21a

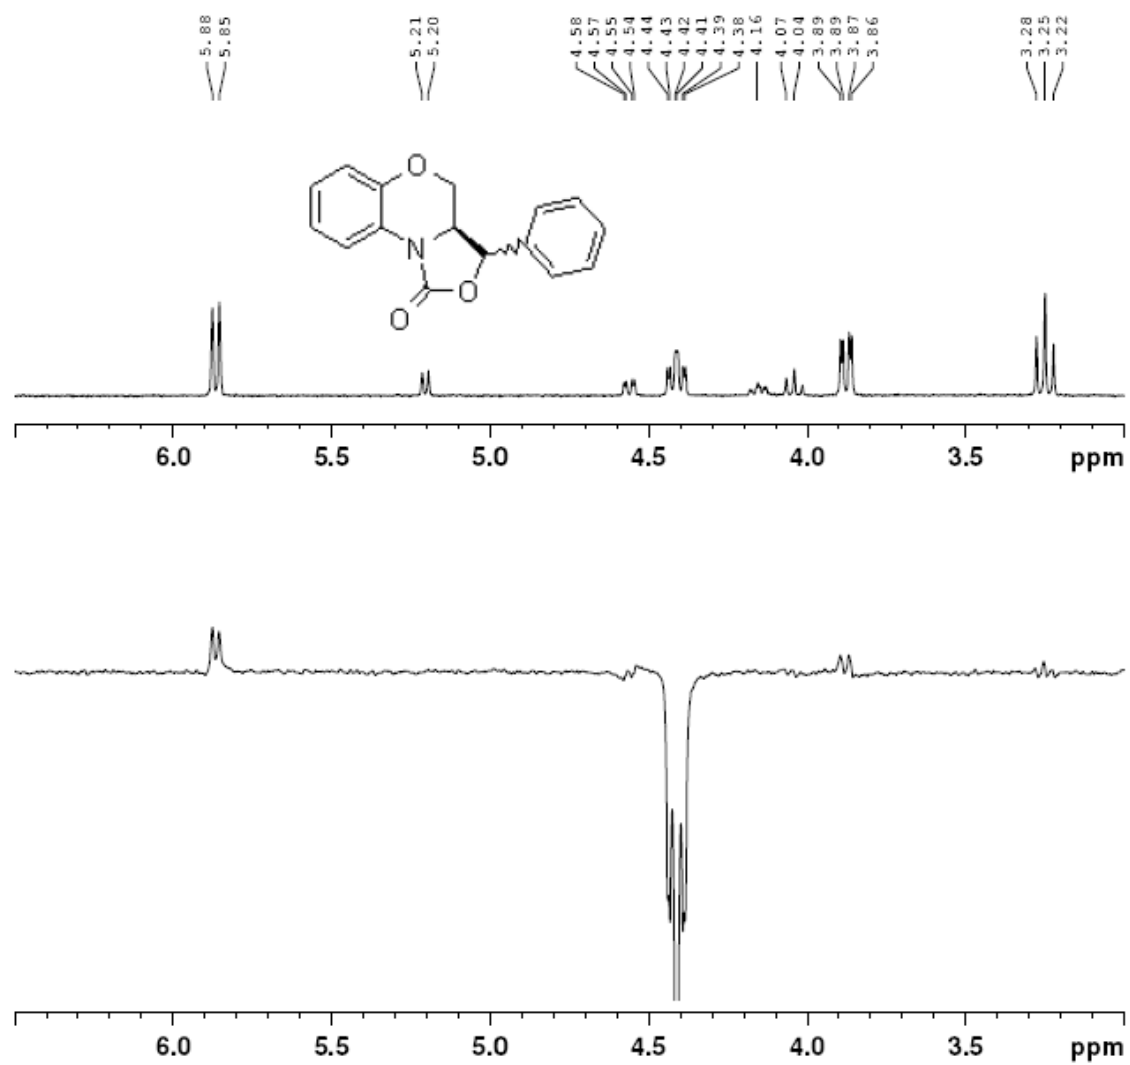

Supplement: c4ob02475c1.pdf [file c4ob02475c1.pdf]
